# Supplementary material
Source: PubMed Central journal article supplement (PMC3654248)

# Metal-free $\alpha$ -Amination of Secondary Amines: Computational and Experimental Evidence for Azaquinone Methide and Azomethine Ylide Intermediates

Arne Dieckmann,<sup>†</sup> Matthew T. Richers,<sup>‡</sup> Alena Yu. Platonova,<sup>‡,§</sup> Chen Zhang,<sup>‡</sup> Daniel Seidel,<sup>\*,‡</sup> and K. N. Houk<sup>\*,†</sup>

<sup>†</sup> *Department of Chemistry and Biochemistry, University of California, Los Angeles, California 90095, United States*

<sup>‡</sup> *Department of Chemistry and Chemical Biology, Rutgers, The State University of New Jersey, Piscataway, New Jersey 08854, United States*

<sup>§</sup> *Department of Organic Synthesis Technology, Ural Federal University, Yekaterinburg, 620002, Russia*

## Supporting Information

Table of Contents:

<sup>1</sup>H-NMR and <sup>13</sup>C-NMR spectra of all reported compounds..... pp. 2–50

$^1\text{H}$  NMR of **2a** in  $\text{CDCl}_3$

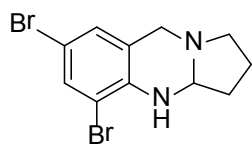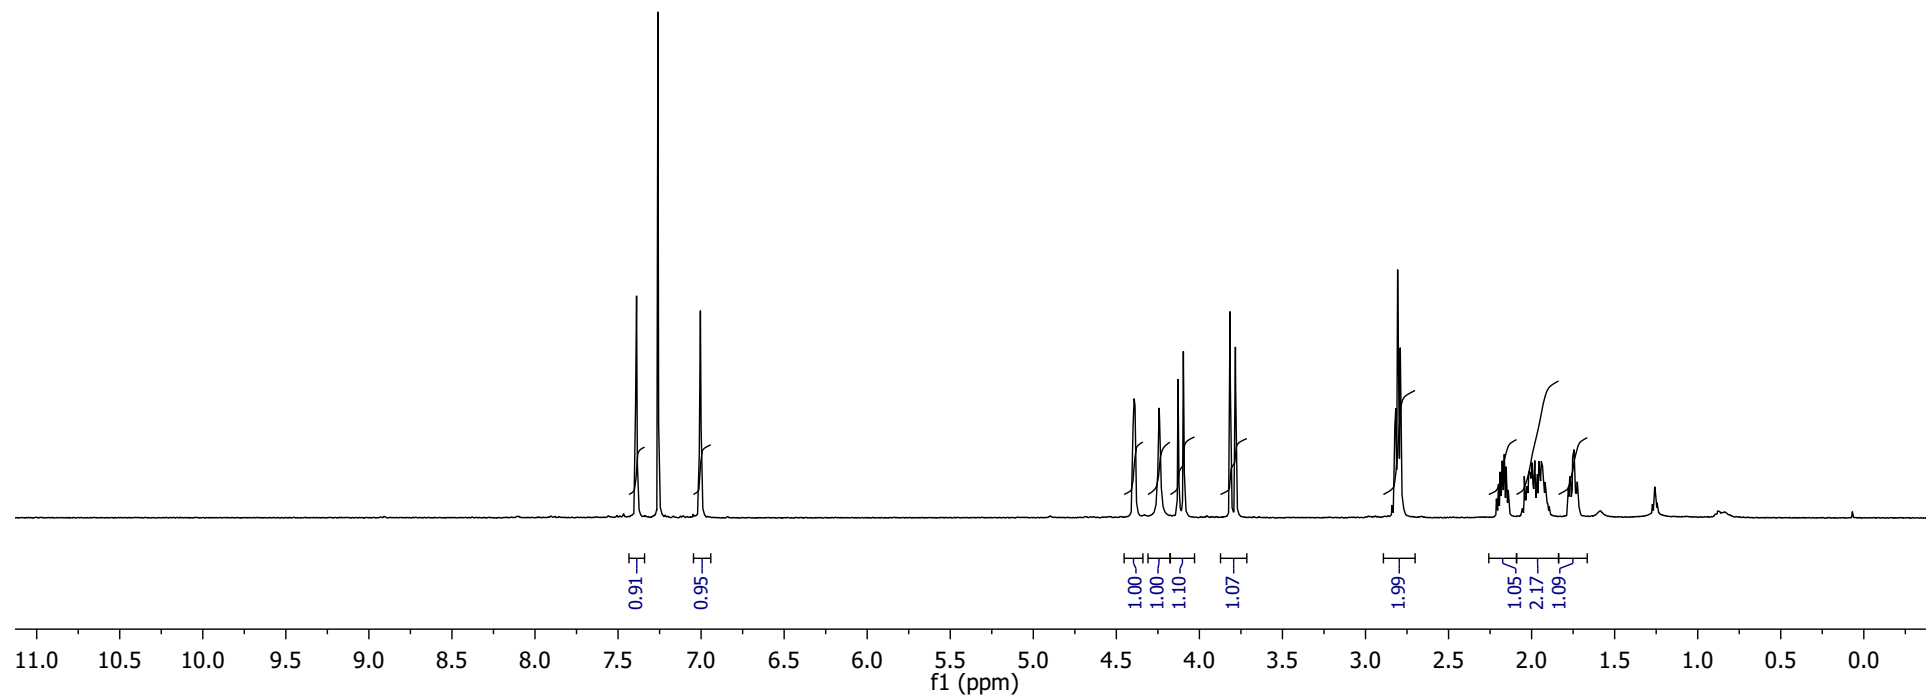

$^{13}\text{C}$  NMR of **2a** in  $\text{CDCl}_3$

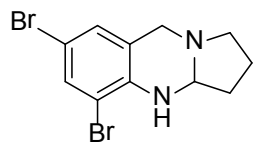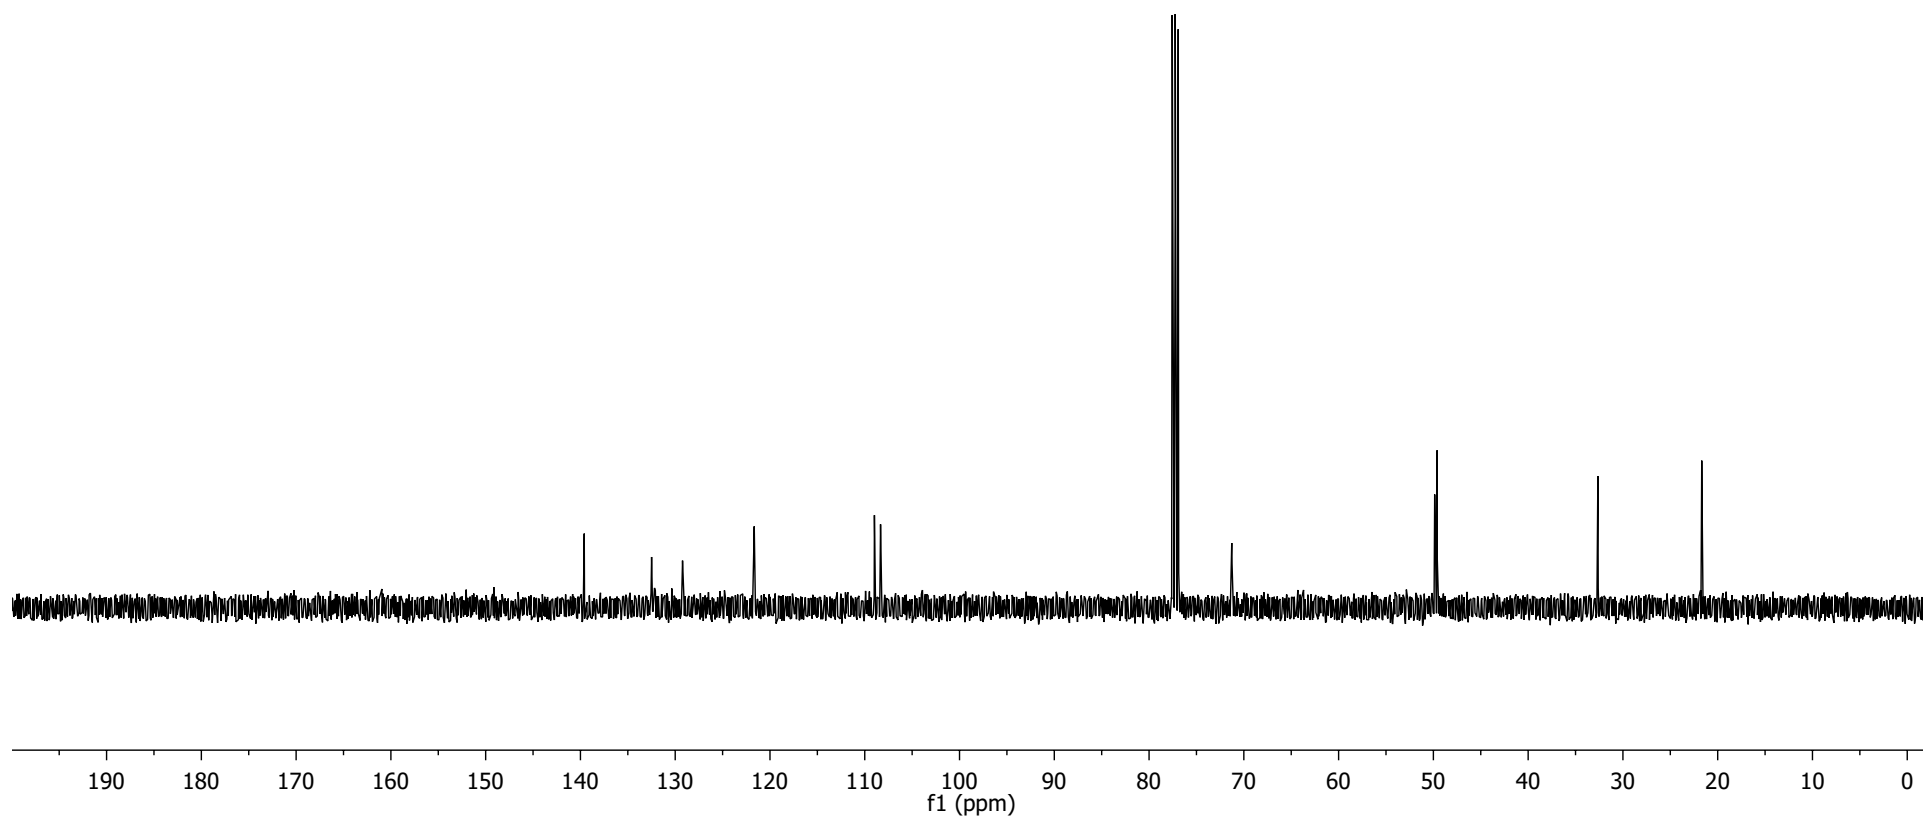

$^1\text{H}$  NMR of **2b** in  $\text{CDCl}_3$

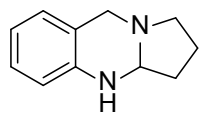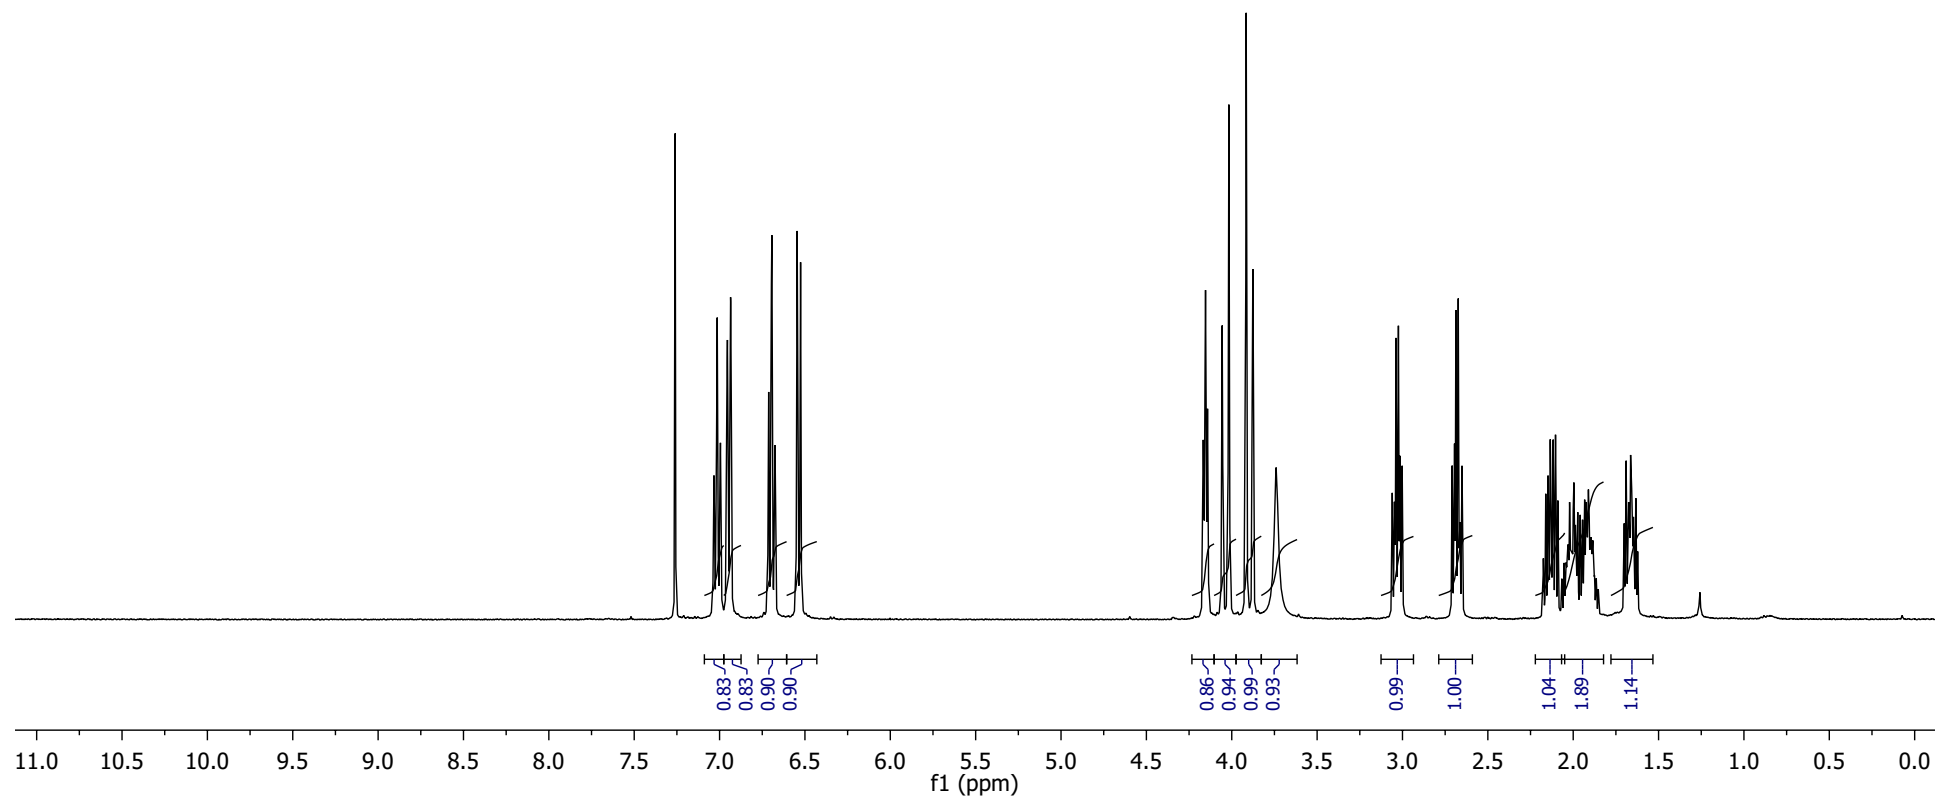

$^{13}\text{C}$  NMR of **2b** in  $\text{CDCl}_3$

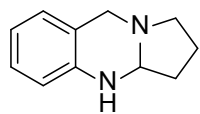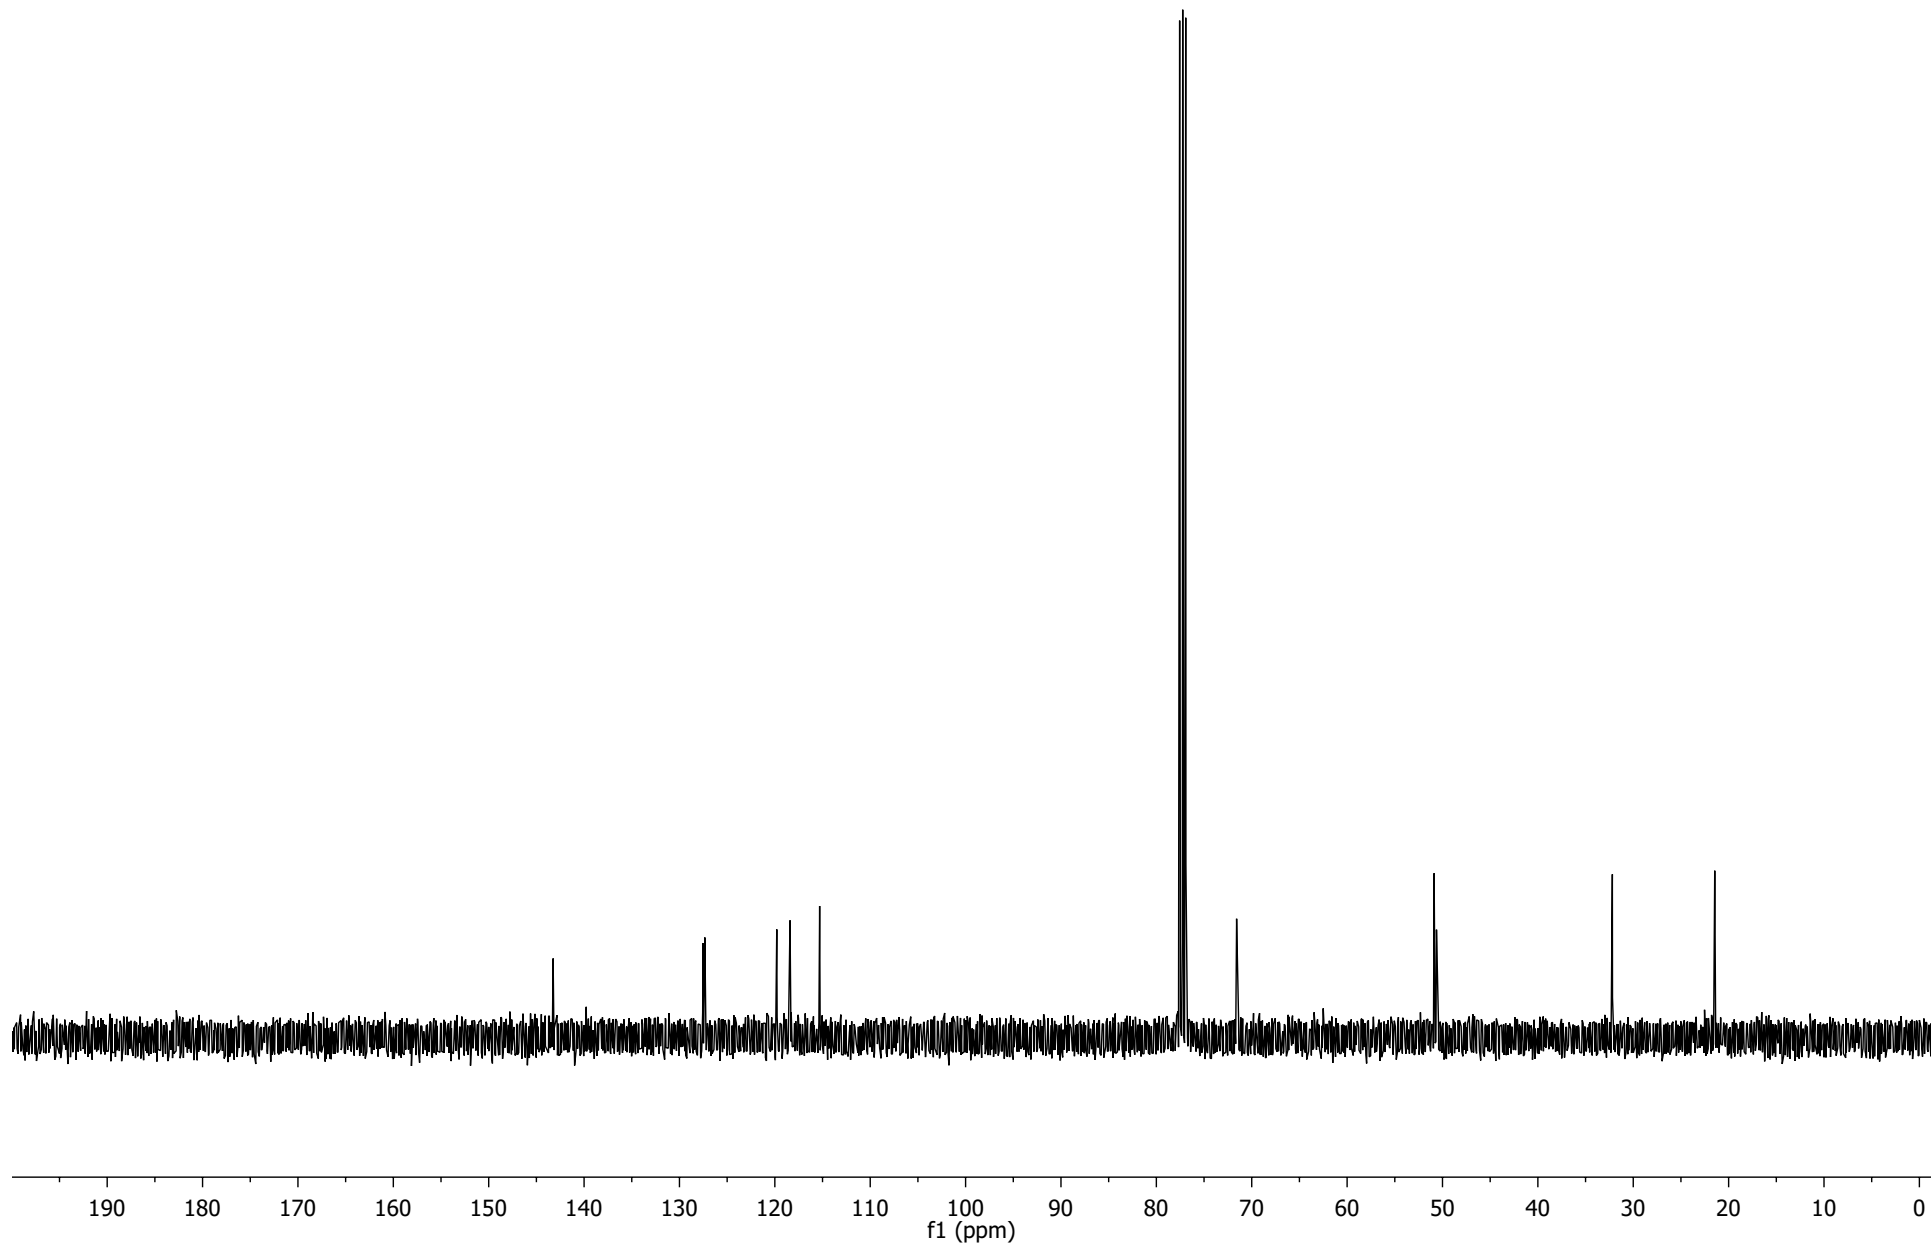

$^1\text{H}$  NMR of **2c** in  $\text{CDCl}_3$

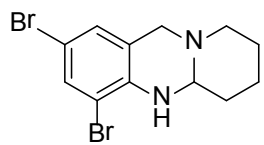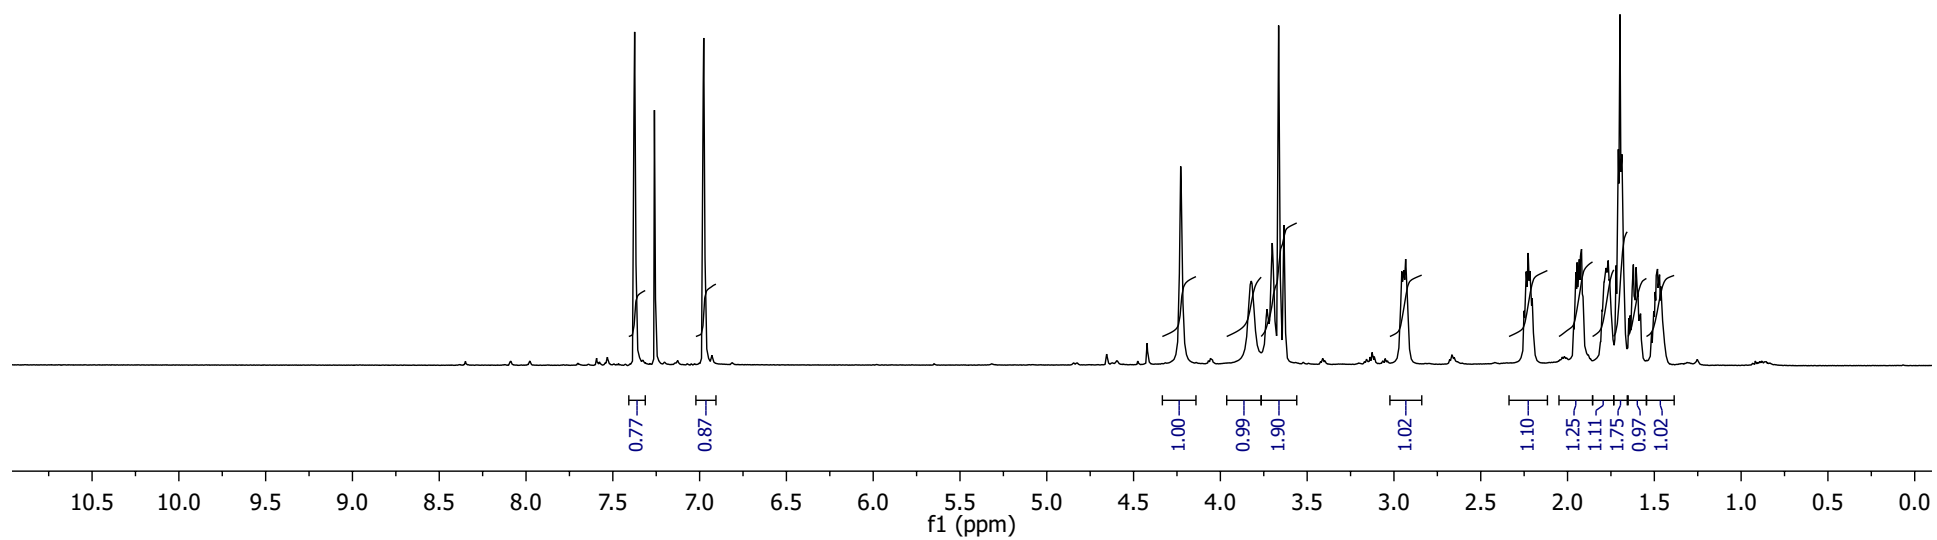

$^{13}\text{C}$  NMR of **2c** in  $\text{CDCl}_3$

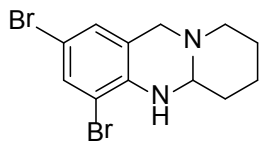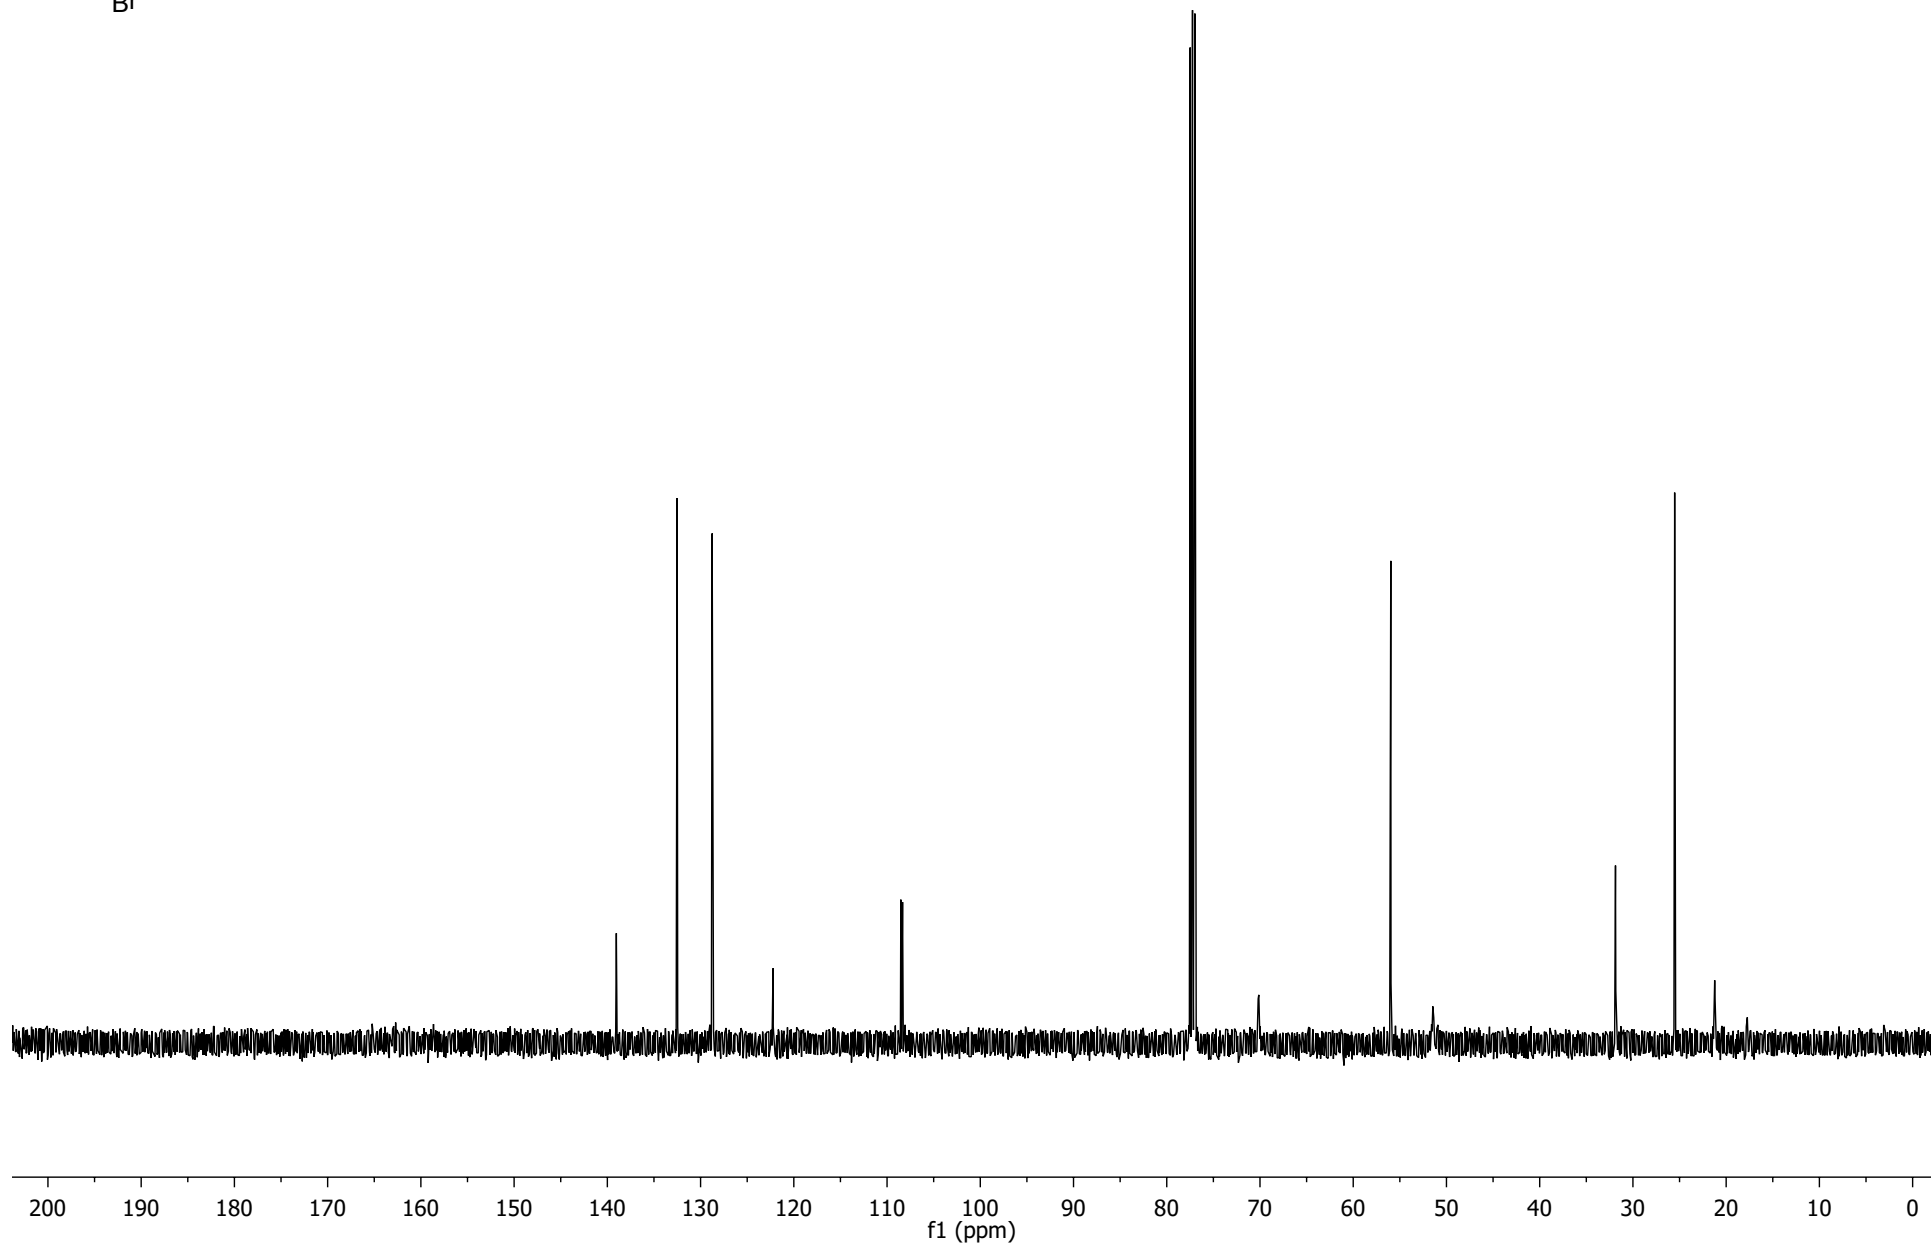

$^1\text{H}$  NMR of **2d** in  $\text{CDCl}_3$

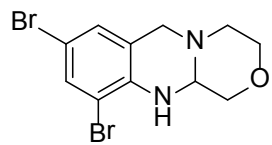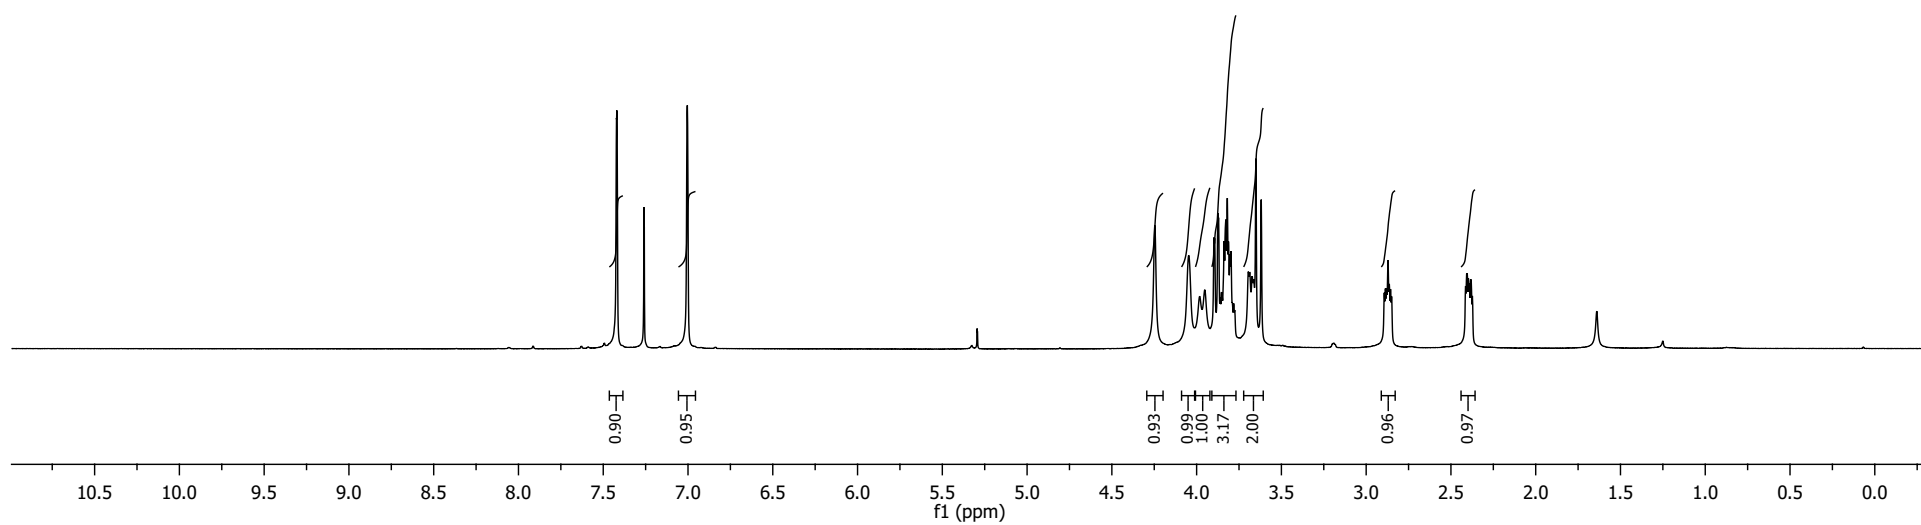



$^{13}\text{C}$  NMR of **2d** in  $\text{CDCl}_3$

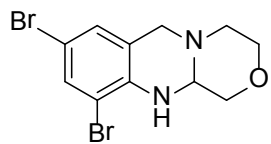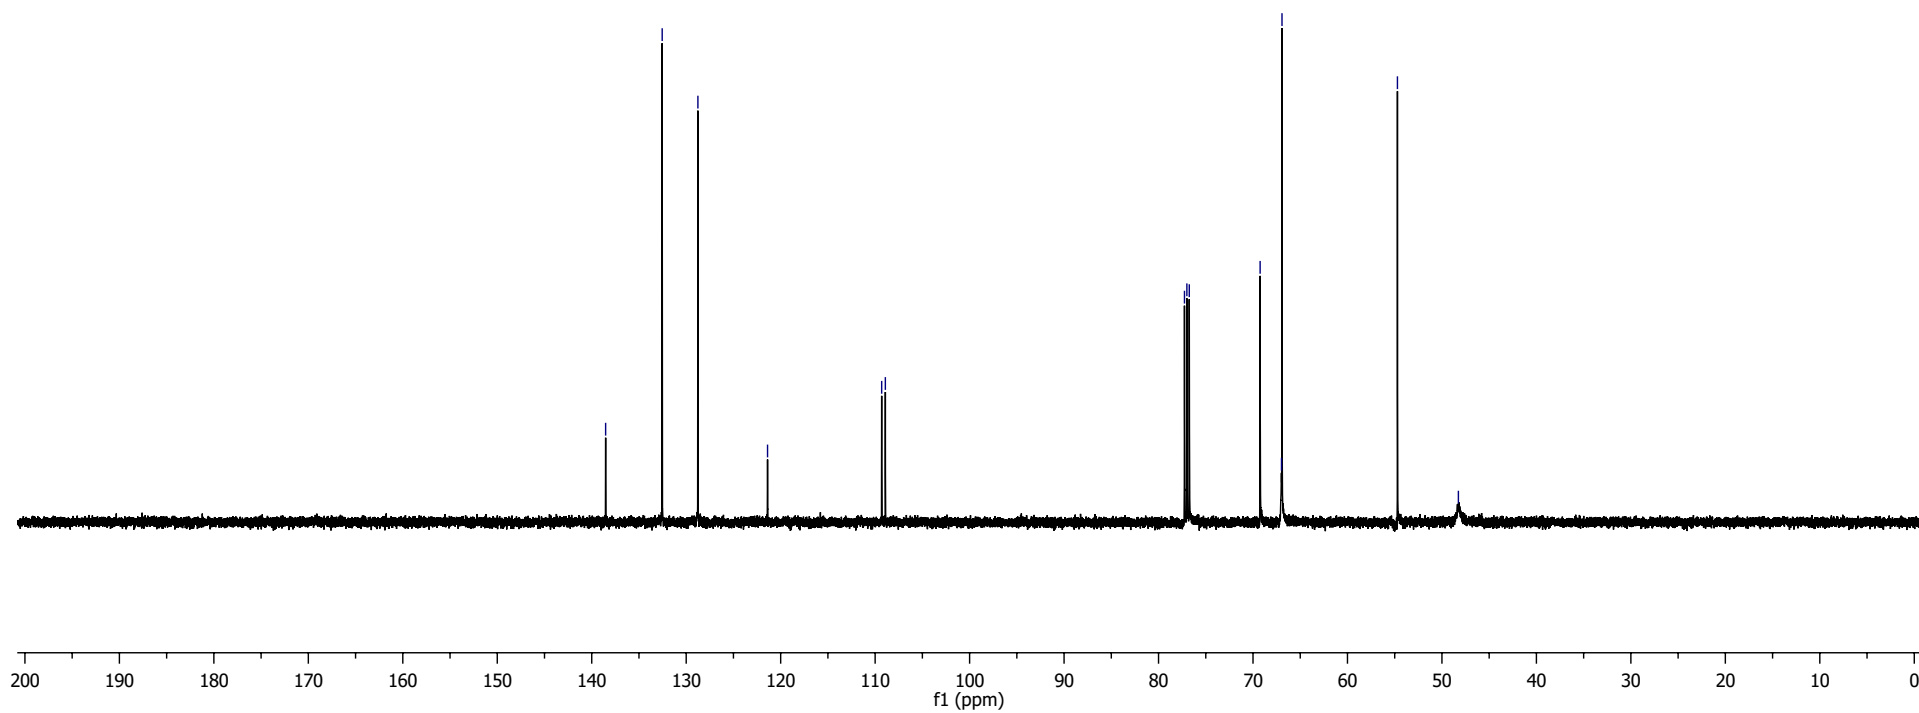

$^1\text{H}$  NMR of **2e** in  $\text{CDCl}_3$

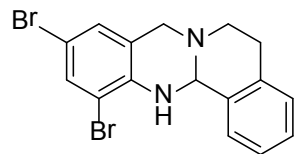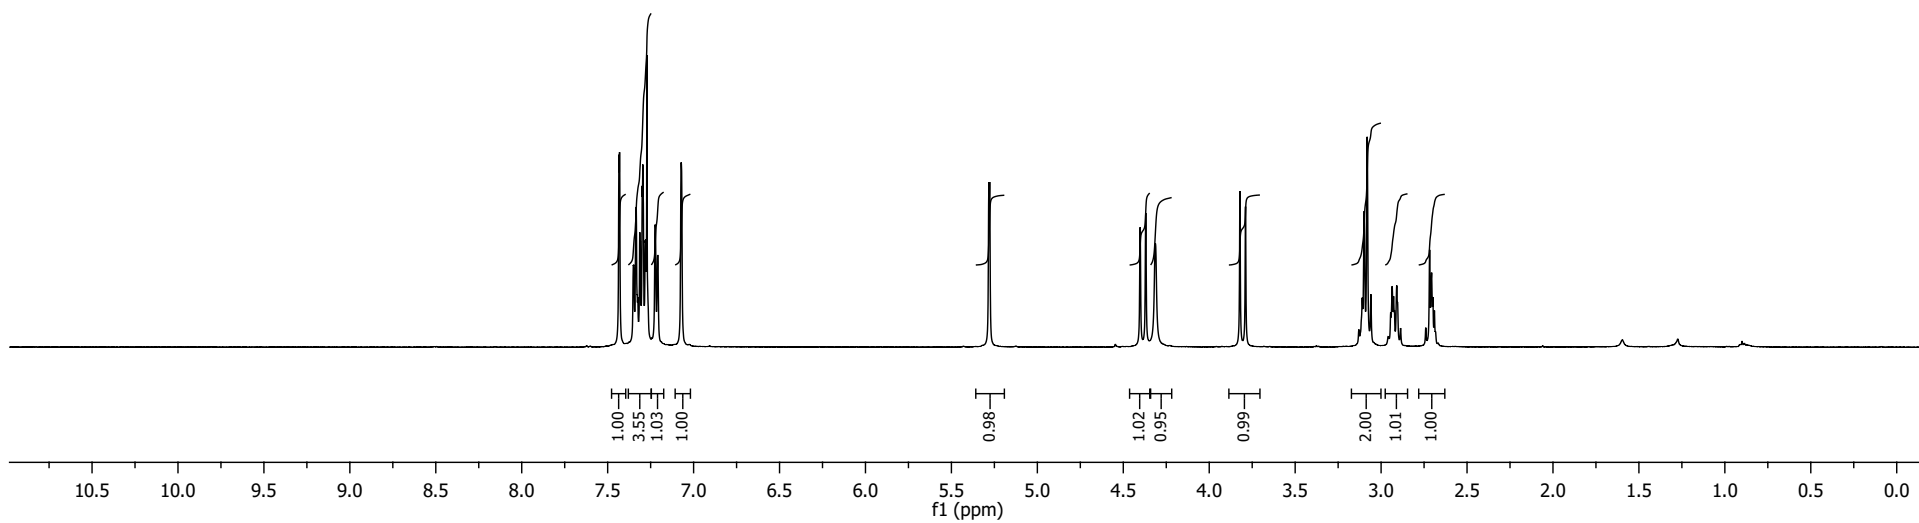

$^{13}\text{C}$  NMR of **2e** in  $\text{CDCl}_3$

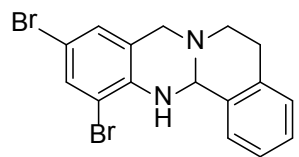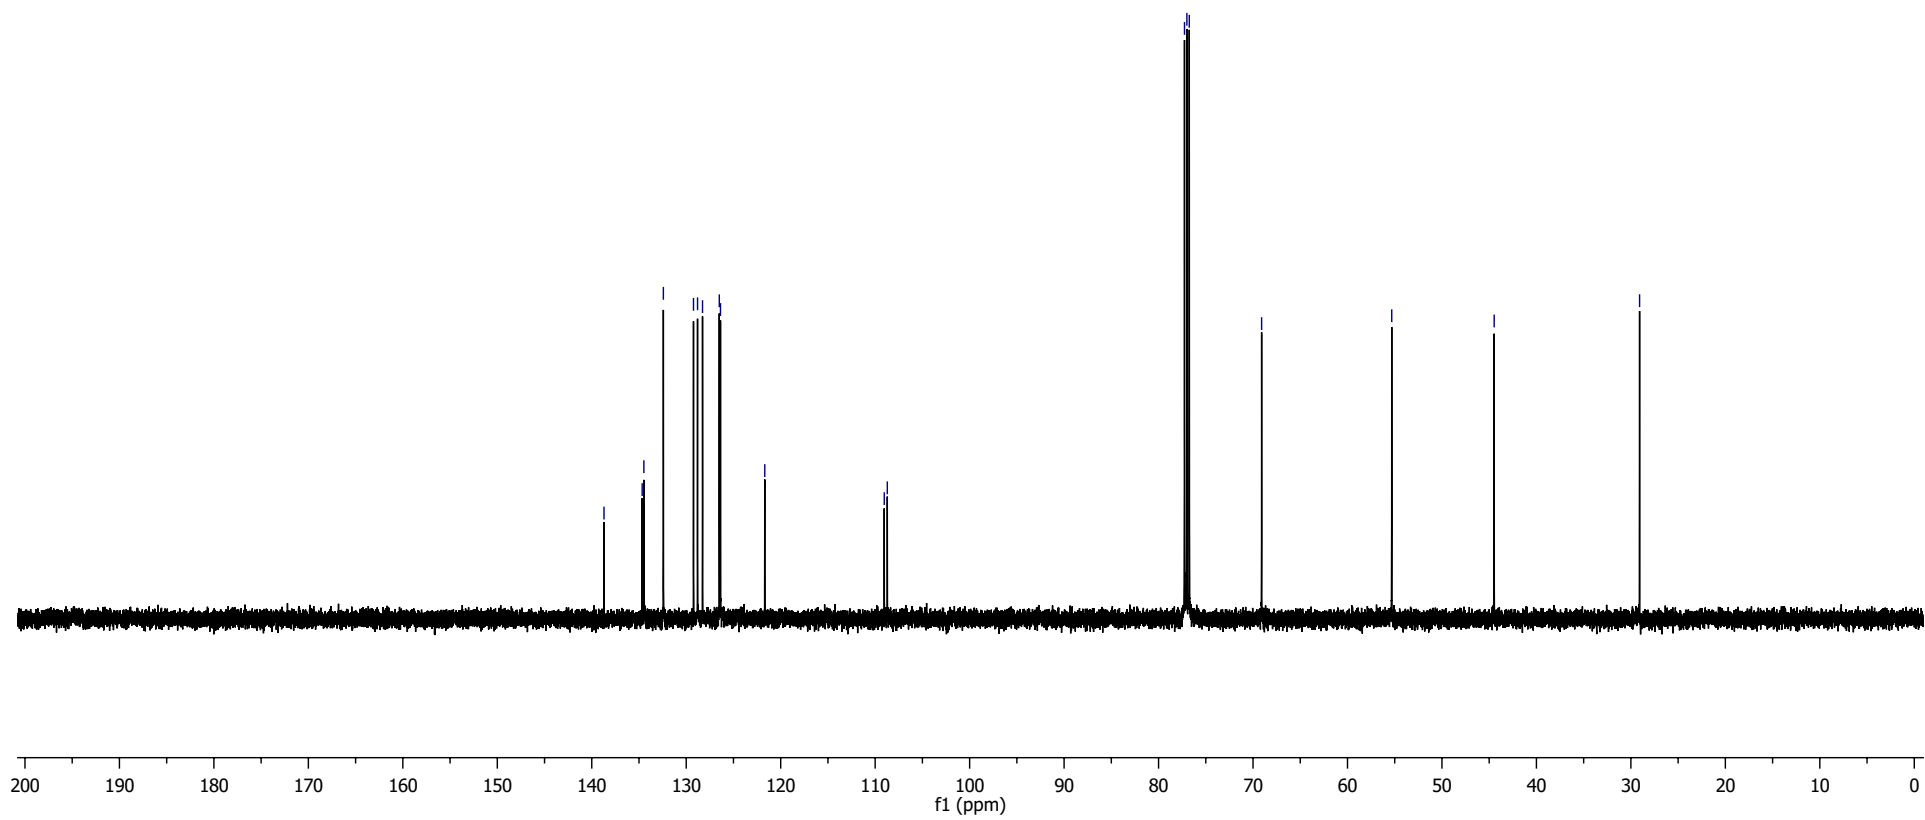

$^1\text{H}$  NMR of **2g** in  $\text{CDCl}_3$

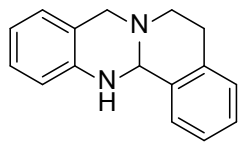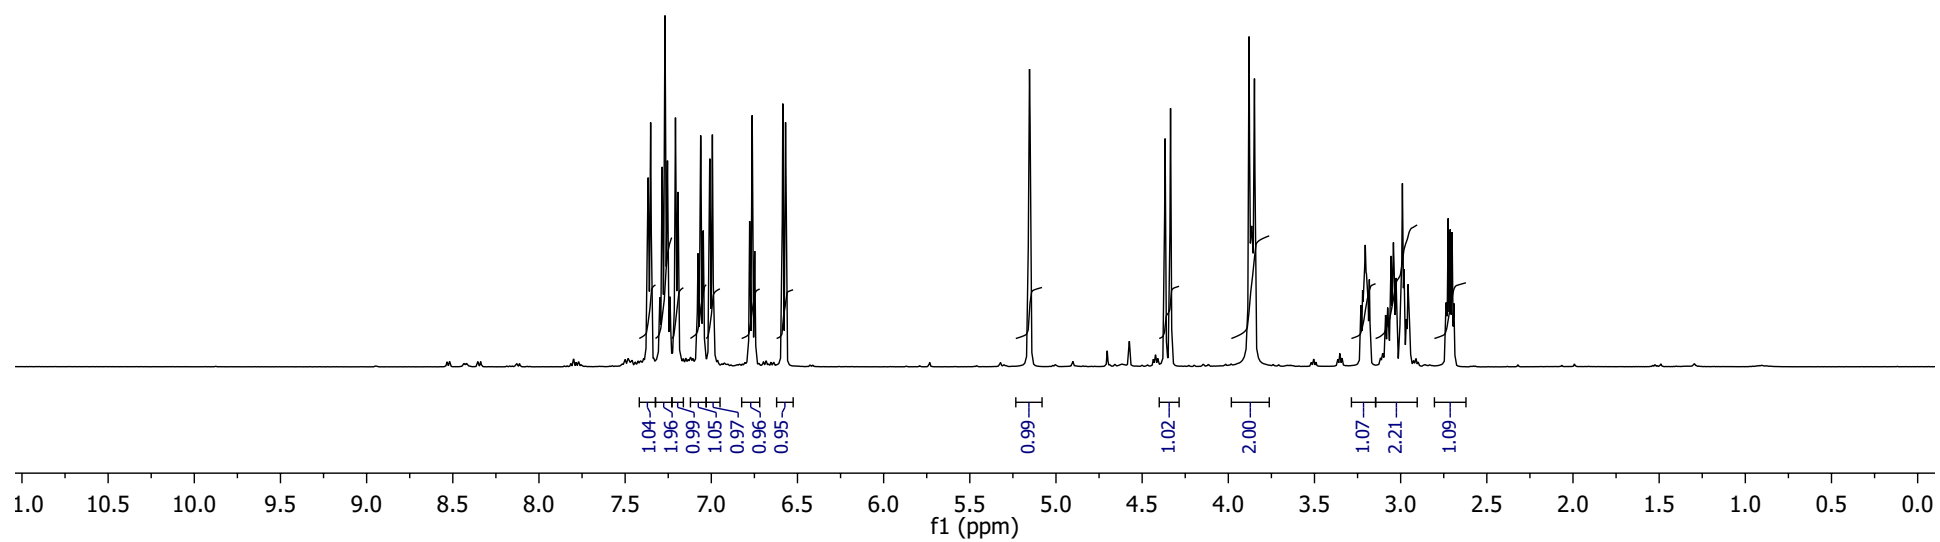

$^{13}\text{C}$  NMR of **2g** in  $\text{CDCl}_3$

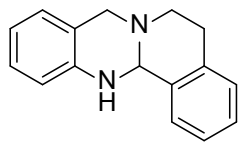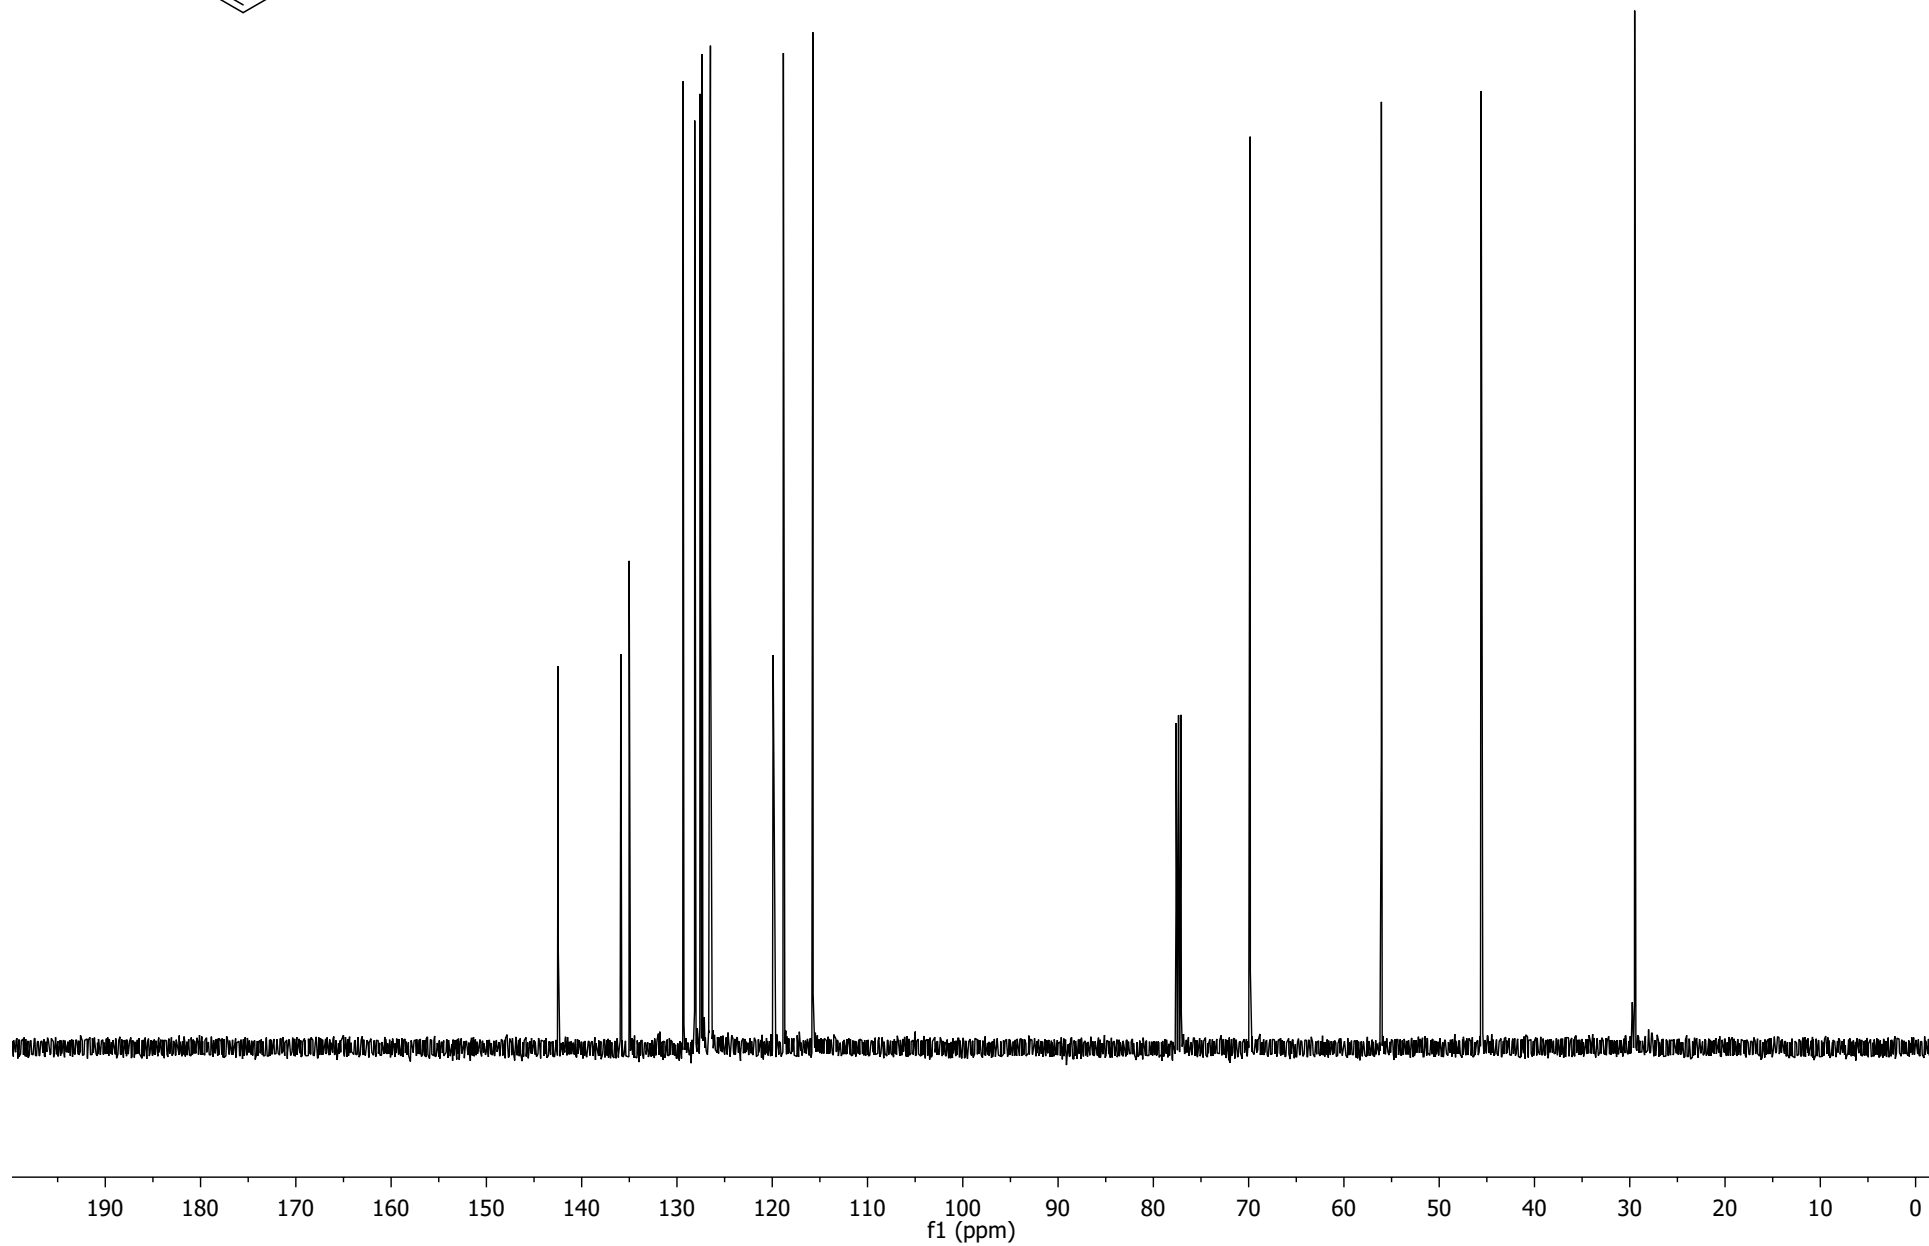

$^1\text{H}$  NMR of **2h** in  $\text{CDCl}_3$

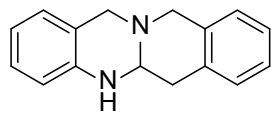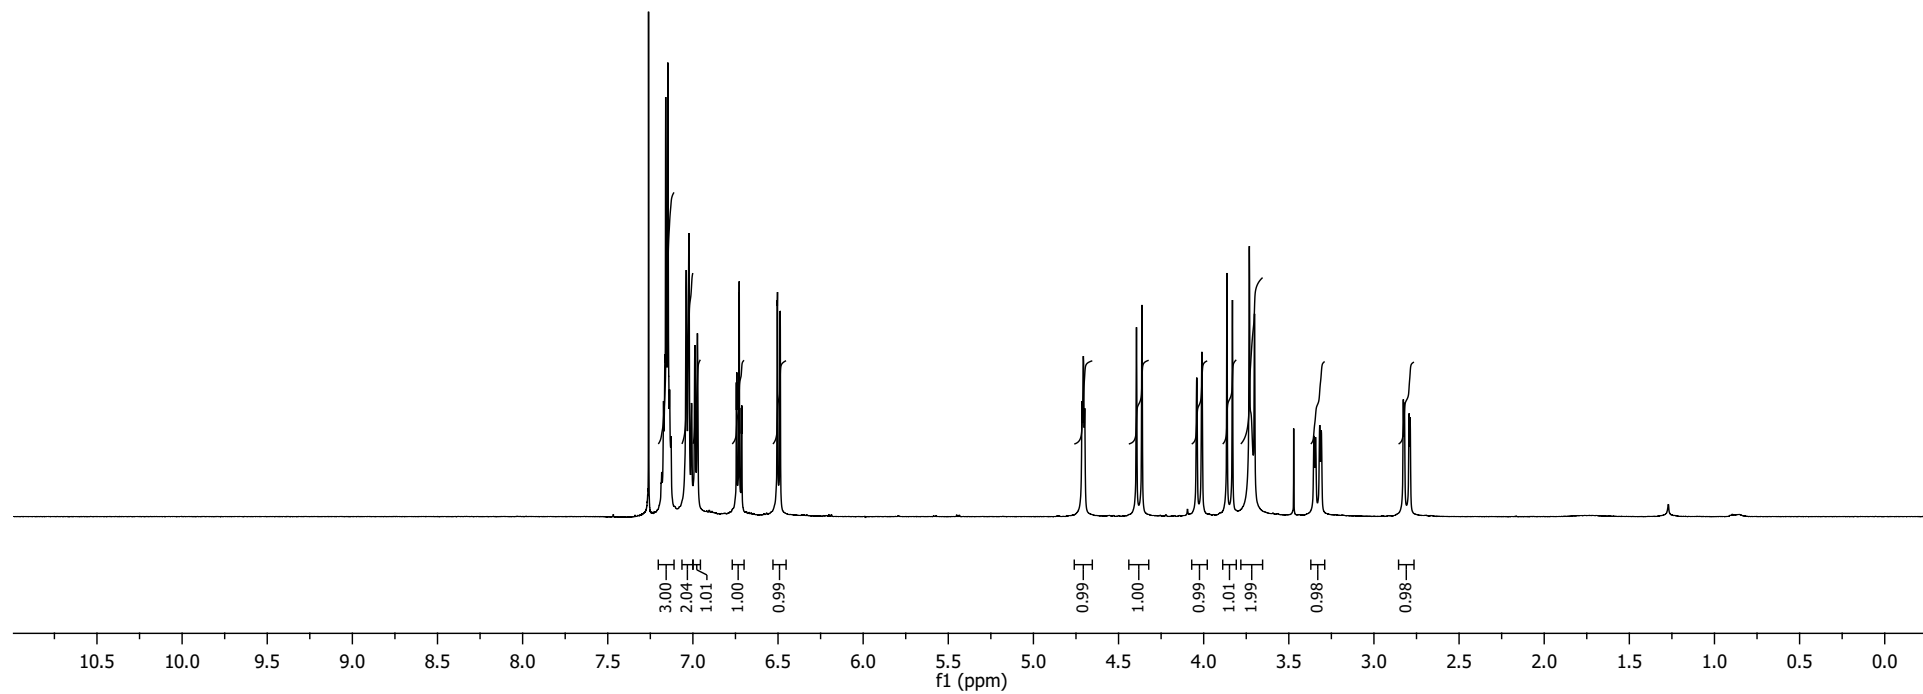

$^{13}\text{C}$  NMR of **2h** in  $\text{CDCl}_3$

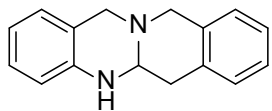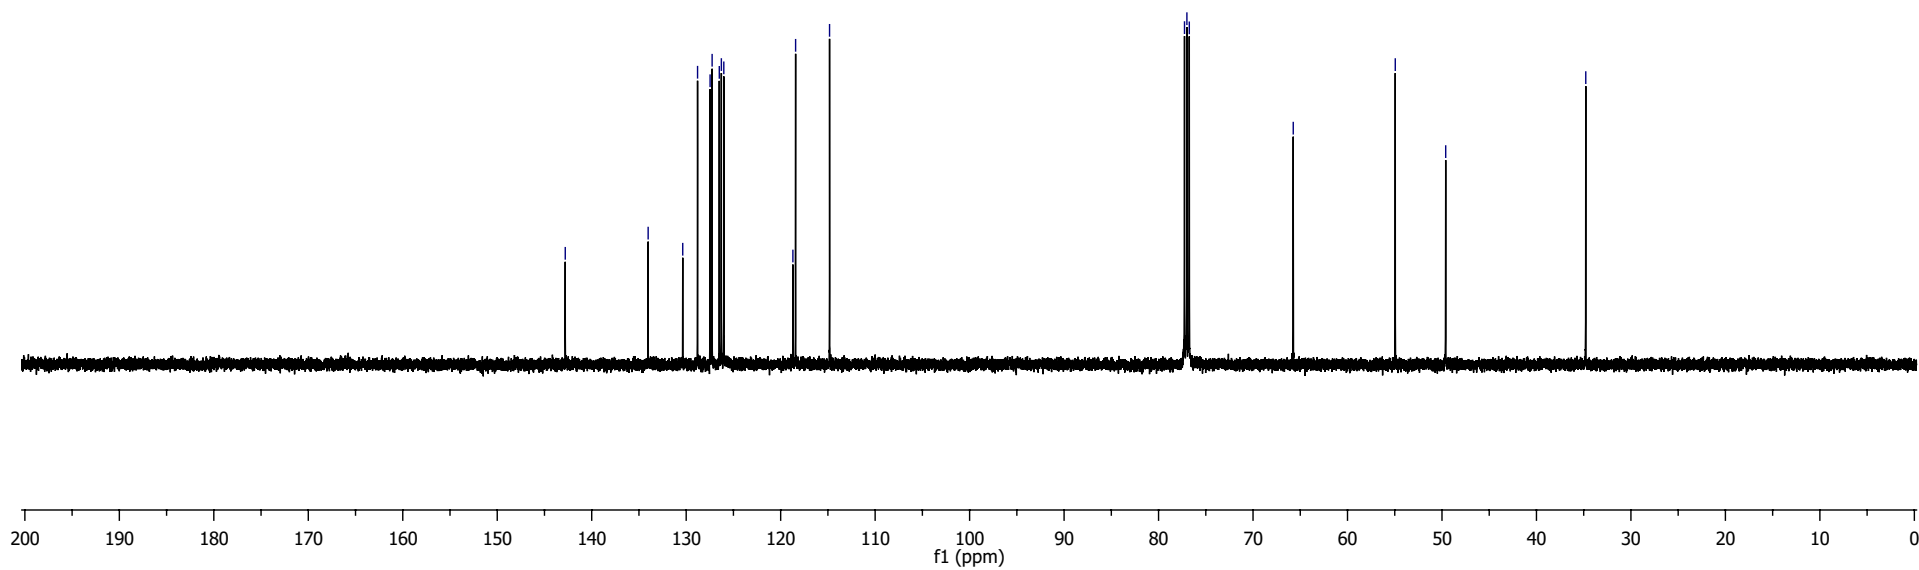

$^1\text{H}$  NMR of **2j** in  $\text{CDCl}_3$

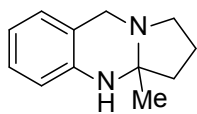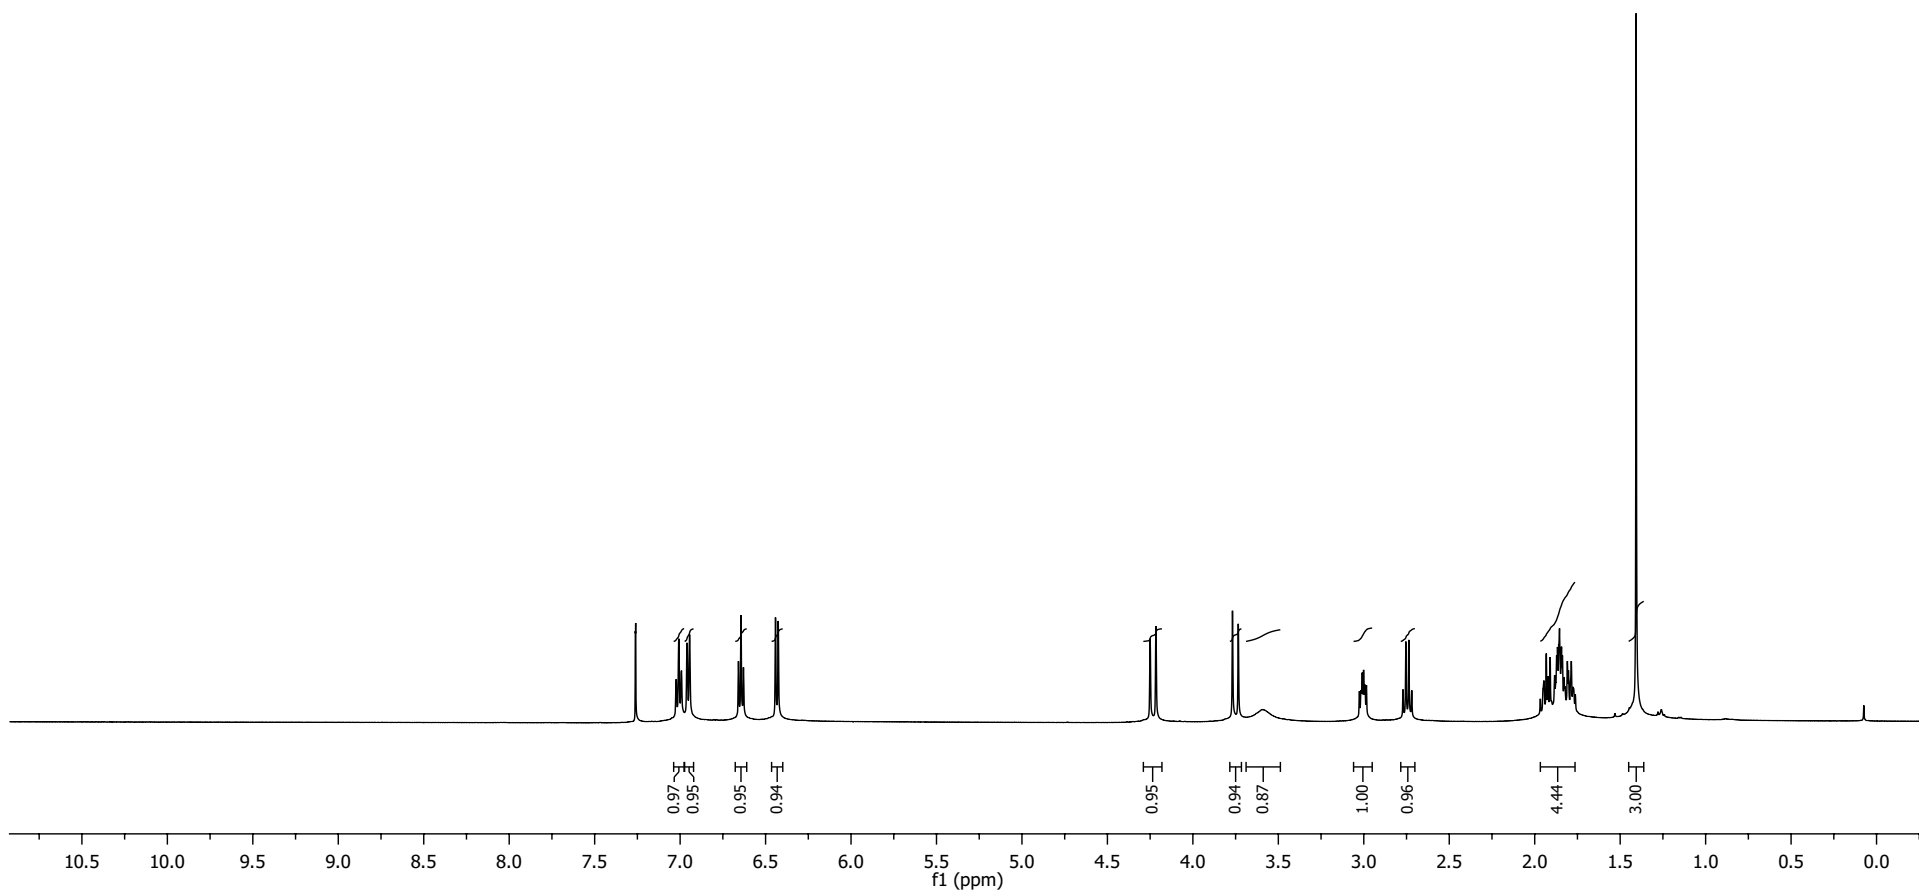



$^{13}\text{C}$  NMR of **2j** in  $\text{CDCl}_3$

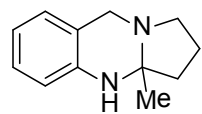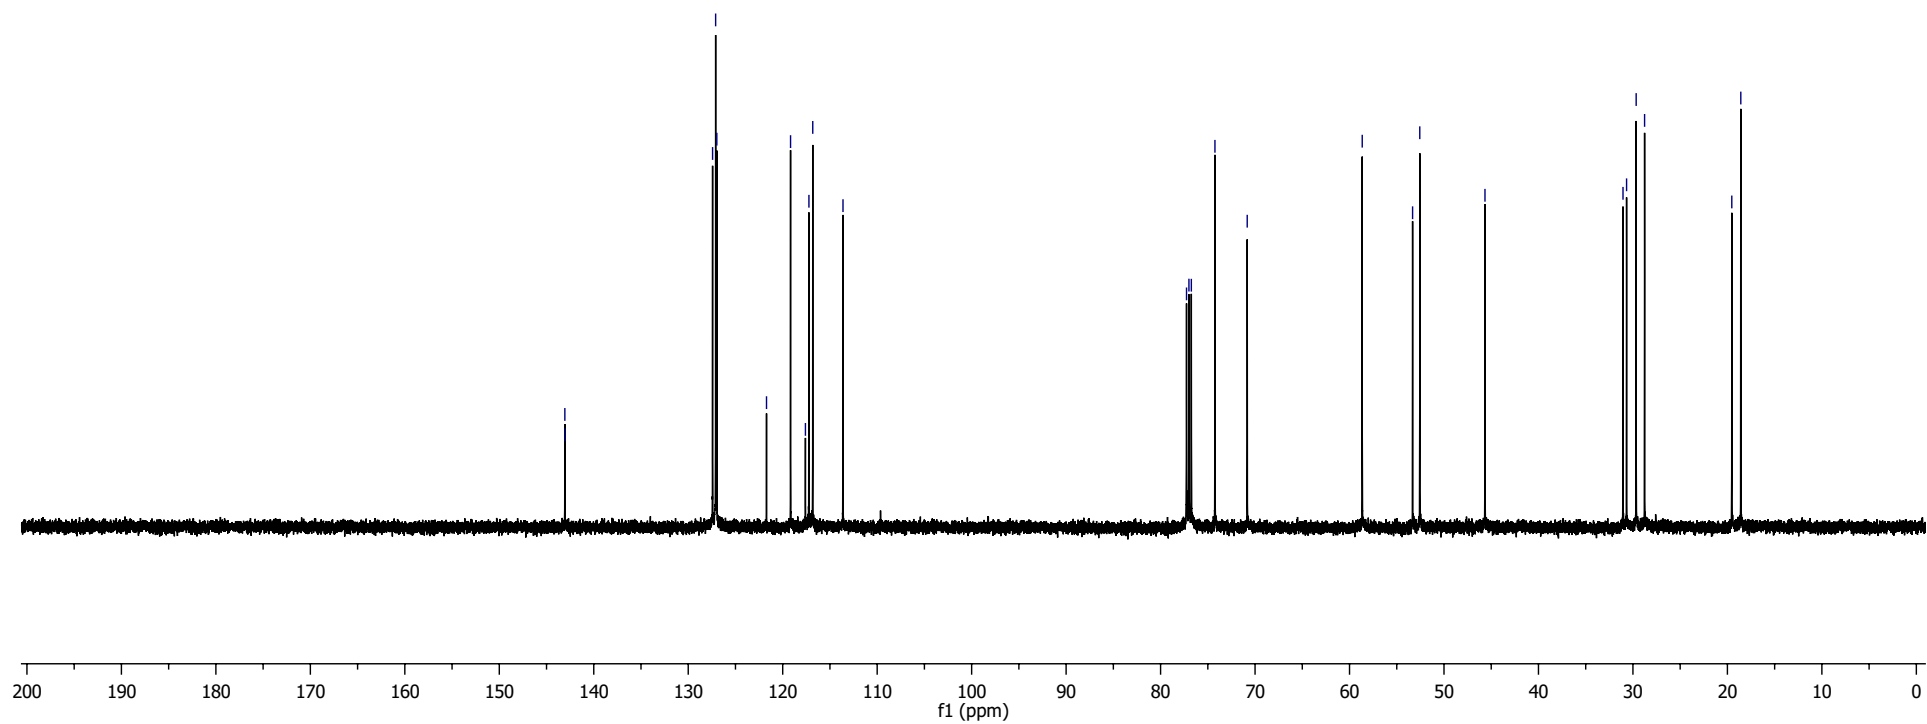

$^1\text{H}$  NMR of **2k** in  $\text{CDCl}_3$

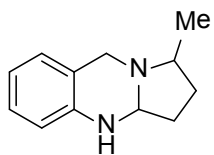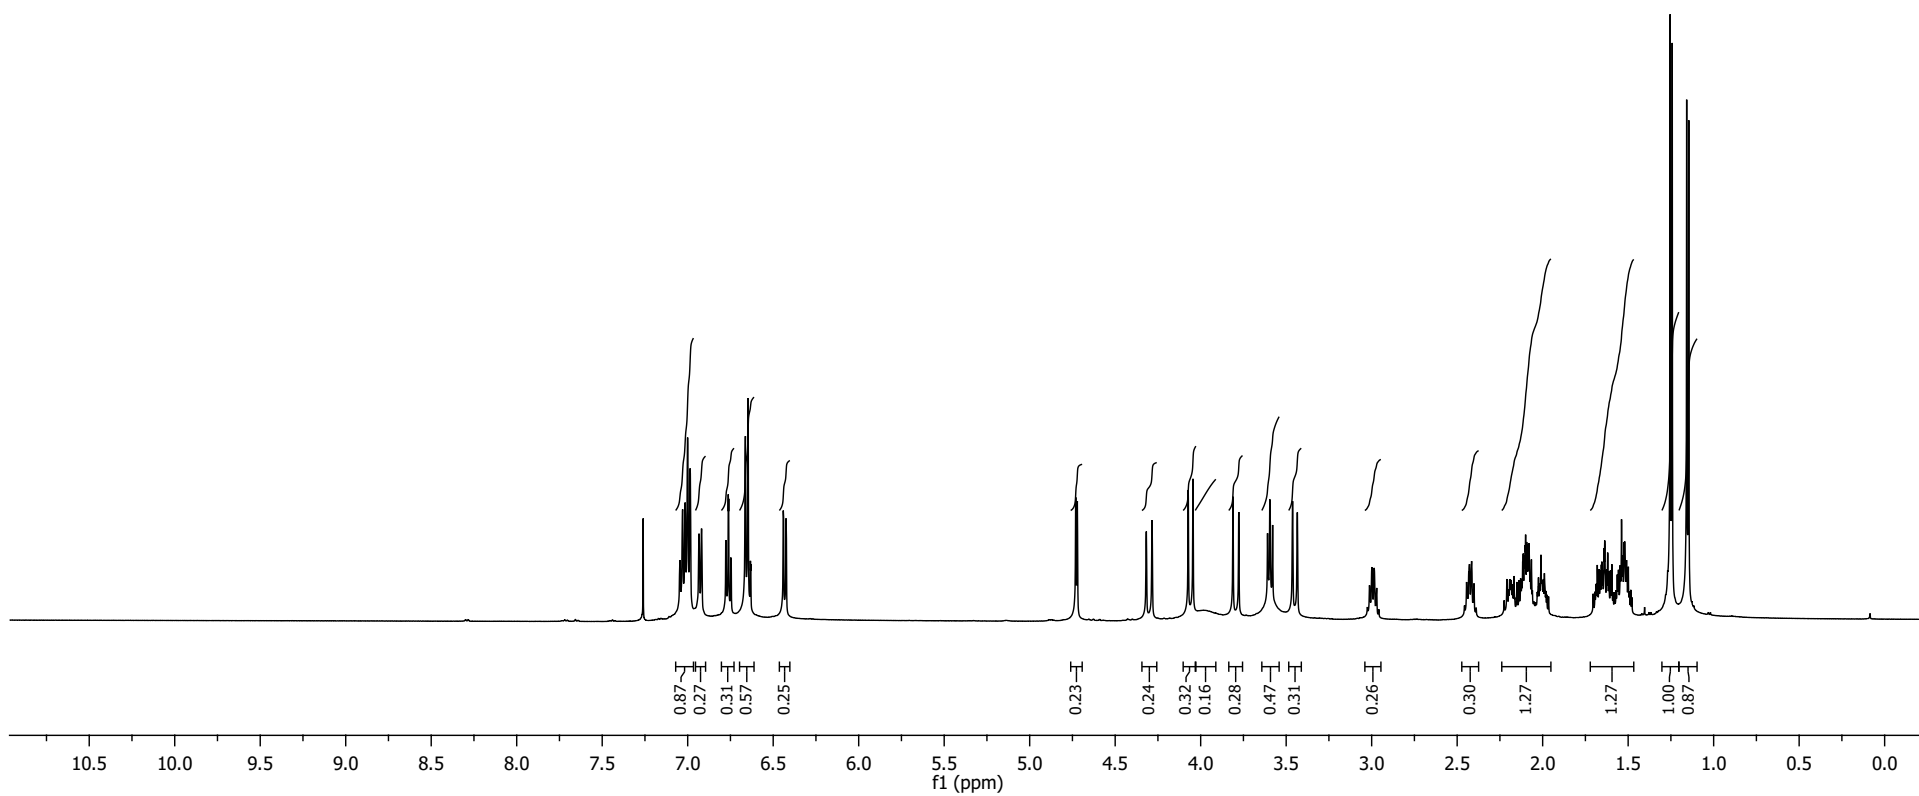

$^{13}\text{C}$  NMR of **2k** in  $\text{CDCl}_3$

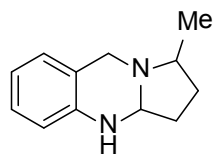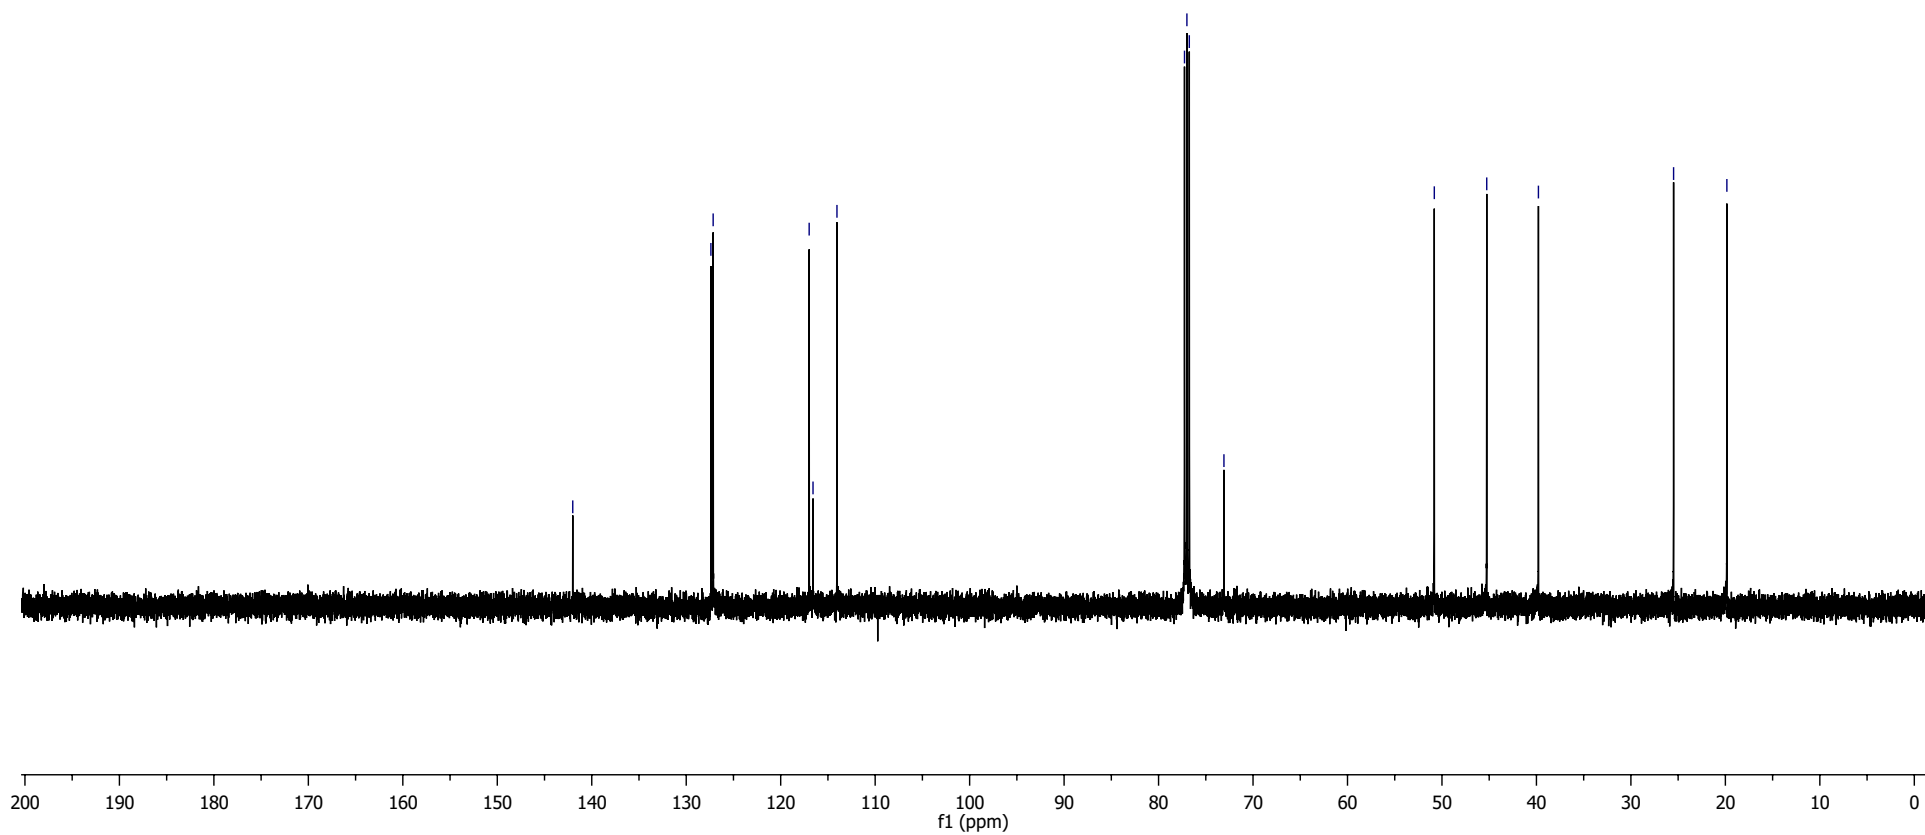

$^1\text{H}$  NMR of **11'** in  $\text{CDCl}_3$

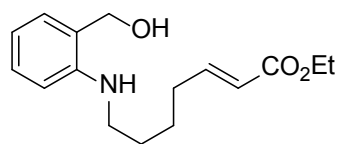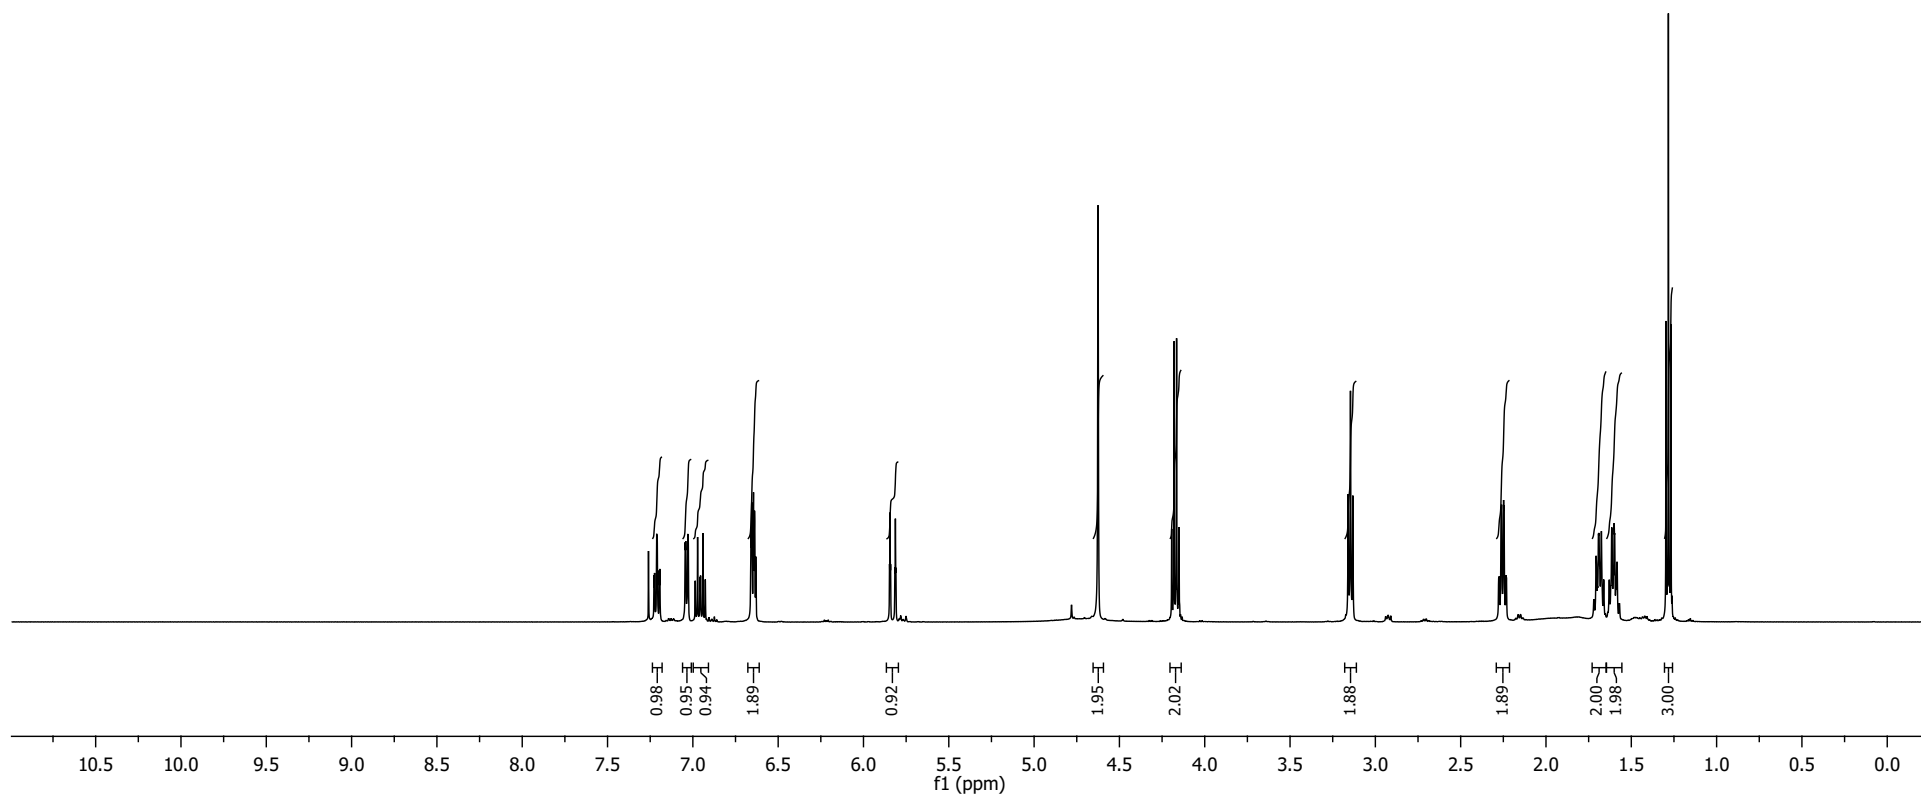

$^{13}\text{C}$  NMR of **11'** in  $\text{CDCl}_3$

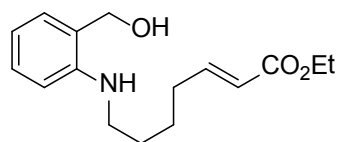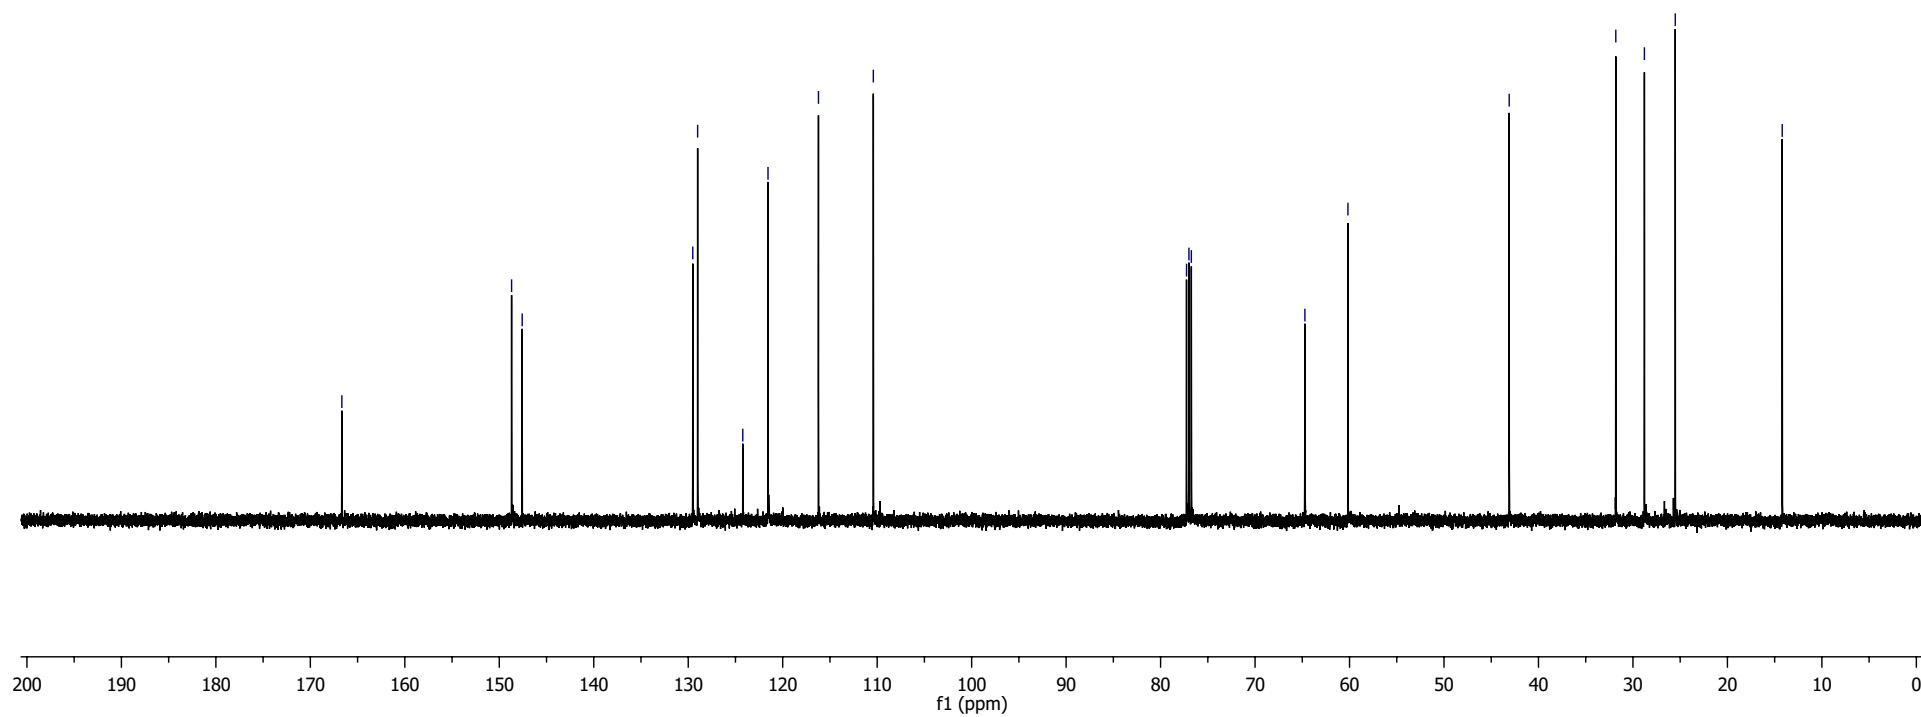

$^1\text{H}$  NMR of **11** in  $\text{CDCl}_3$

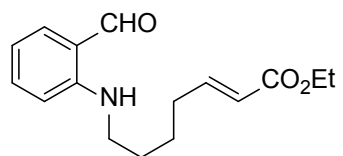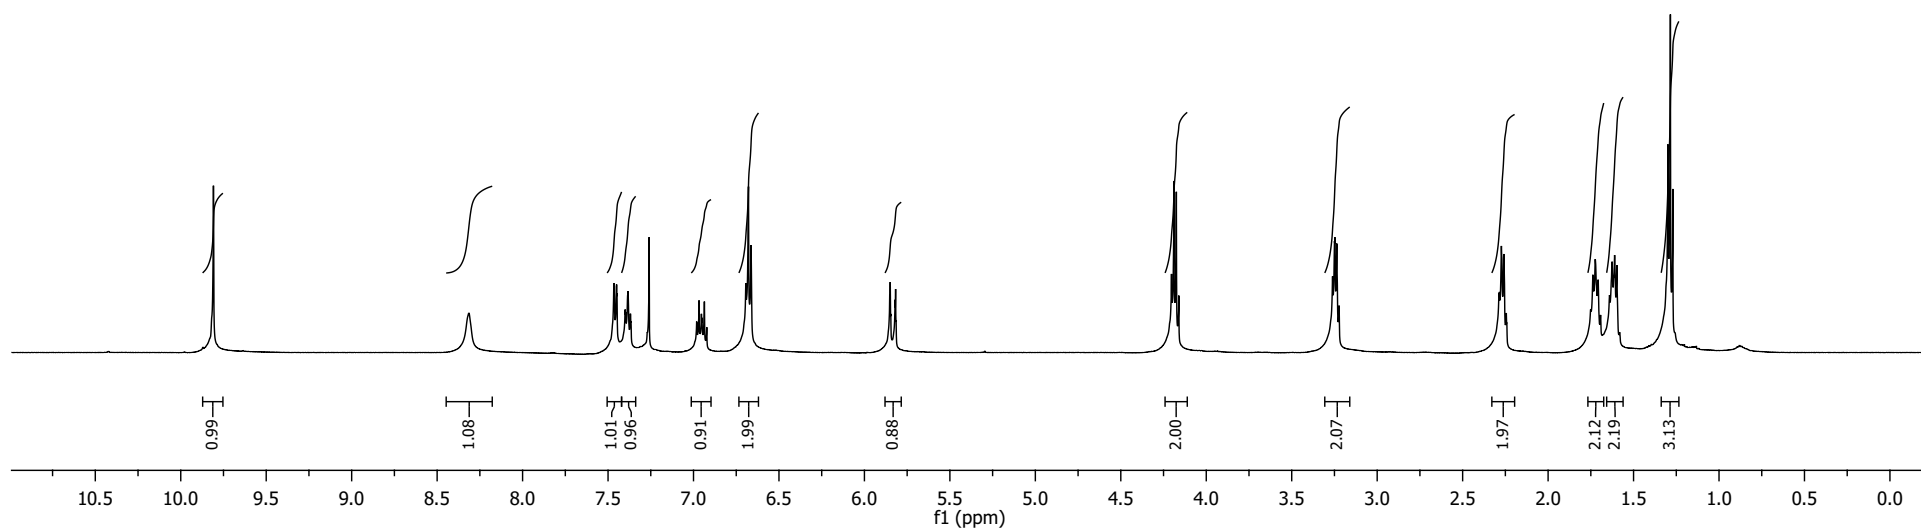

$^{13}\text{C}$  NMR of **11** in  $\text{CDCl}_3$

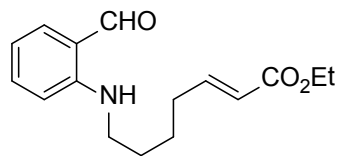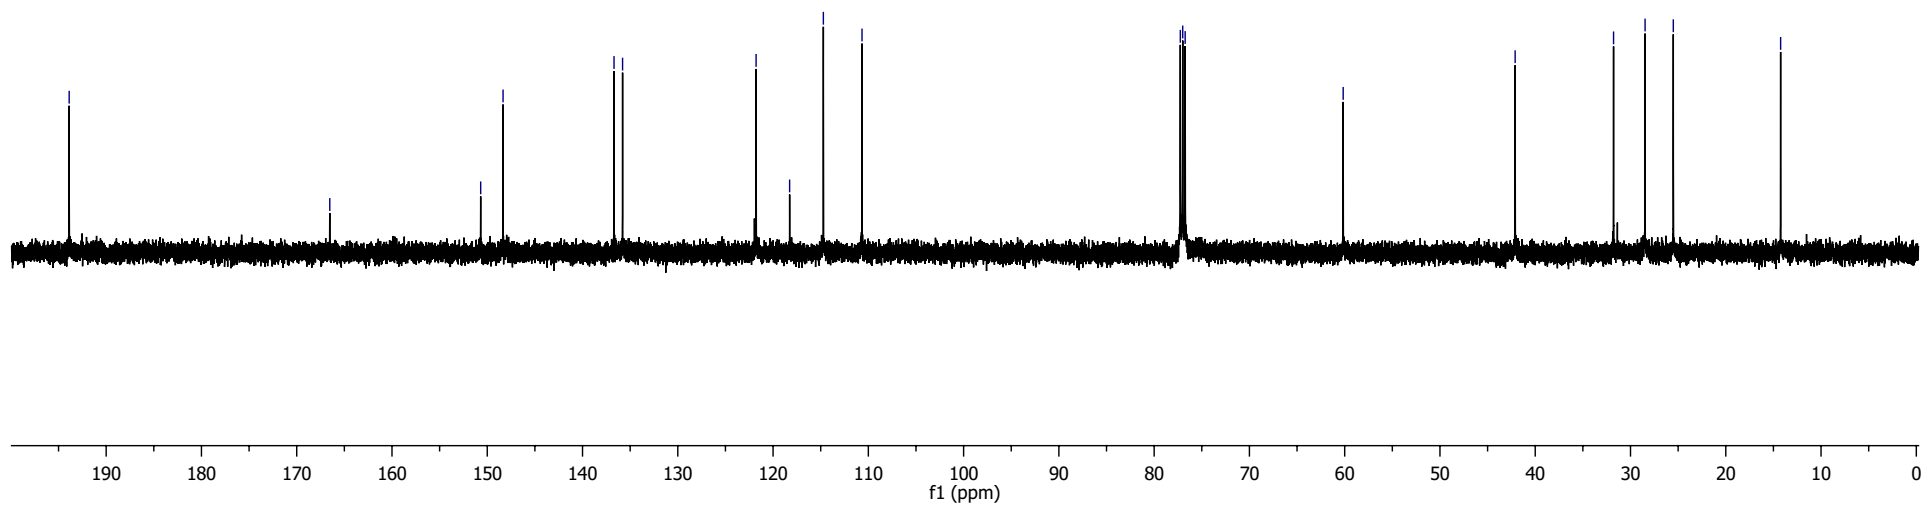

$^1\text{H}$  NMR of **12** in  $(\text{CD}_3)_2\text{CO}$

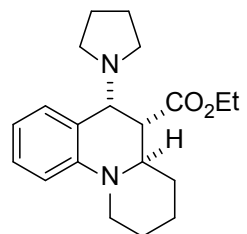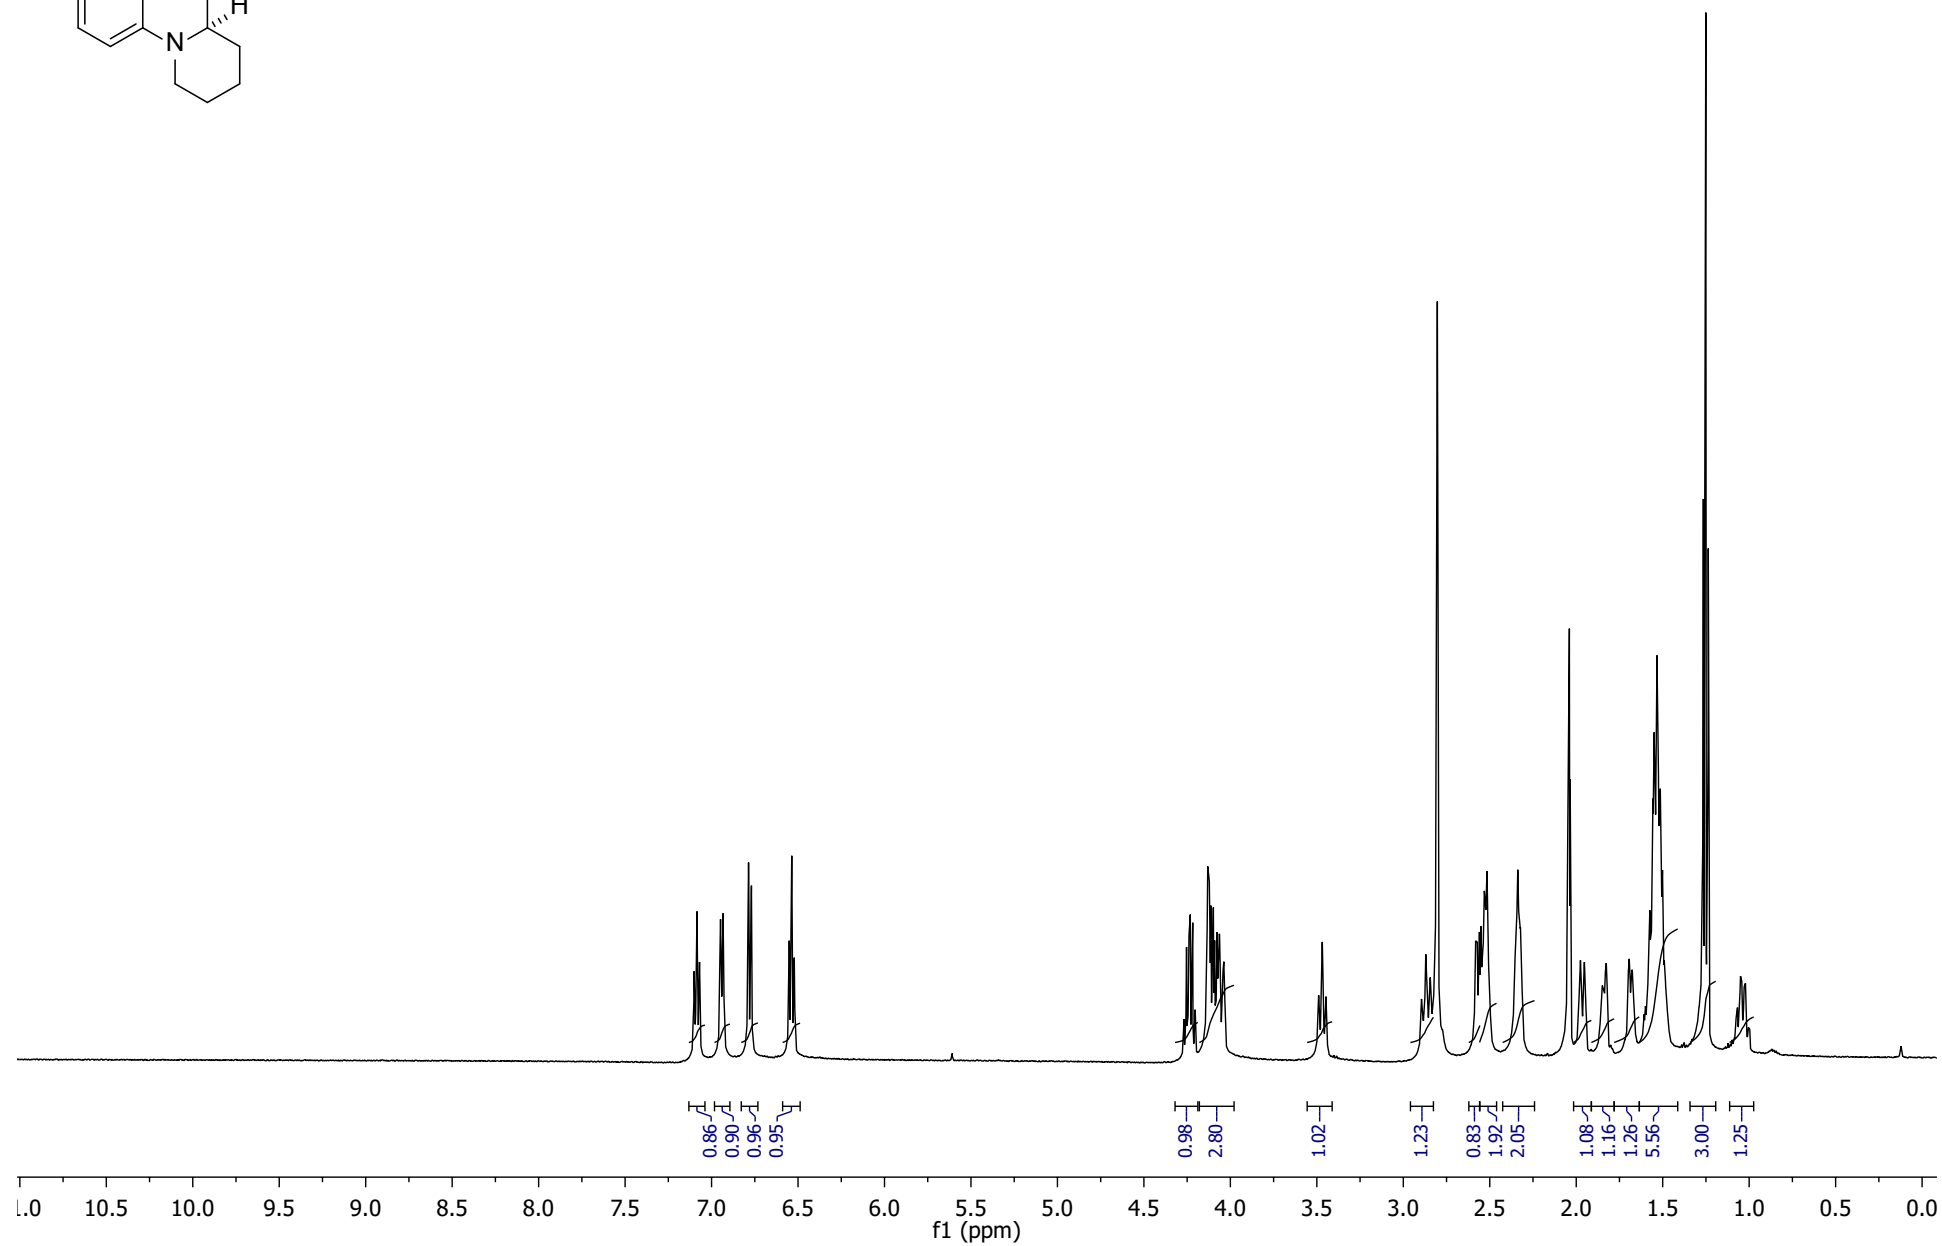



$^{13}\text{C}$  NMR of **12** in  $\text{CDCl}_3$

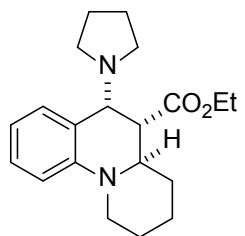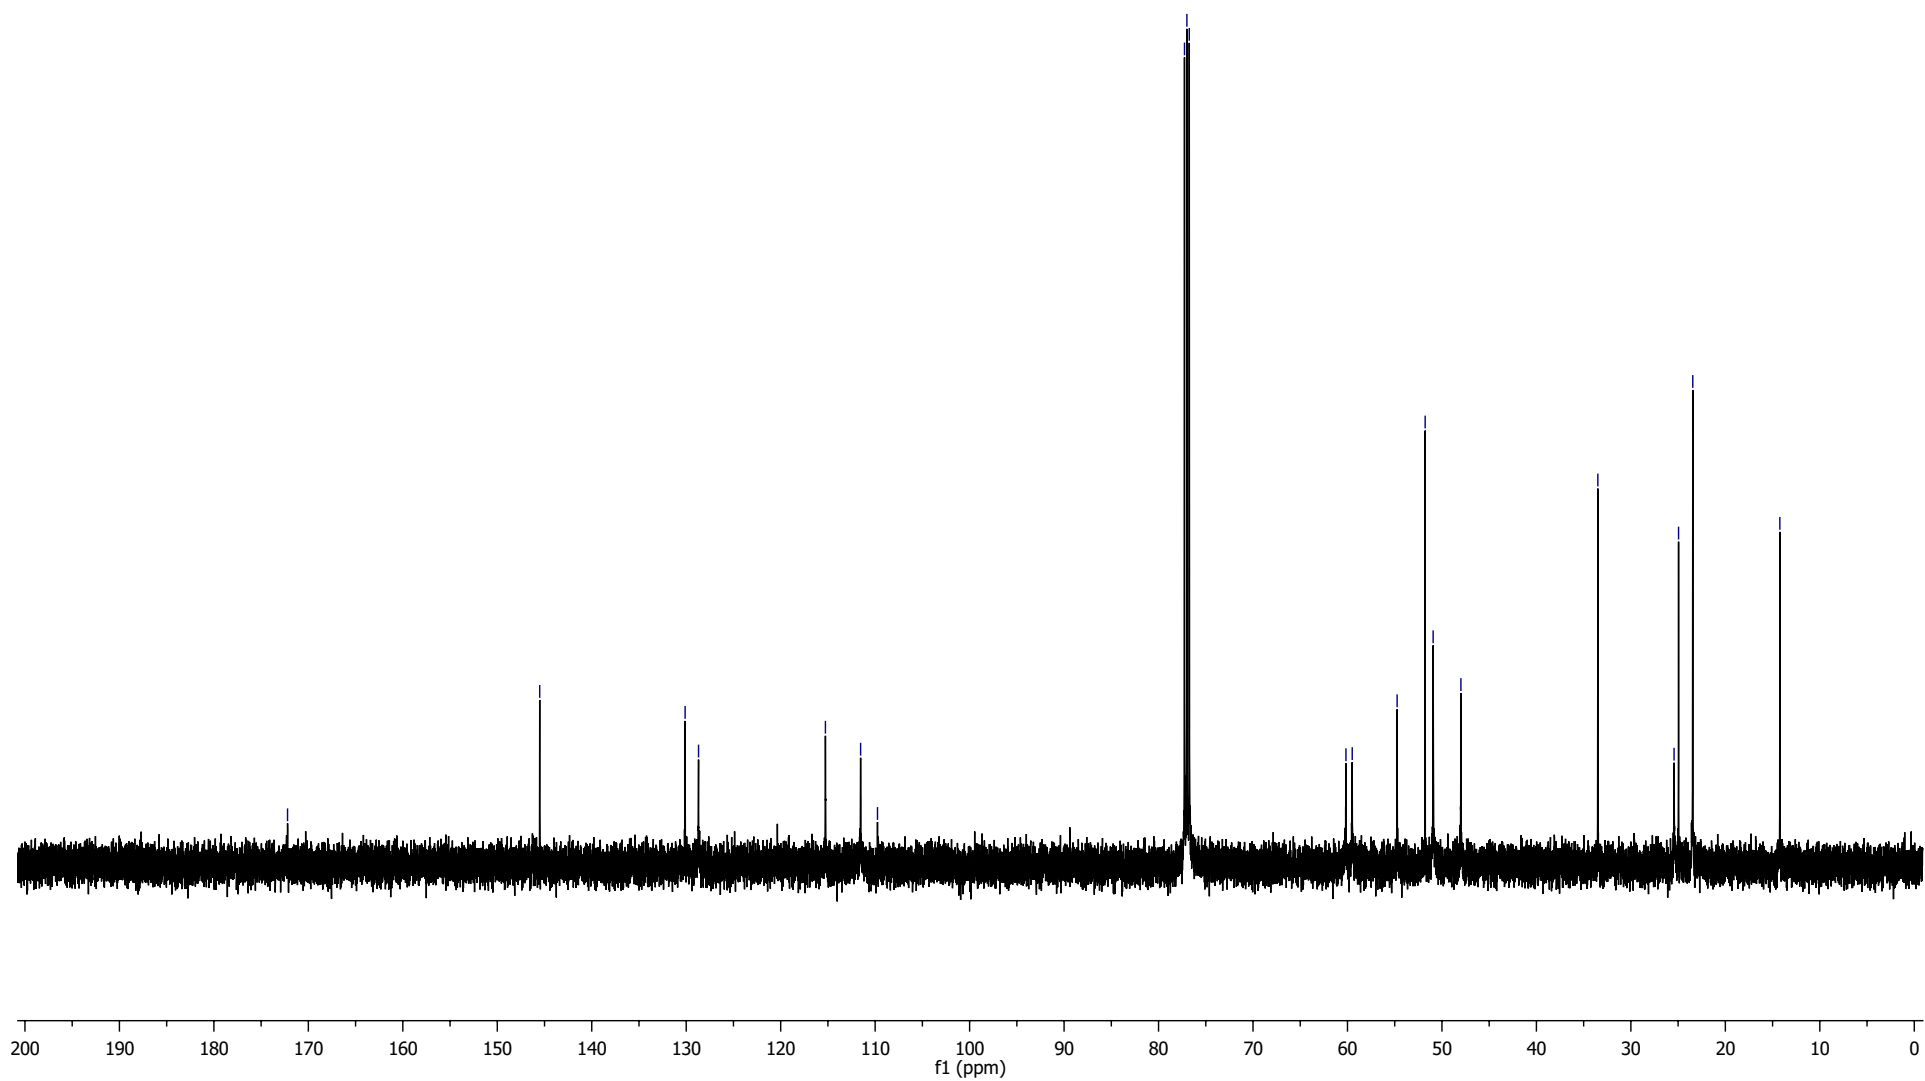

GCOSY of **12** in  $(\text{CD}_3)_2\text{CO}$

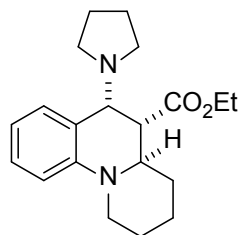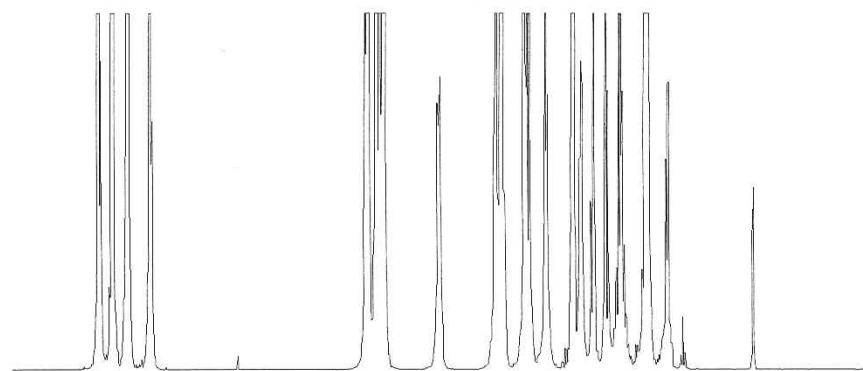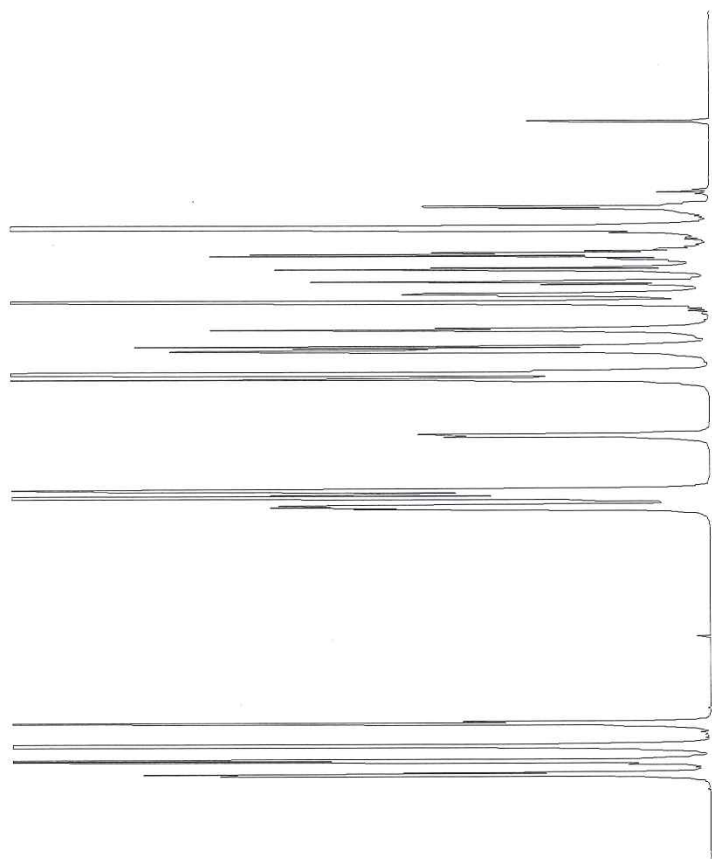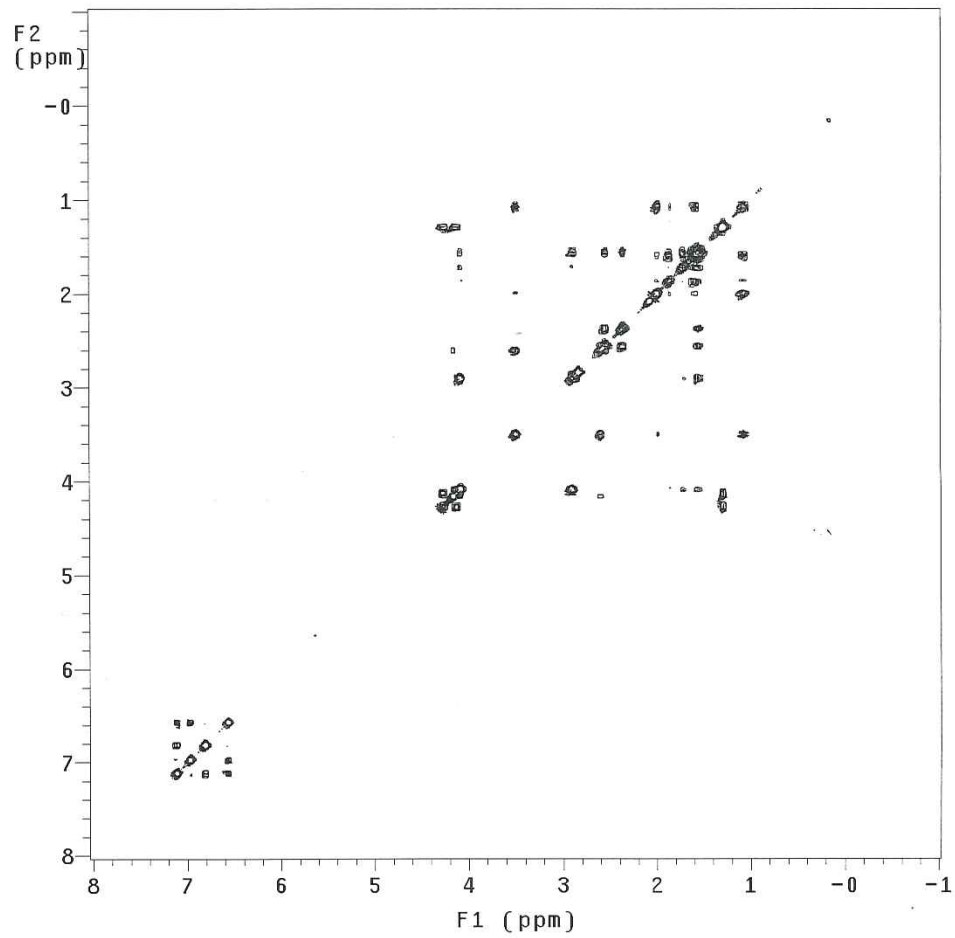

GCOSY of **12** in  $(\text{CD}_3)_2\text{CO}$  (zoomed)

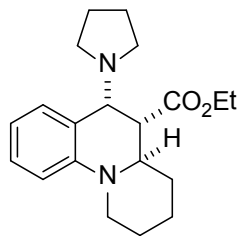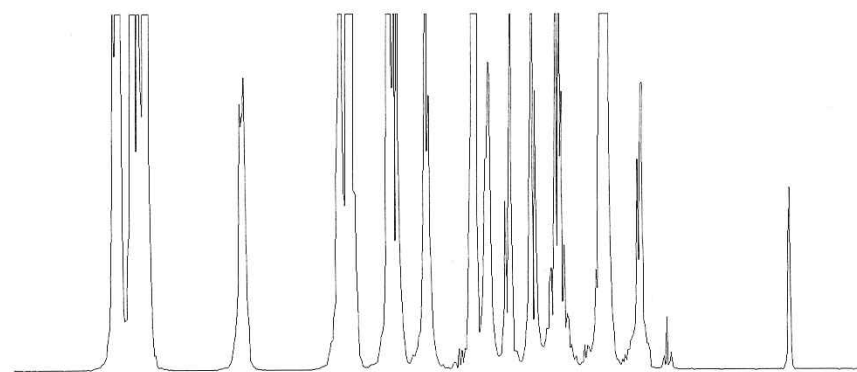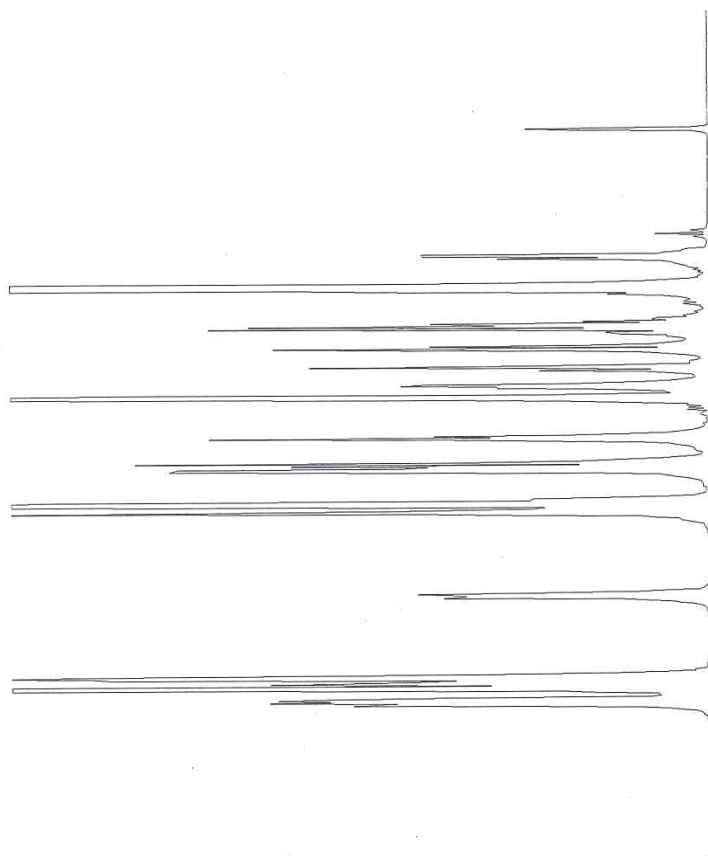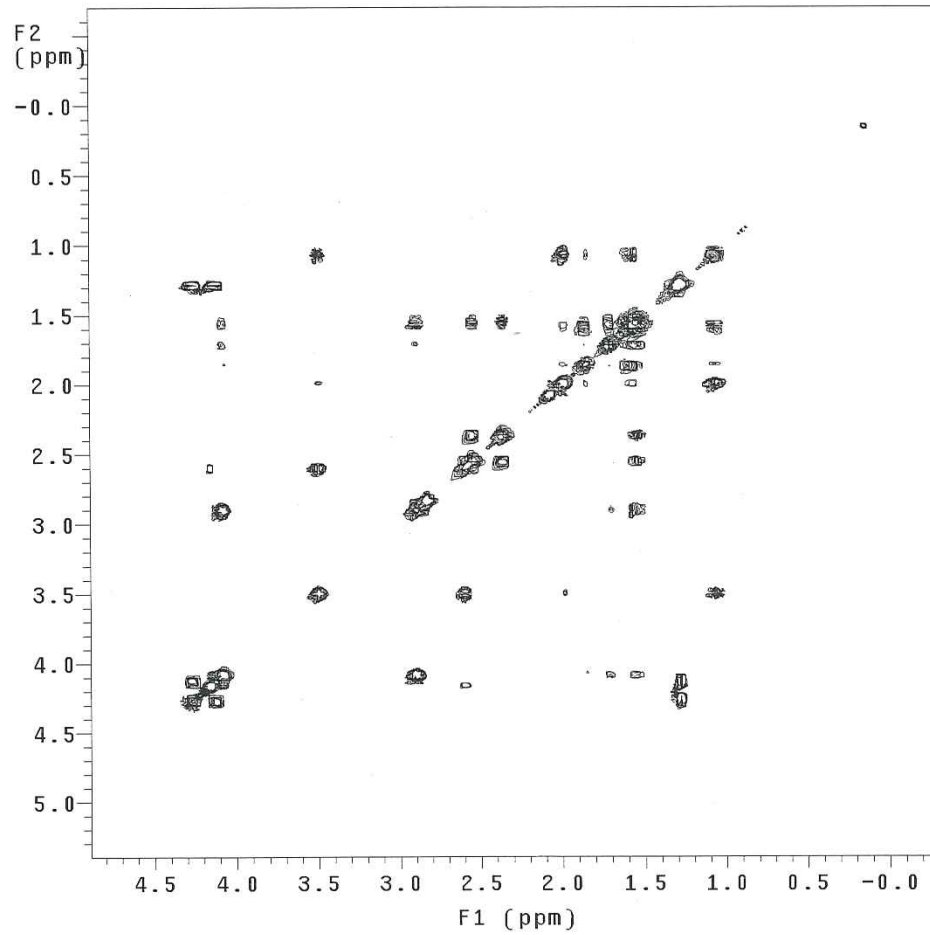

NOESY of **12** in  $(\text{CD}_3)_2\text{CO}$

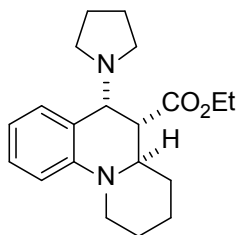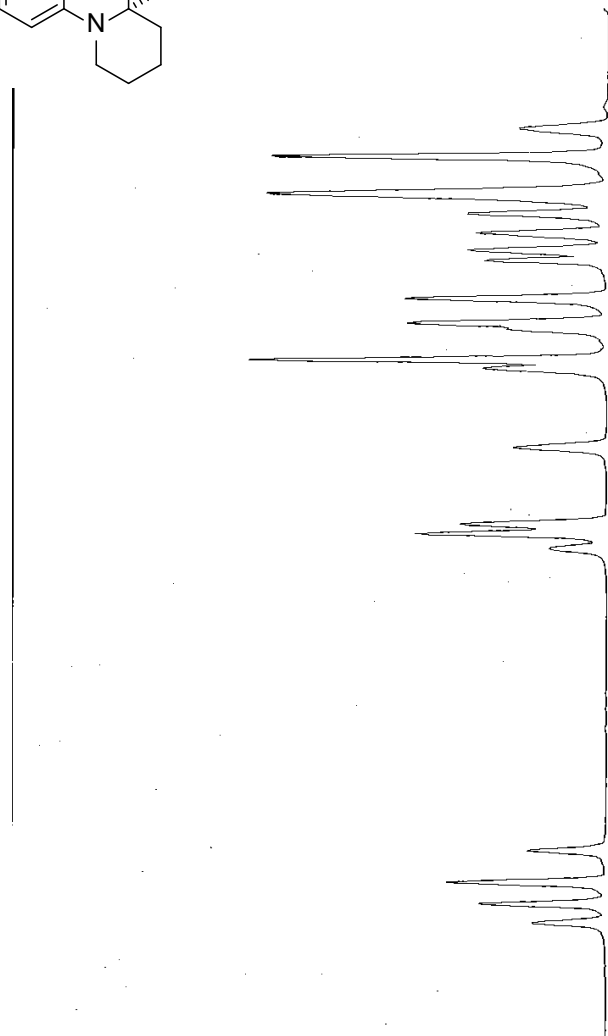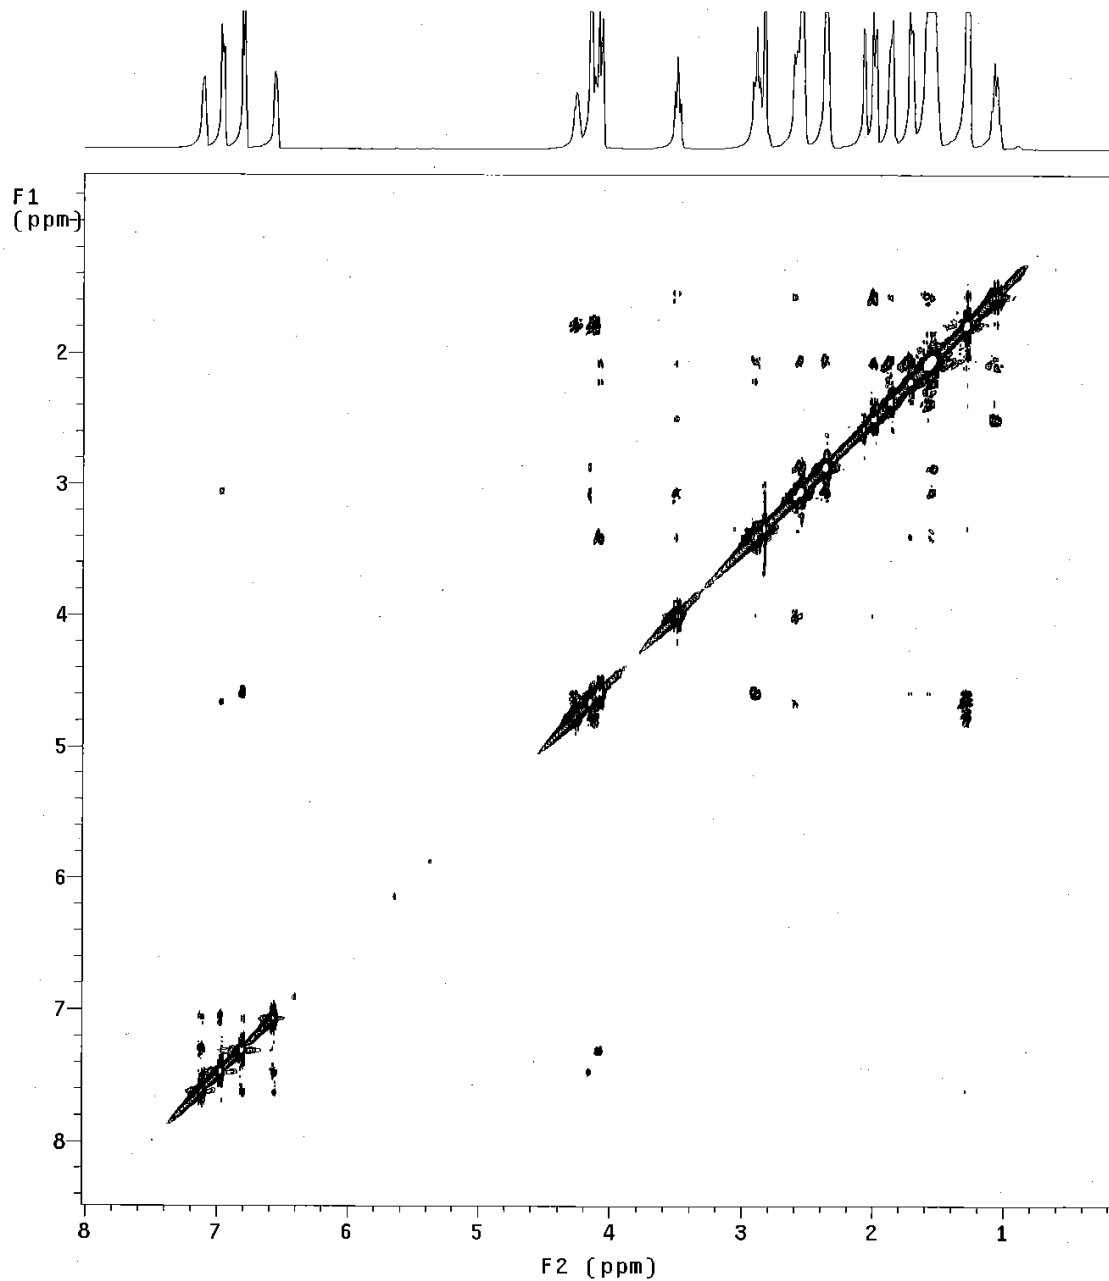

NOESY of **12** in  $(\text{CD}_3)_2\text{CO}$  (zoomed)

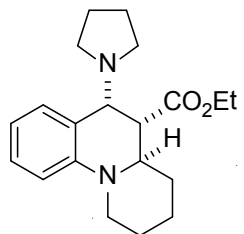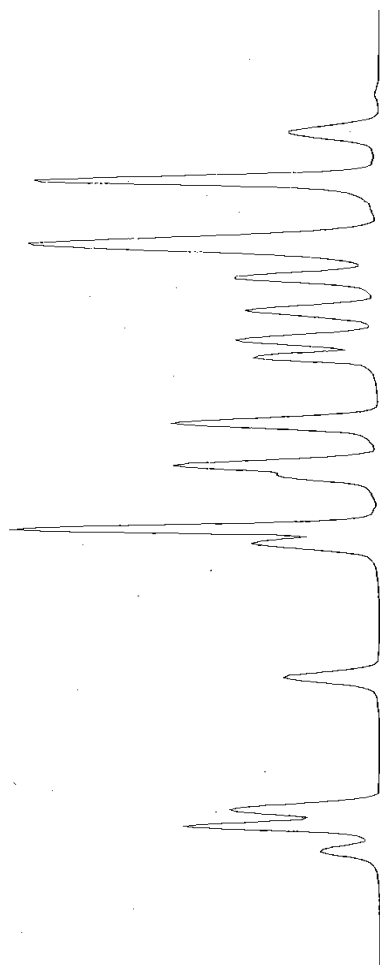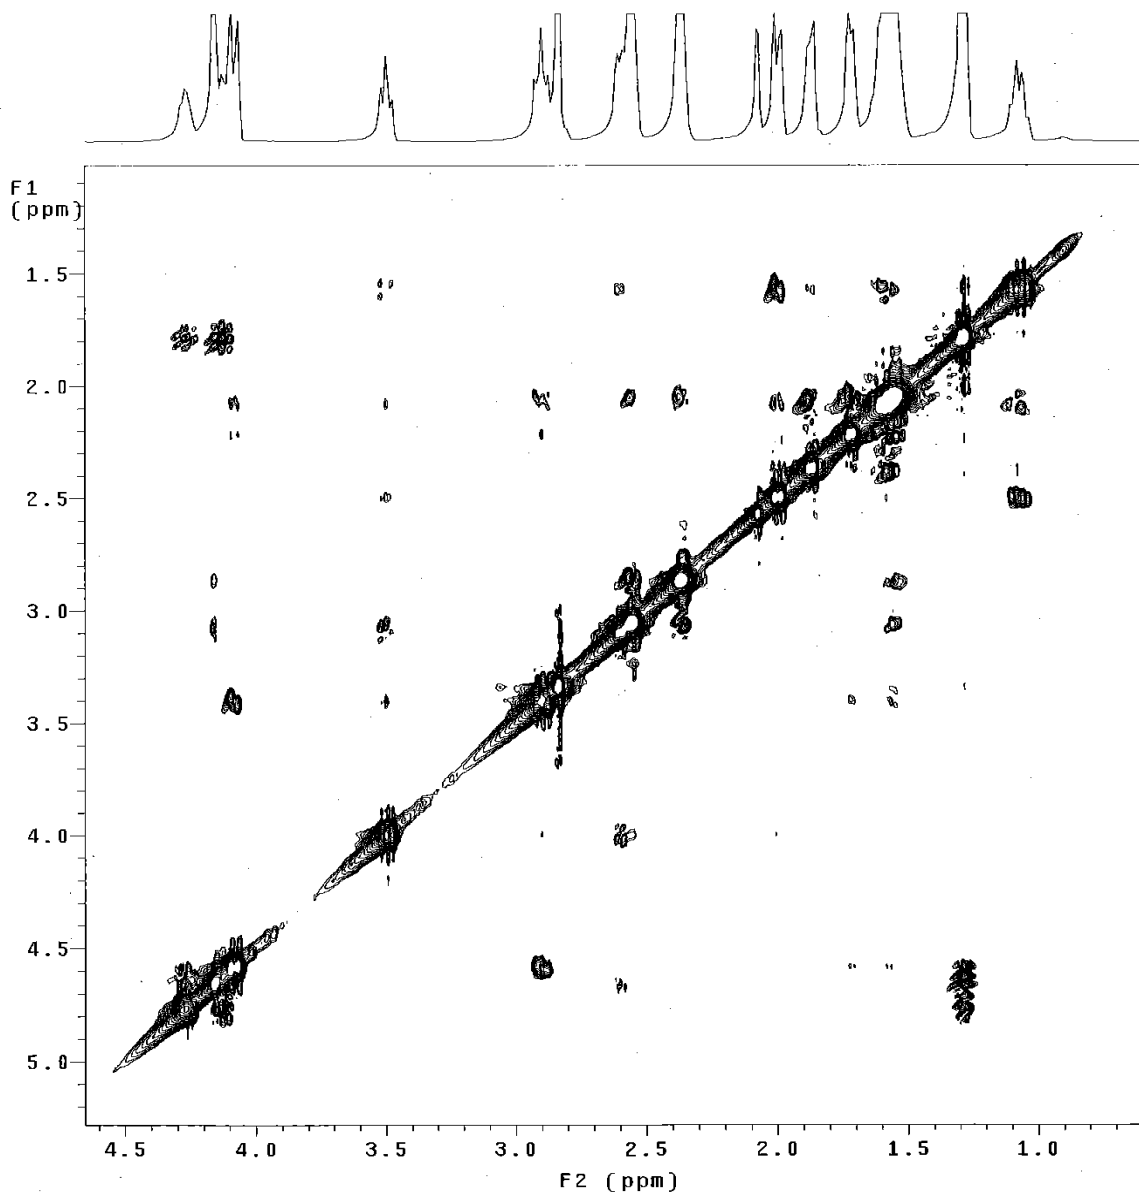

$^1\text{H}$  NMR of **13** in  $\text{CDCl}_3$

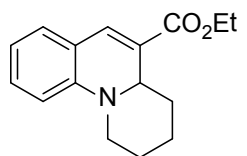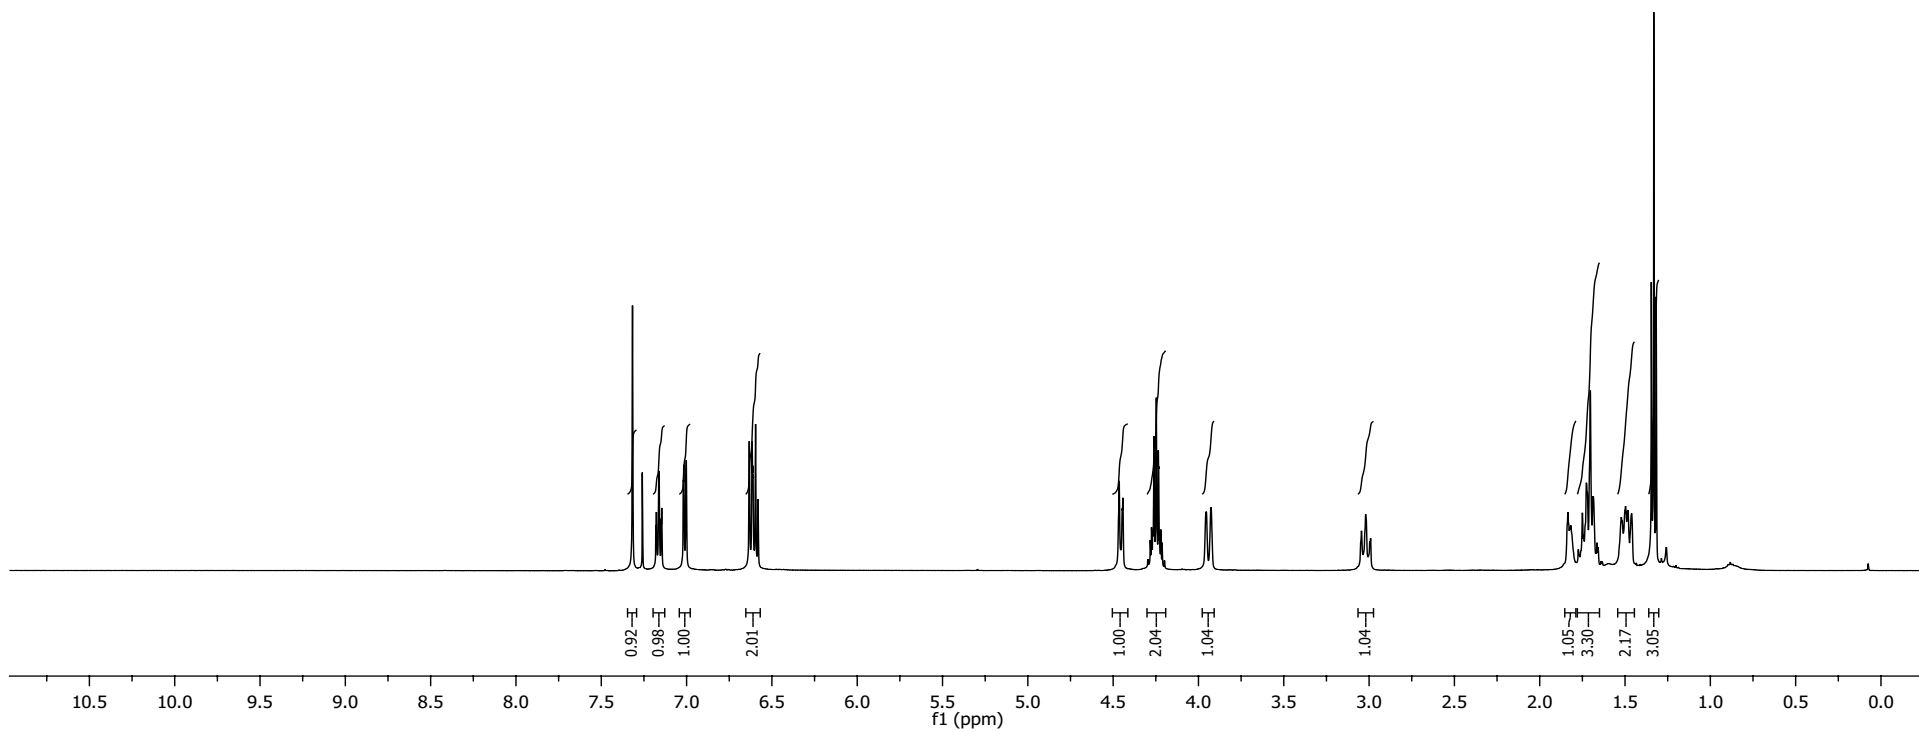

$^{13}\text{C}$  NMR of **13** in  $\text{CDCl}_3$

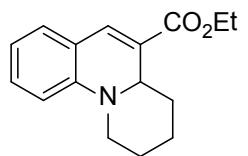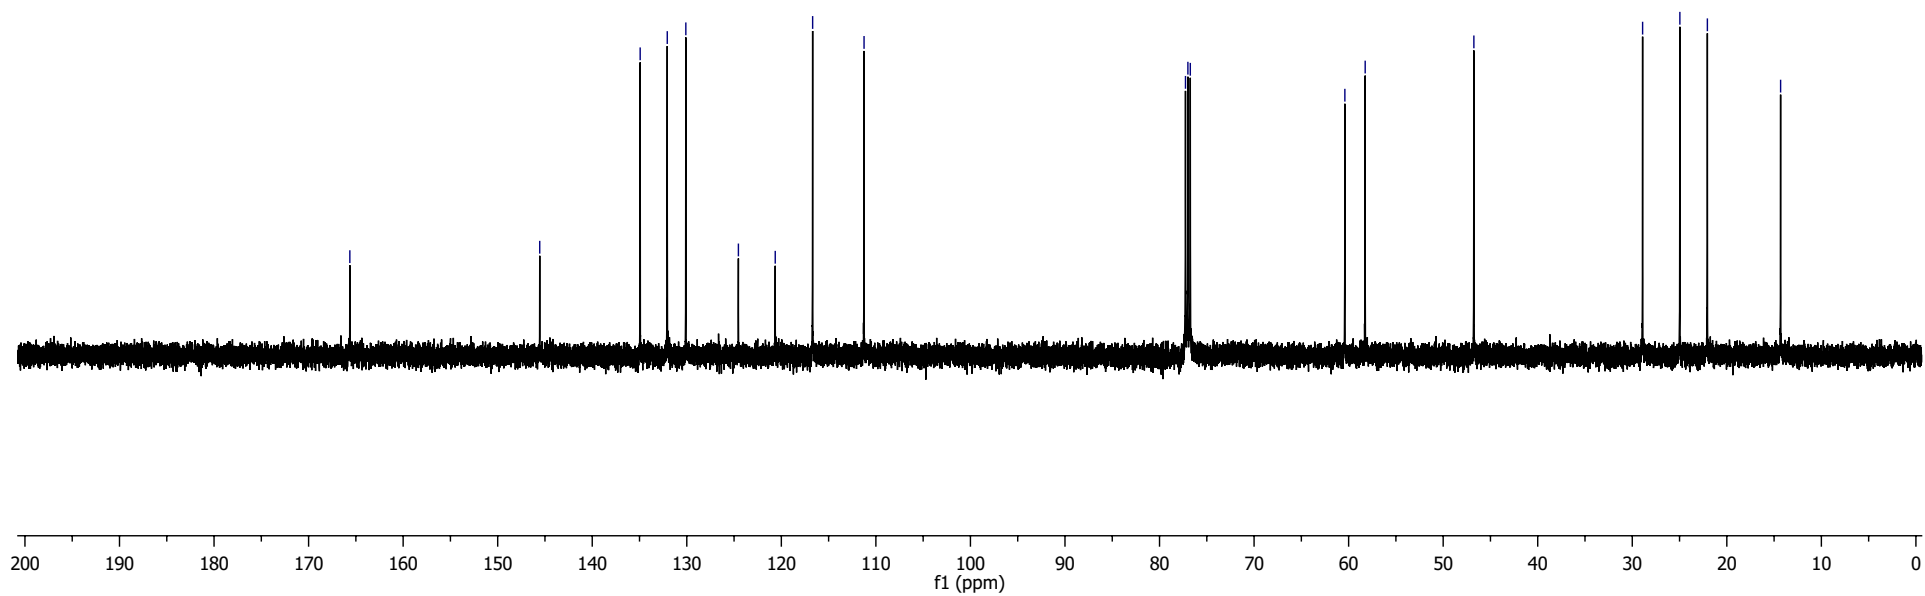

<sup>1</sup>H NMR of **14** in CDCl<sub>3</sub>

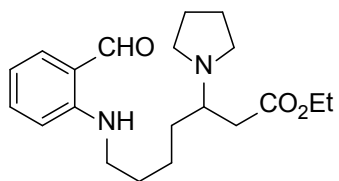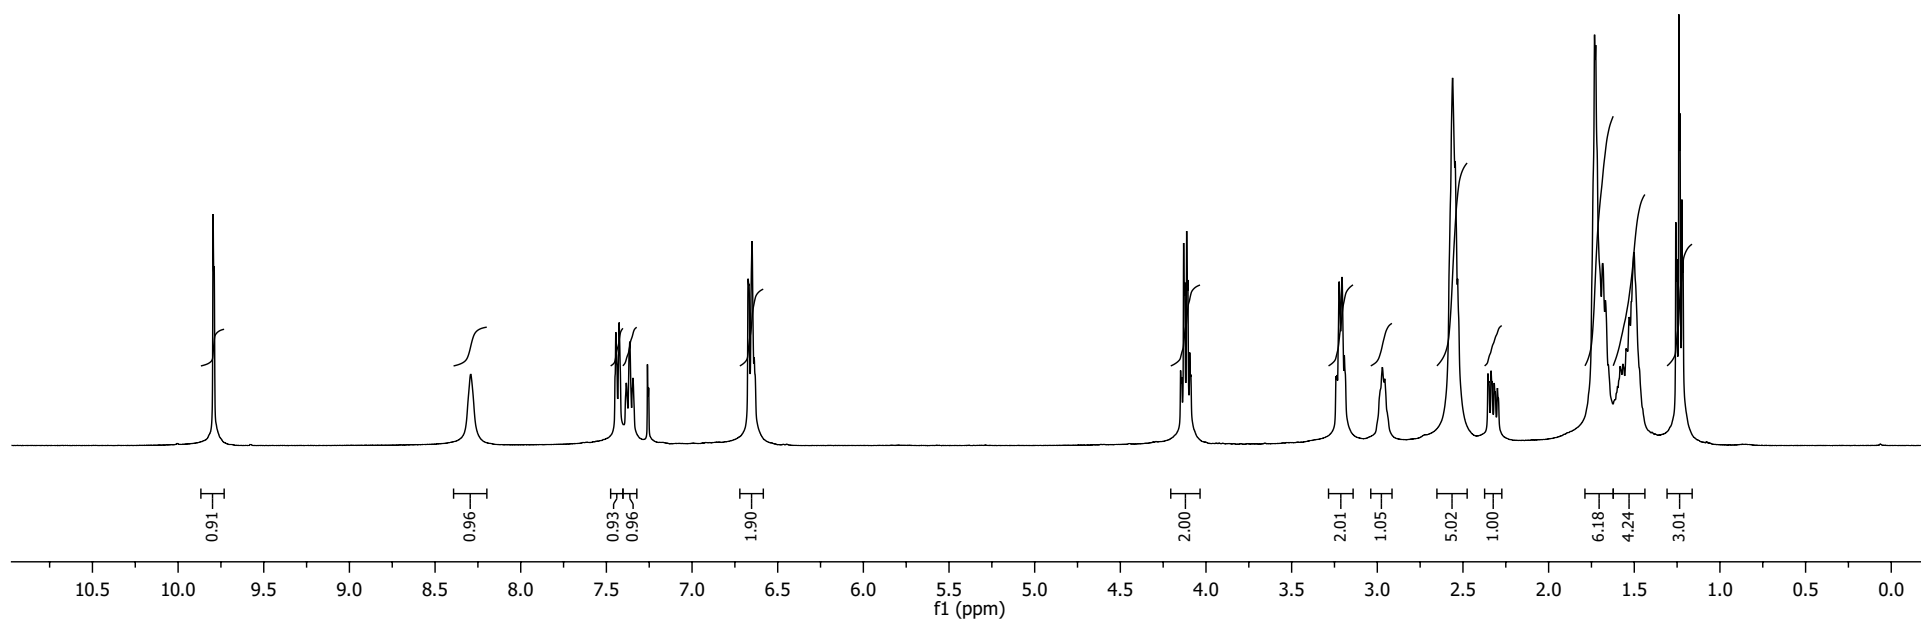



$^{13}\text{C}$  NMR of **14** in  $\text{CDCl}_3$

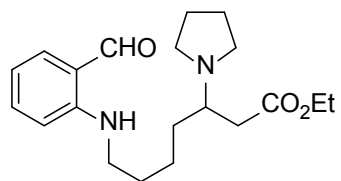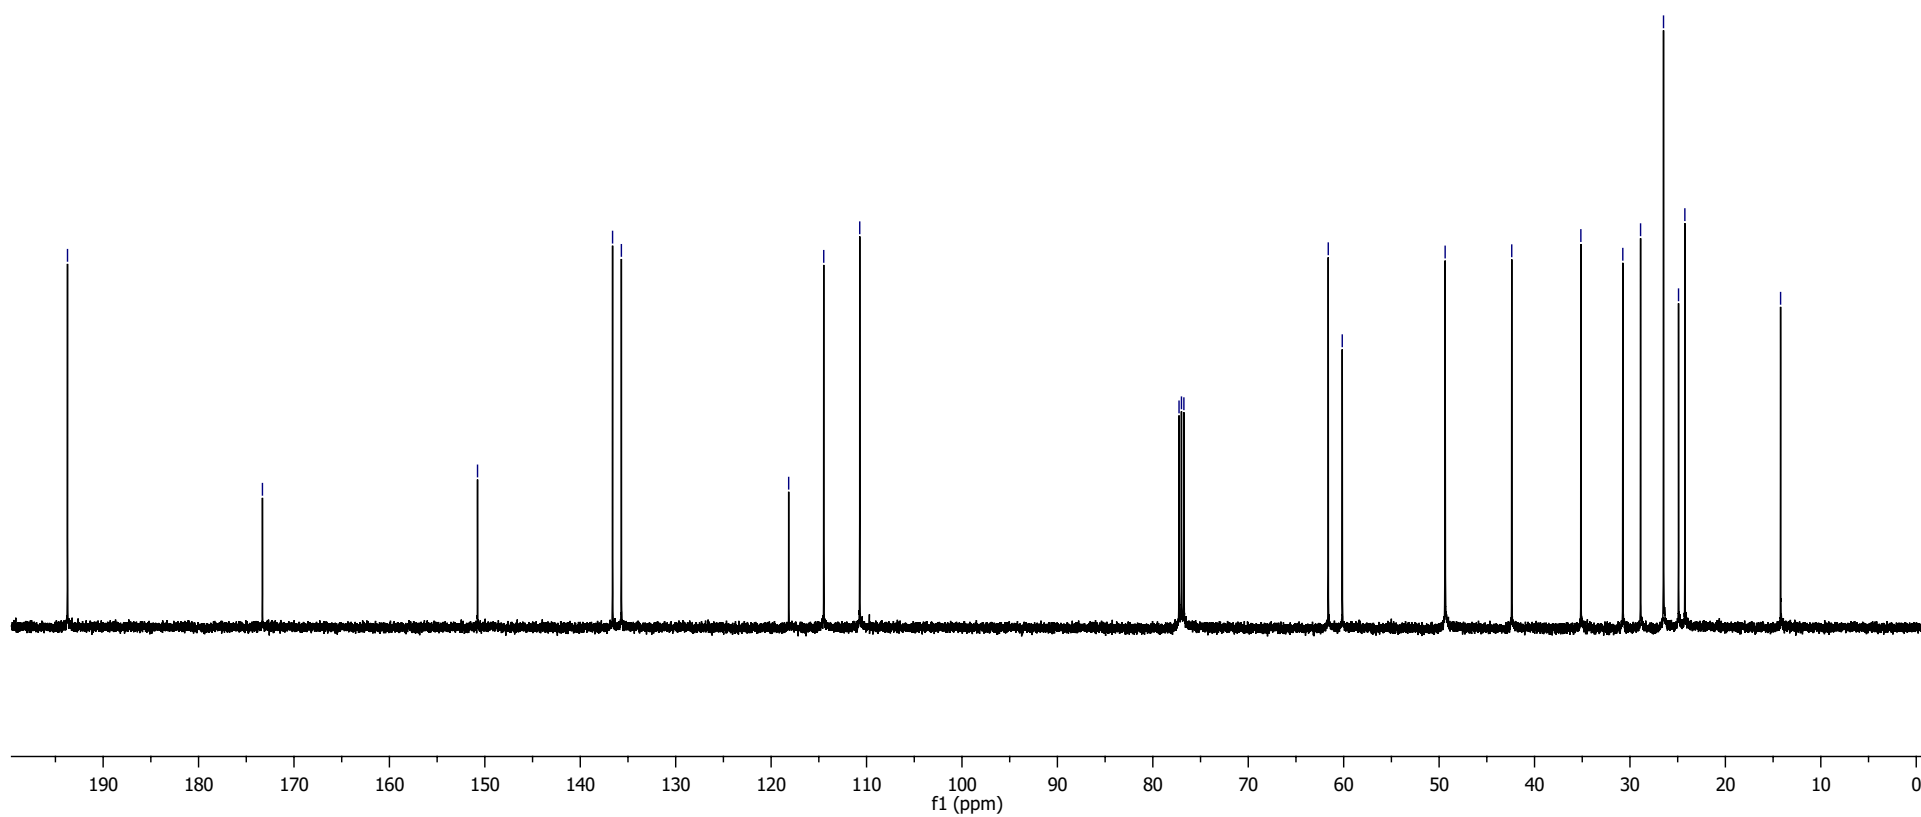

<sup>1</sup>H NMR of **15** in CDCl<sub>3</sub>

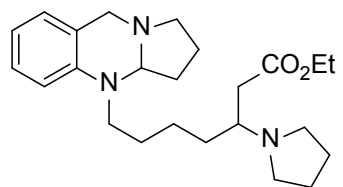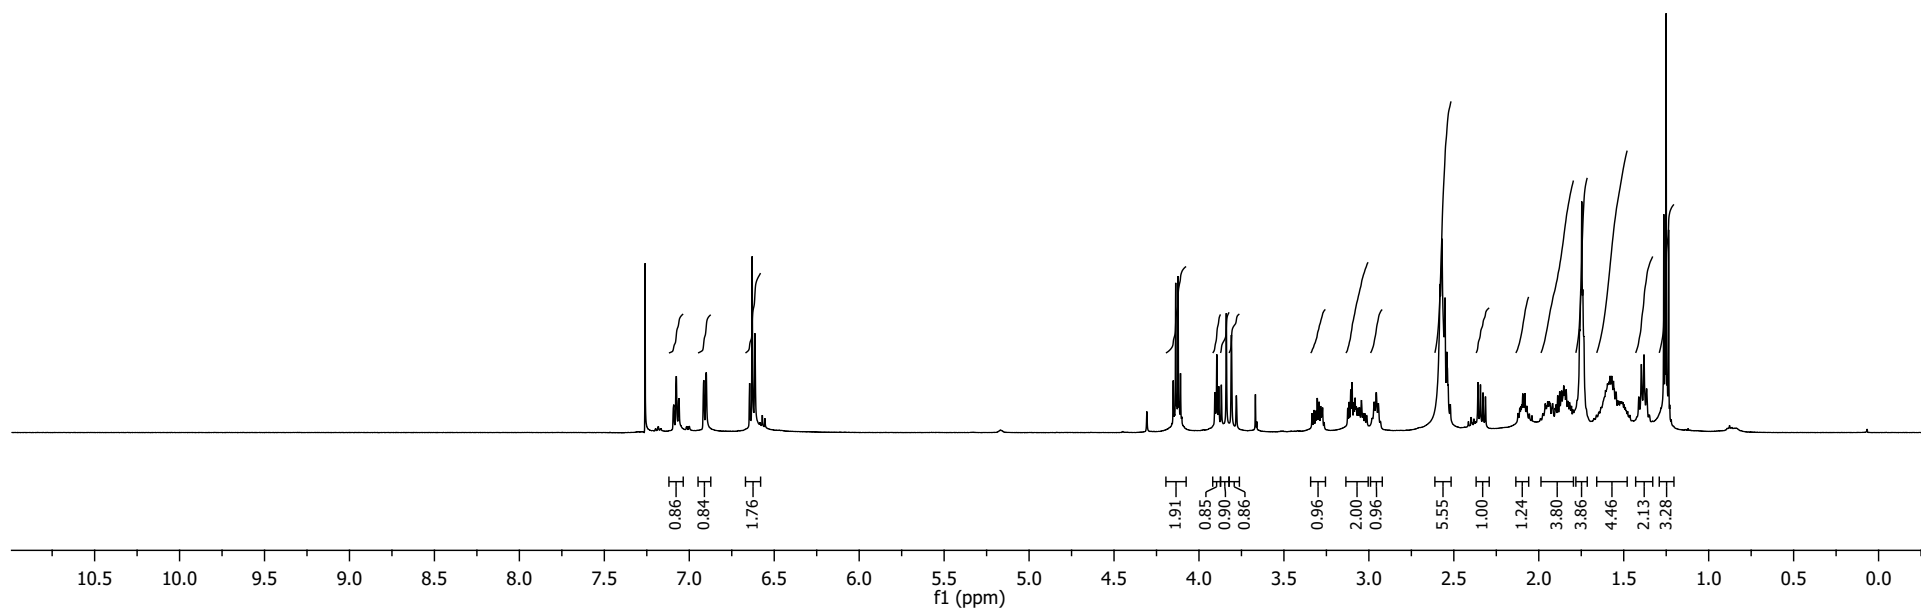

$^{13}\text{C}$  NMR of **15** in  $\text{CDCl}_3$

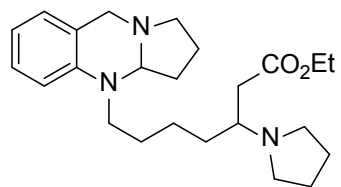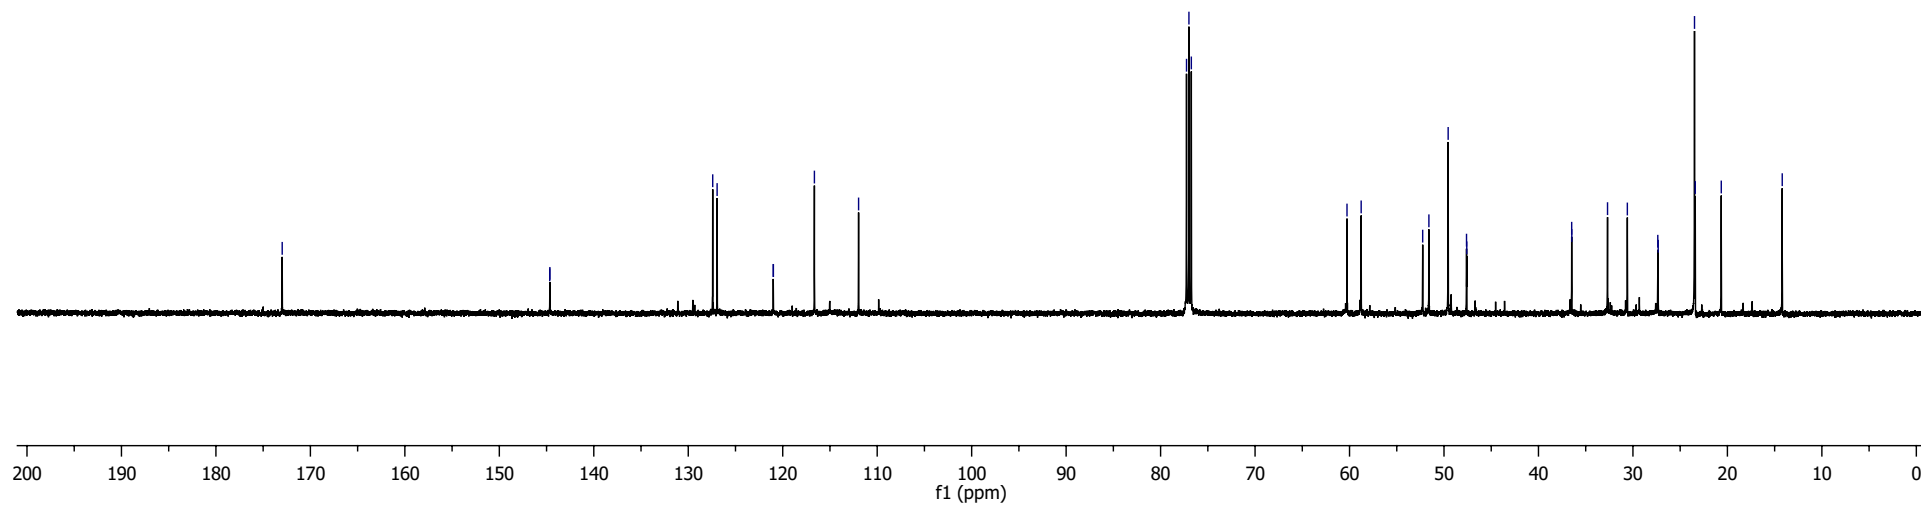

$^1\text{H}$  NMR of **18** in  $\text{CDCl}_3$

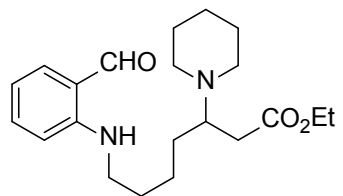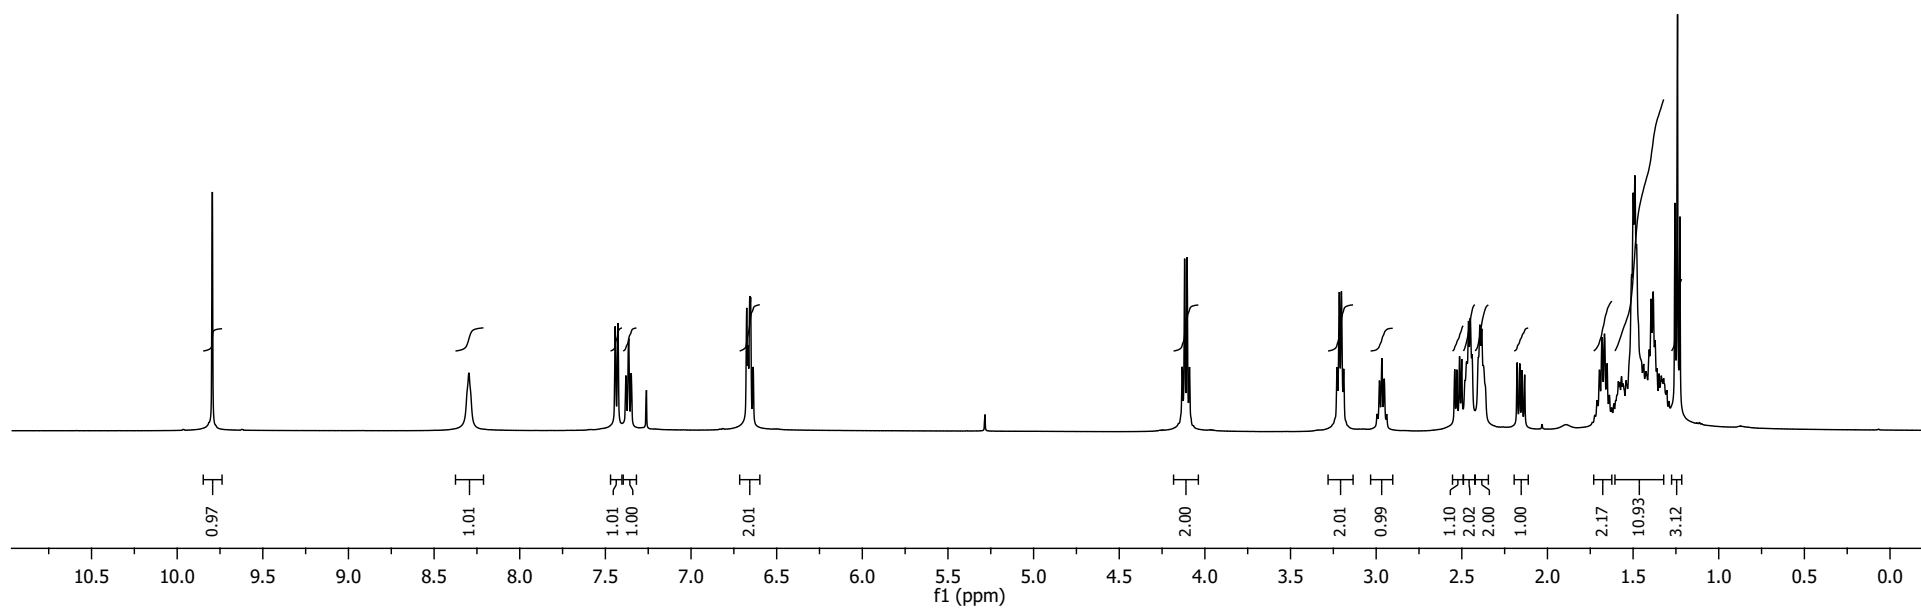

$^{13}\text{C}$  NMR of **18** in  $\text{CDCl}_3$

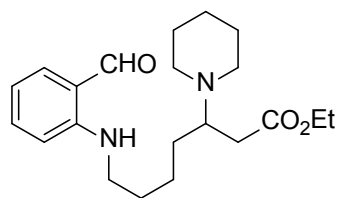

$^1\text{H}$  NMR of **20** in  $\text{CDCl}_3$

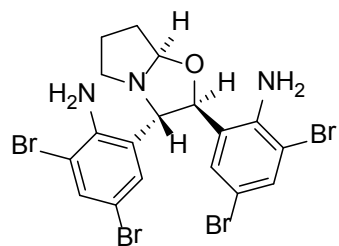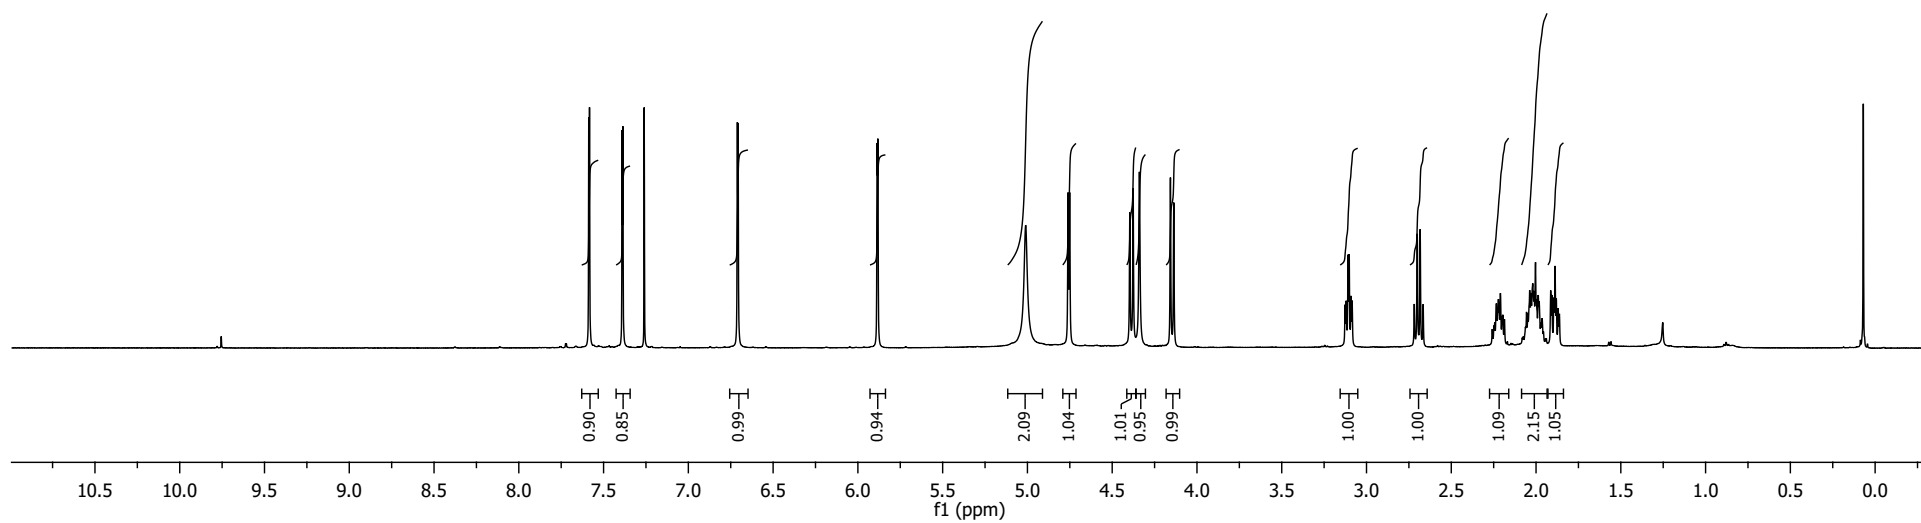

$^{13}\text{C}$  NMR of **20** in  $\text{CDCl}_3$

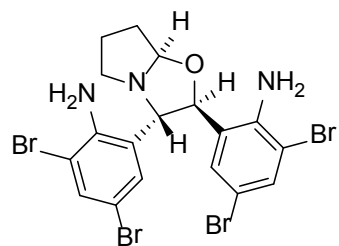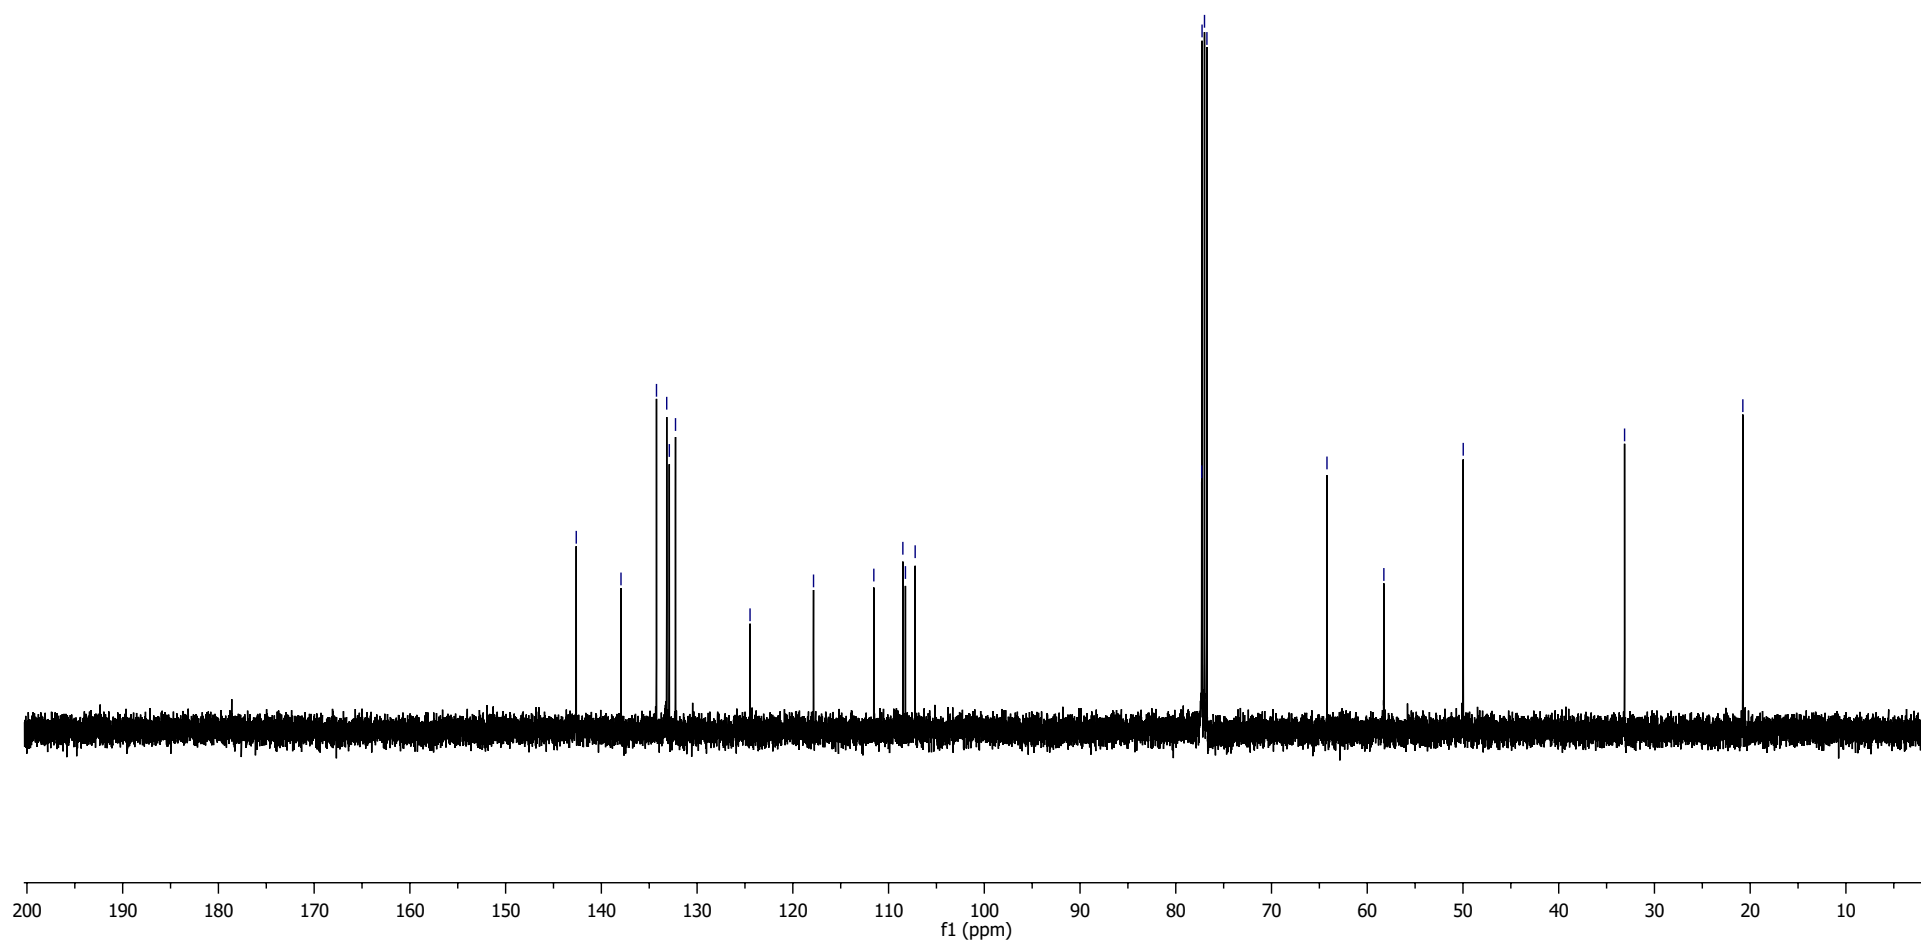

NOESY of **20** in CDCl<sub>3</sub>

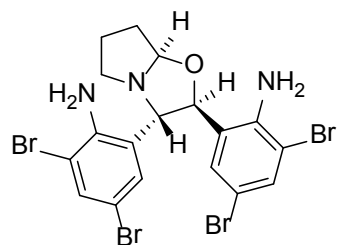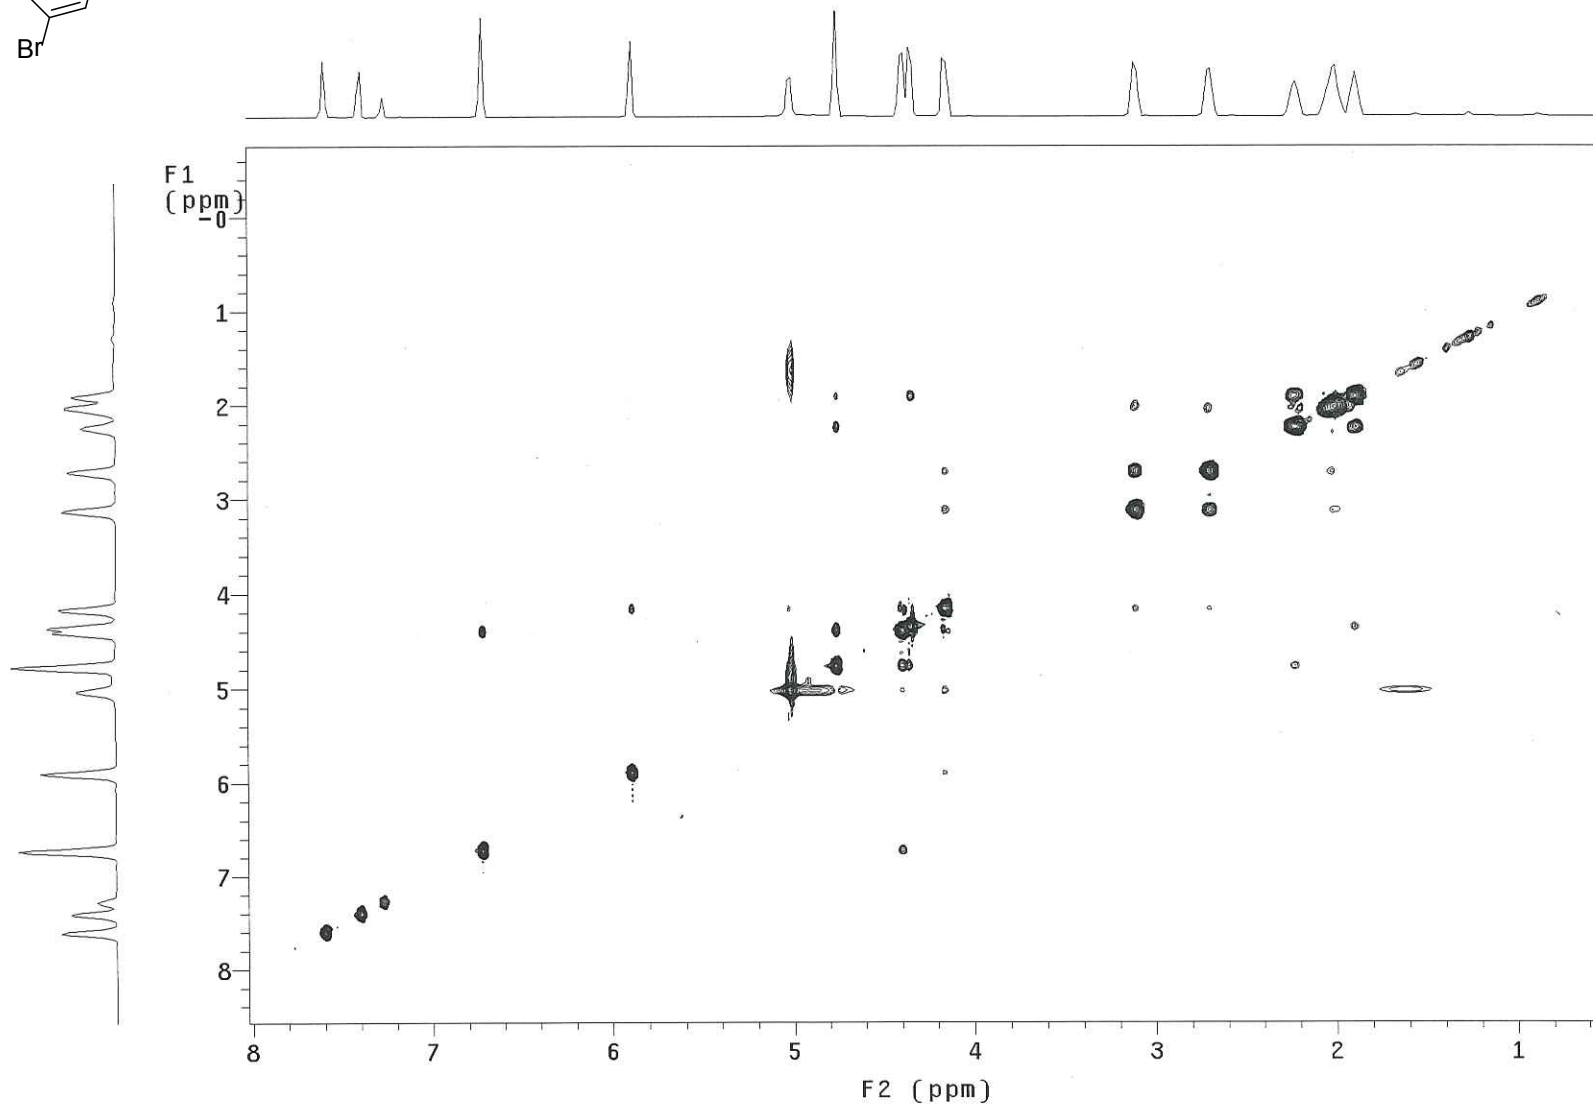



NOESY of **20** in CDCl<sub>3</sub> (zoomed)

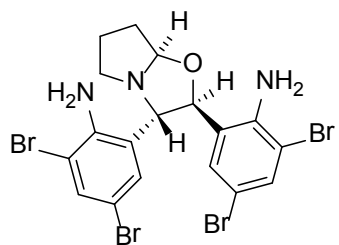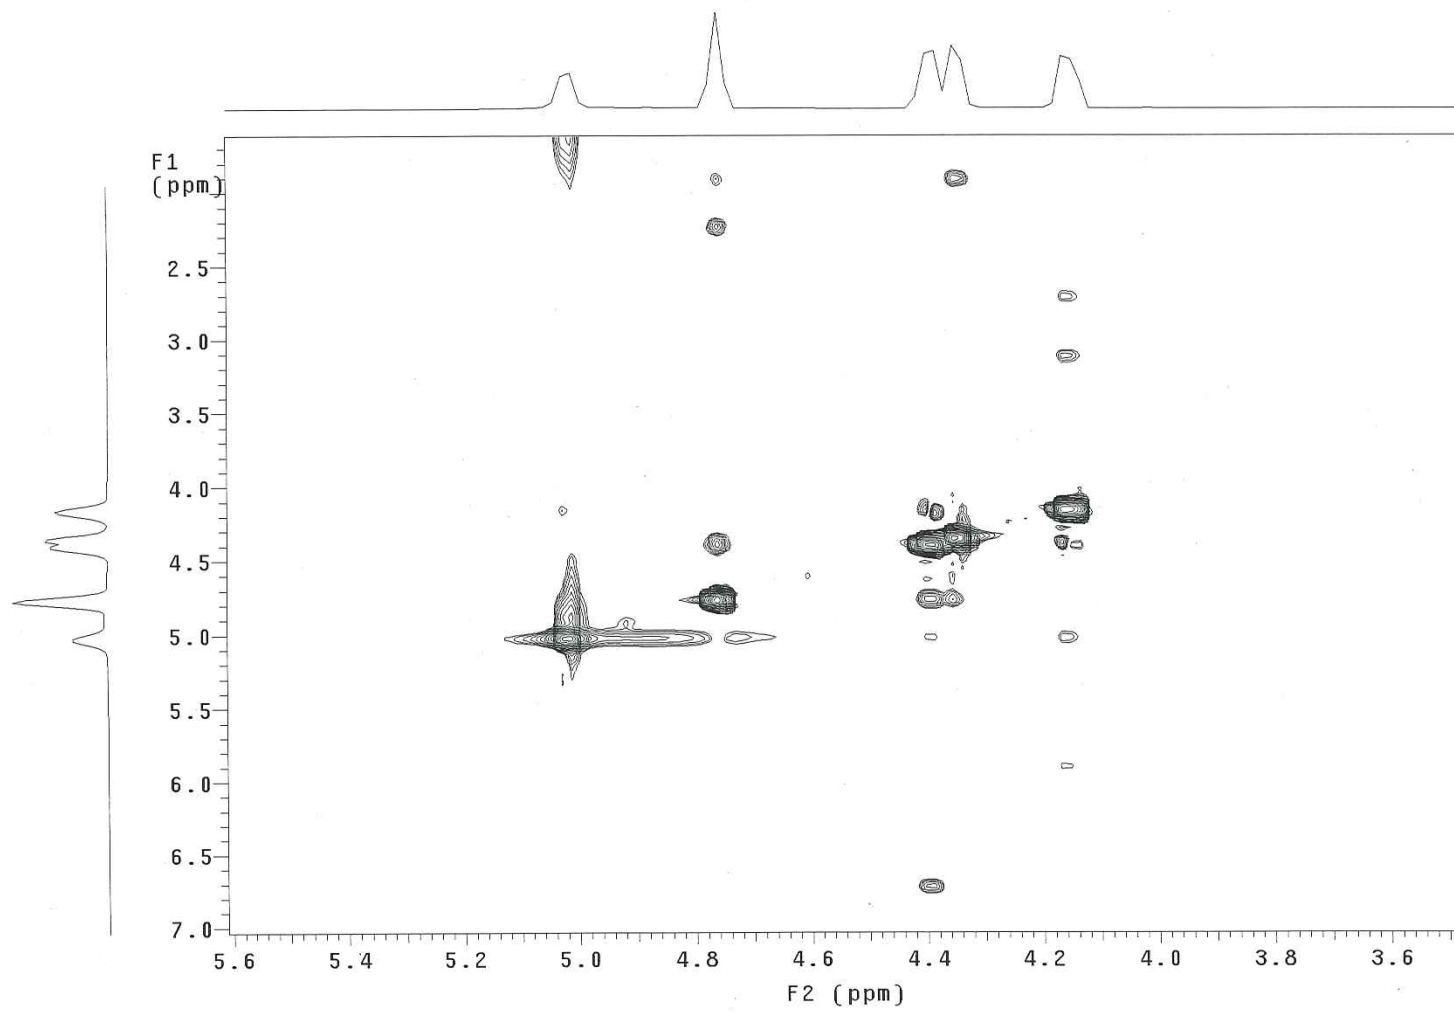

$^1\text{H}$  NMR of **2a-6** in  $\text{CDCl}_3$

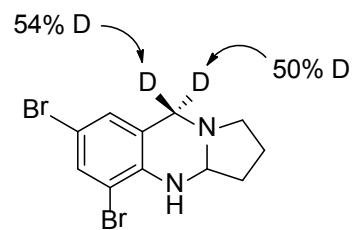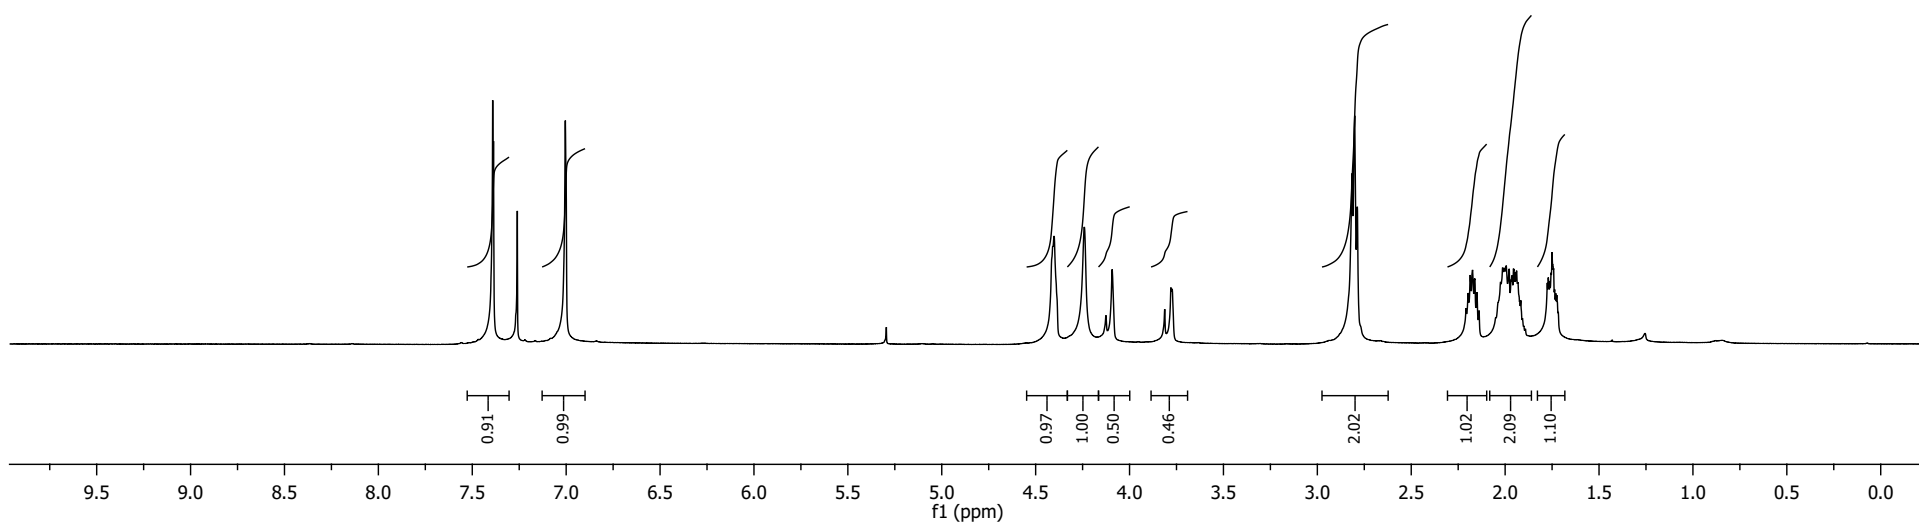

$^1\text{H}$  NMR of **2e-7** in  $\text{CDCl}_3$

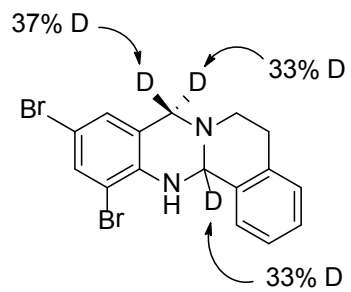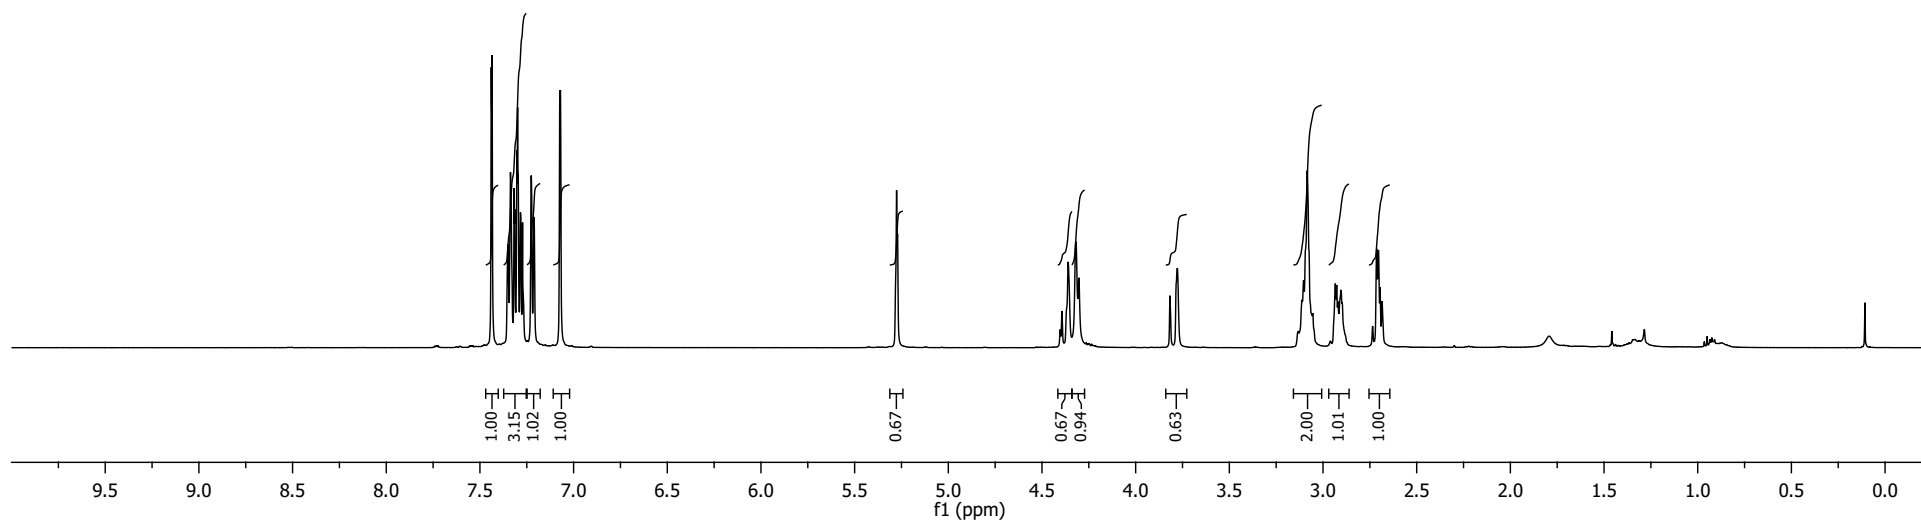

$^1\text{H}$  NMR of **2e-8** in  $\text{CDCl}_3$

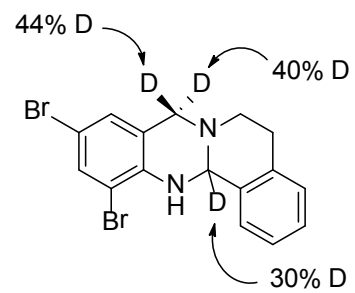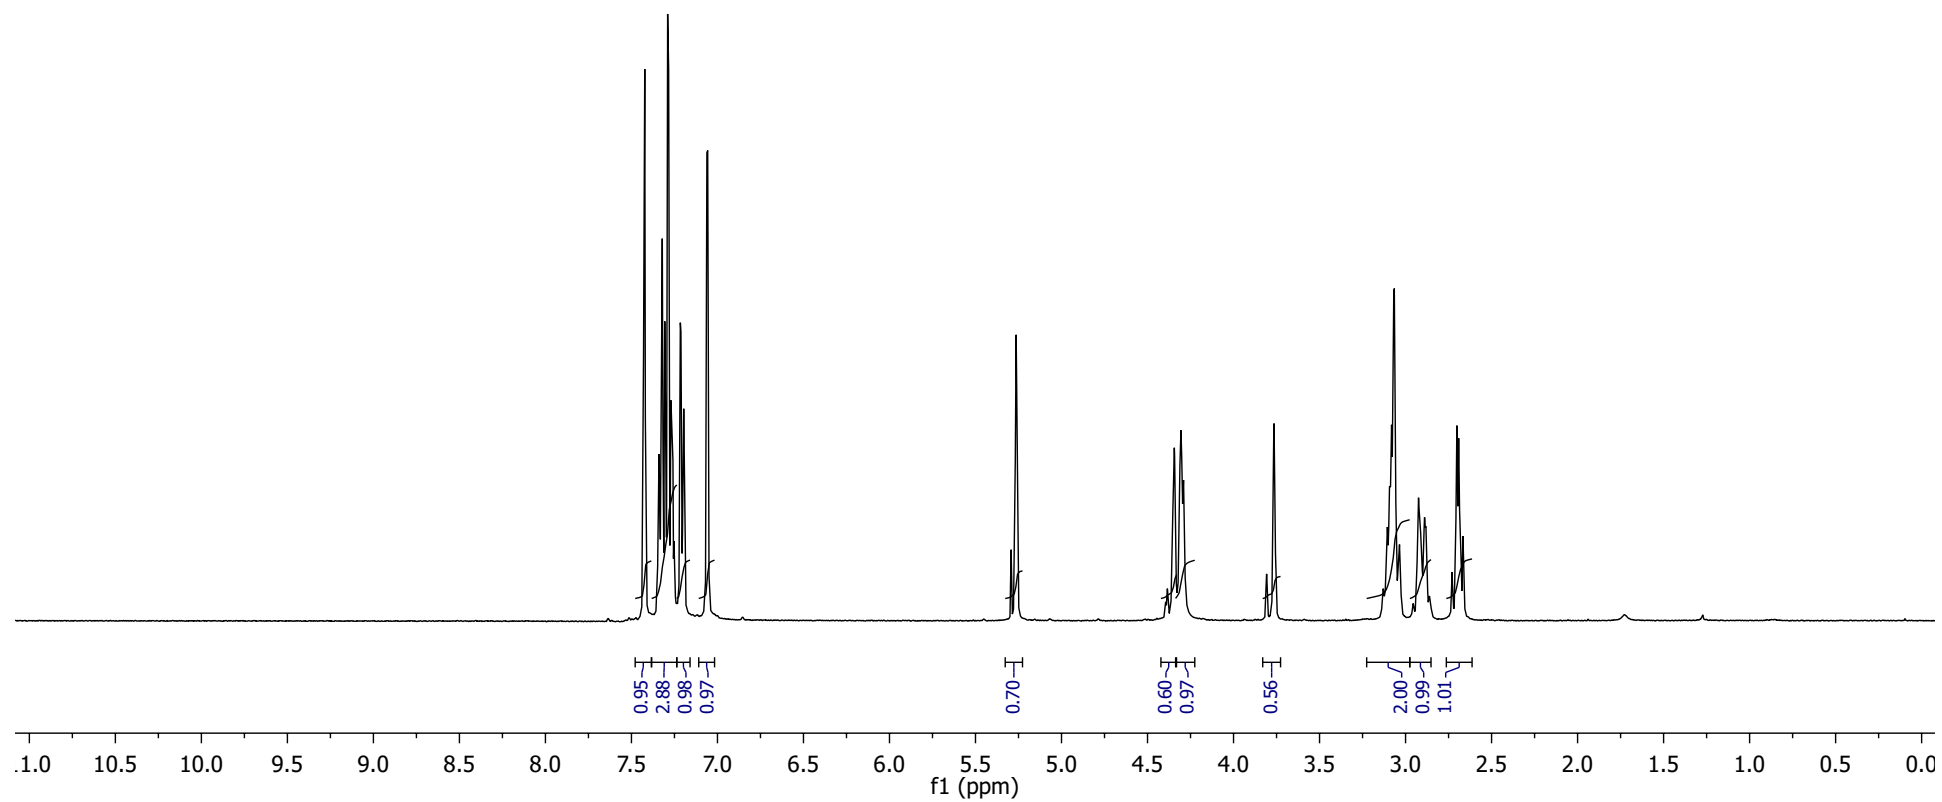

$^1\text{H}$  NMR of **THIQ-d** in  $\text{CDCl}_3$

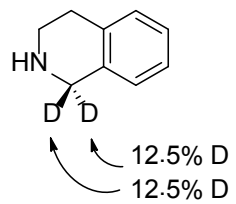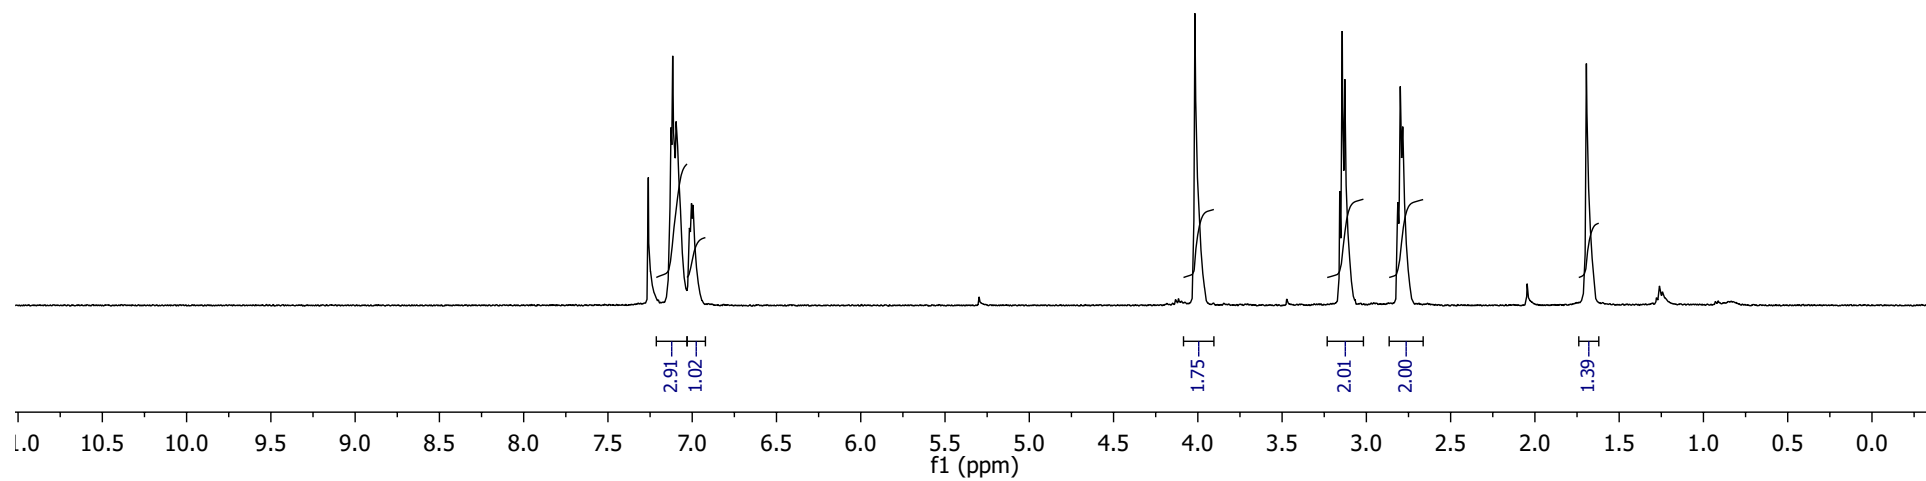

$^1\text{H}$  NMR of **2a-9** in  $\text{CDCl}_3$

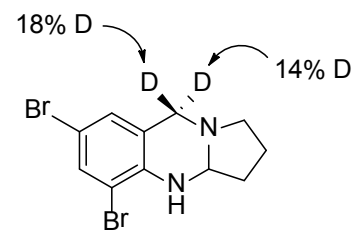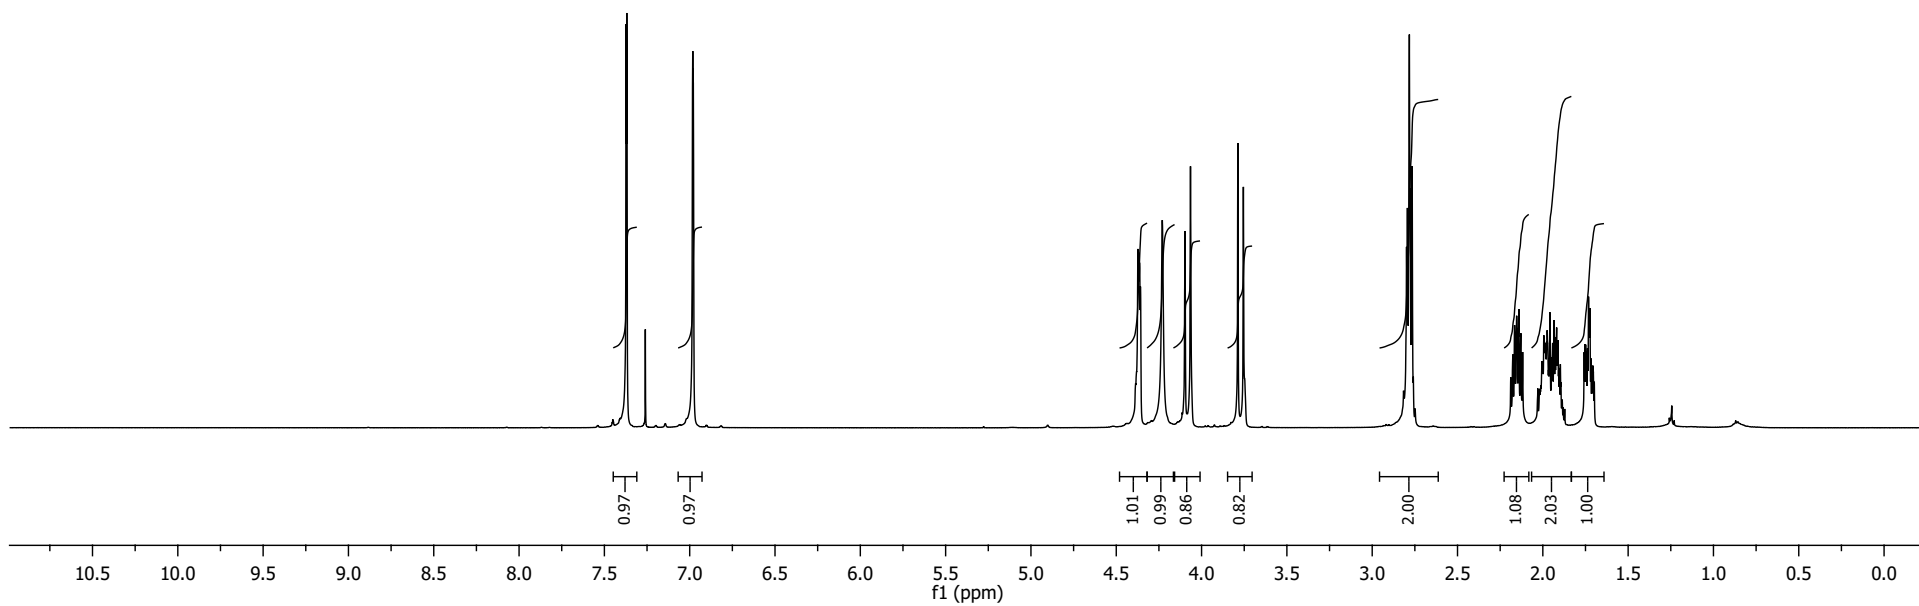

$^1\text{H}$  NMR of **2e-10** in  $\text{CDCl}_3$

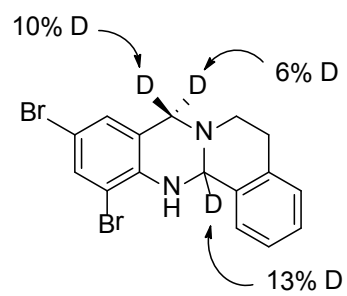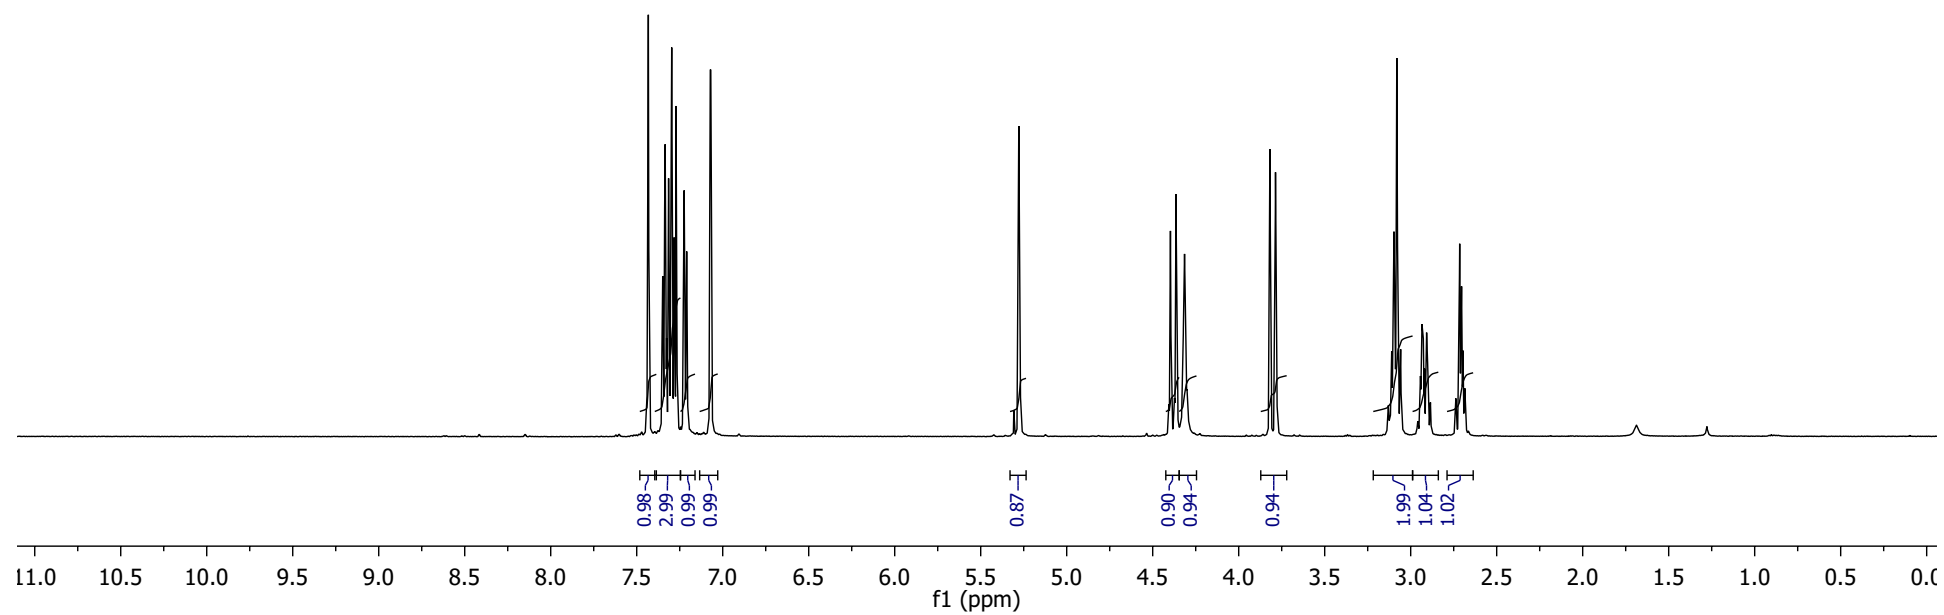

$^1\text{H}$  NMR of **2a-11** in  $\text{CDCl}_3$

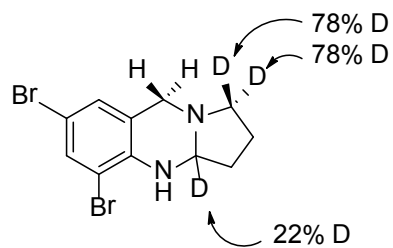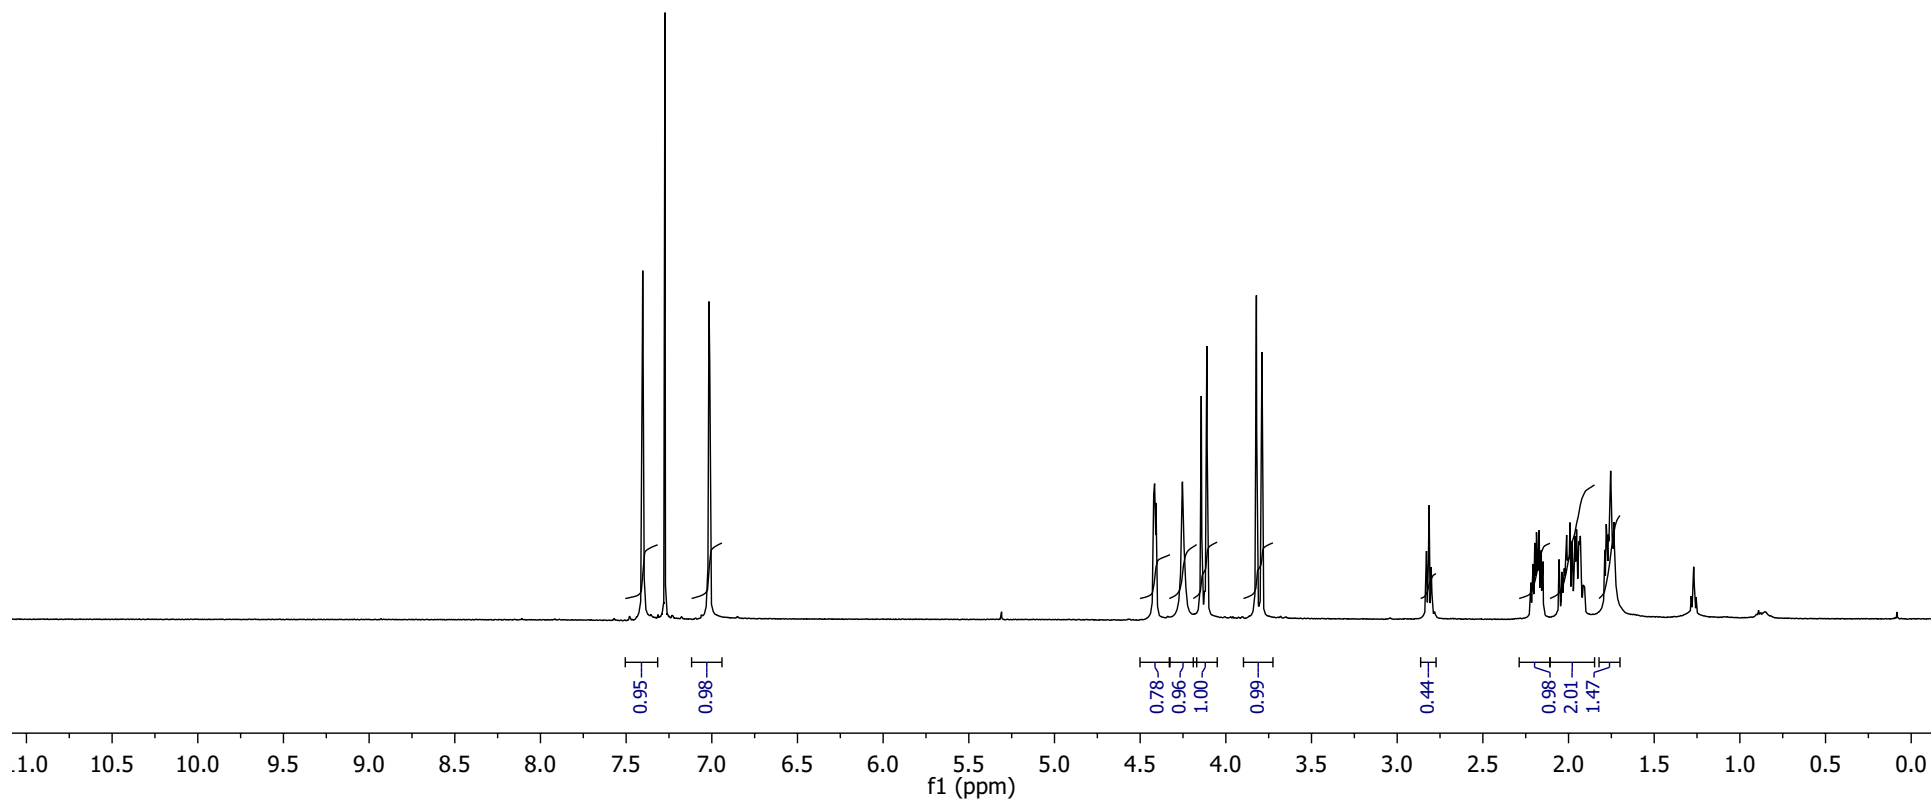



$^1\text{H}$  NMR of **2e-12** in  $\text{CDCl}_3$

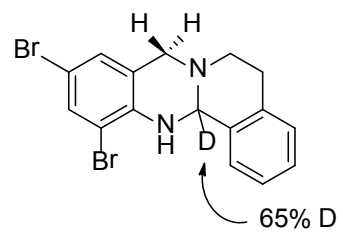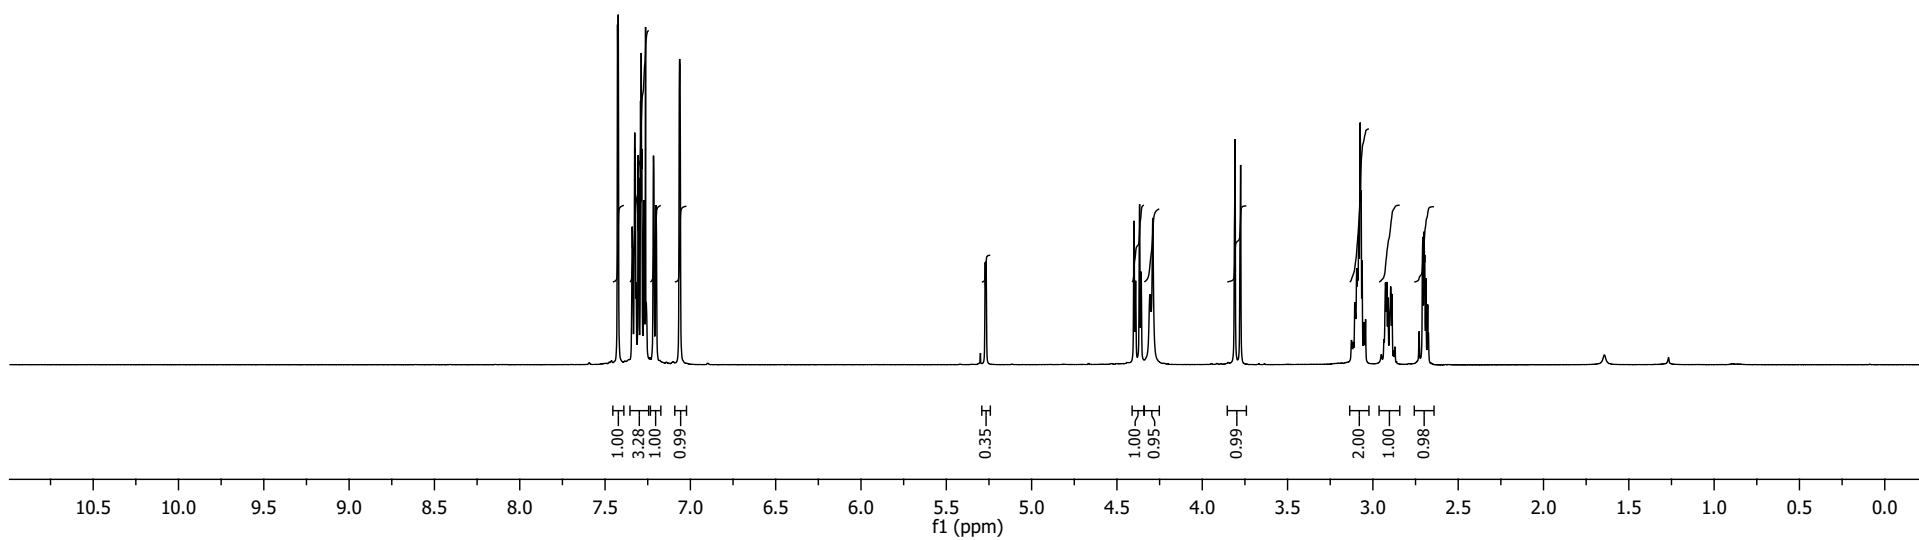

$^1\text{H}$  NMR of **2e-13** in  $\text{CDCl}_3$

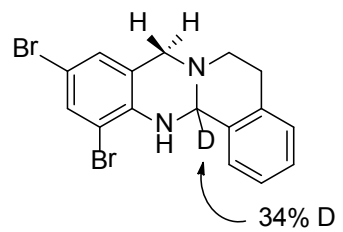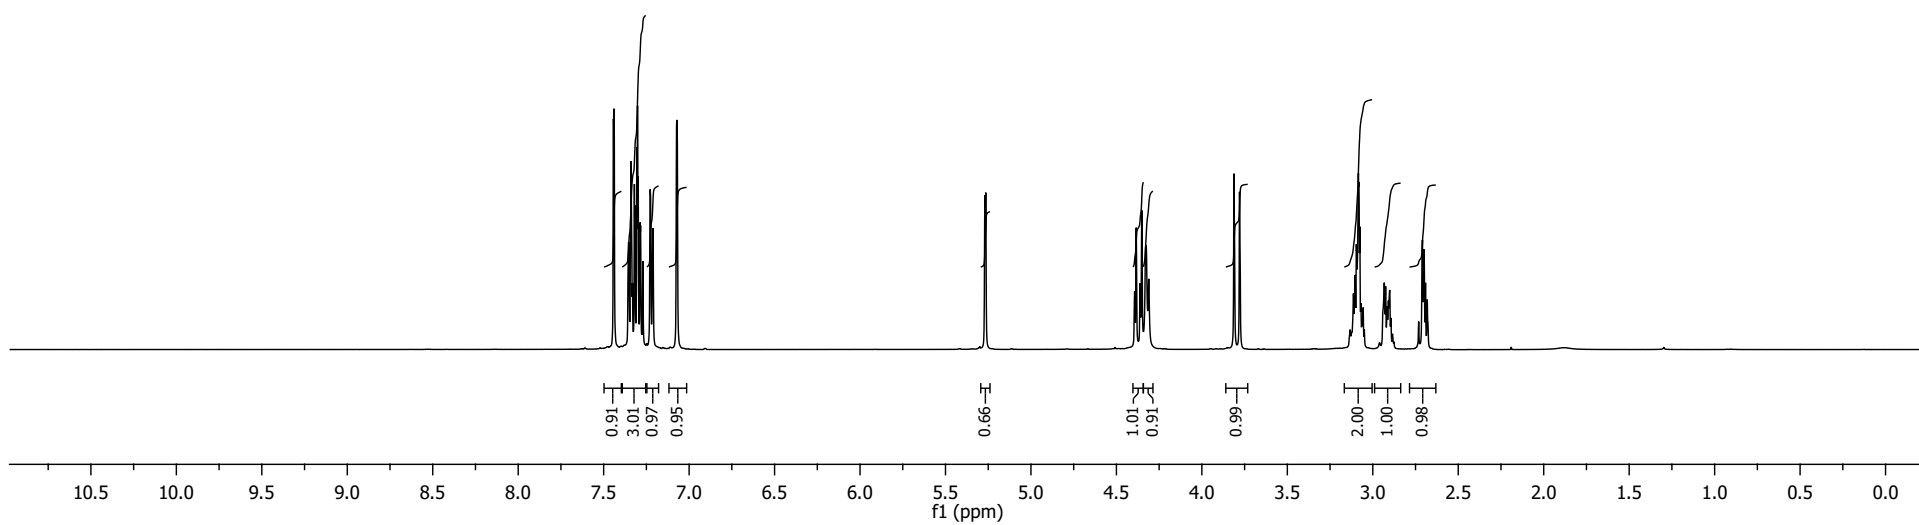

Supplement: NIHMS461320-supplement-2_si_001.pdf [file NIHMS461320-supplement-2_si_001.pdf]
