# Supplementary material
Source: PubMed Central journal article supplement (PMC3654248)
Supplement: NIHMS461320-supplement-1_si_002.pdf [file NIHMS461320-supplement-1_si_002.pdf]

SUPPORTING INFORMATION FOR CALCULATIONS

Metal-free  $\alpha$ -Amination of Secondary Amines:  
Computational and Experimental Evidence for Azaquinone  
Methide and Azomethine Ylide Intermediates

Arne Dieckmann, Matthew T. Richers, Alena Yu. Platonova,  
Chen Zhang, Daniel Seidel\* and K. N. Houk\*

## Contents

|          |                                                                    |           |
|----------|--------------------------------------------------------------------|-----------|
| <b>1</b> | <b>Computational Methods</b>                                       | <b>6</b>  |
| <b>2</b> | <b>Cartesian Coordinates and Energies of Reactants</b>             | <b>7</b>  |
| 2.1      | Aminoaldehyde <b>1a</b> . . . . .                                  | 7         |
| 2.2      | Aminoaldehyde <b>1b</b> . . . . .                                  | 7         |
| 2.3      | Pyrrolidine . . . . .                                              | 8         |
| 2.4      | Piperidine . . . . .                                               | 8         |
| 2.5      | Morpholine . . . . .                                               | 9         |
| 2.6      | Tetrahydroisoquinoline . . . . .                                   | 9         |
| 2.7      | Tetrahydroquinoline . . . . .                                      | 10        |
| <b>3</b> | <b>Cartesian Coordinates and Energies of Products 2</b>            | <b>11</b> |
| 3.1      | Product 2a . . . . .                                               | 11        |
| 3.2      | Product 2b . . . . .                                               | 11        |
| 3.3      | Product 2c . . . . .                                               | 12        |
| 3.4      | Product 2d . . . . .                                               | 13        |
| 3.5      | Product 2e . . . . .                                               | 13        |
| 3.6      | Product 2f . . . . .                                               | 14        |
| 3.7      | Product 2g . . . . .                                               | 15        |
| 3.8      | Product 2h . . . . .                                               | 16        |
| 3.9      | Product 2i . . . . .                                               | 17        |
| <b>4</b> | <b>Cartesian Coordinates and Energies of Hemiaminals 3</b>         | <b>18</b> |
| 4.1      | Hemiaminal 3a . . . . .                                            | 18        |
| 4.2      | Hemiaminal 3b . . . . .                                            | 18        |
| 4.3      | Hemiaminal 3c . . . . .                                            | 19        |
| 4.4      | Hemiaminal 3d . . . . .                                            | 20        |
| 4.5      | Hemiaminal 3e . . . . .                                            | 21        |
| 4.6      | Hemiaminal 3f . . . . .                                            | 22        |
| 4.7      | Hemiaminal 3g . . . . .                                            | 22        |
| 4.8      | Hemiaminal 3h . . . . .                                            | 23        |
| 4.9      | Hemiaminal 3i . . . . .                                            | 24        |
| <b>5</b> | <b>Cartesian Coordinates and Energies of Azaquinone Methides 4</b> | <b>26</b> |
| 5.1      | Azaquinone Methide <i>cis</i> -4a . . . . .                        | 26        |
| 5.2      | Azaquinone Methide <i>trans</i> -4a . . . . .                      | 26        |
| 5.3      | Azaquinone Methide <i>cis</i> -4b . . . . .                        | 27        |
| 5.4      | Azaquinone Methide <i>trans</i> -4b . . . . .                      | 28        |

|          |                                                                     |           |
|----------|---------------------------------------------------------------------|-----------|
| 5.5      | Azaquinone Methide <i>cis</i> -4c                                   | 28        |
| 5.6      | Azaquinone Methide <i>trans</i> -4c                                 | 29        |
| 5.7      | Azaquinone Methide <i>cis</i> -4d                                   | 30        |
| 5.8      | Azaquinone Methide <i>trans</i> -4d                                 | 31        |
| 5.9      | Azaquinone Methide <i>cis</i> -4e                                   | 31        |
| 5.10     | Azaquinone Methide <i>trans</i> -4e                                 | 32        |
| 5.11     | Azaquinone Methide <i>cis</i> -4f                                   | 33        |
| 5.12     | Azaquinone Methide <i>trans</i> -4f                                 | 34        |
| 5.13     | Azaquinone Methide <i>cis</i> -4g                                   | 35        |
| 5.14     | Azaquinone Methide <i>trans</i> -4g                                 | 35        |
| 5.15     | Azaquinone Methide <i>cis</i> -4h                                   | 36        |
| 5.16     | Azaquinone Methide <i>trans</i> -4h                                 | 37        |
| 5.17     | Azaquinone Methide <i>cis</i> -4i                                   | 38        |
| 5.18     | Azaquinone Methide <i>trans</i> -4i                                 | 39        |
| <b>6</b> | <b>Cartesian Coordinates and Energies of Azomethine Ylides 5</b>    | <b>40</b> |
| 6.1      | Azomethine Ylide 5a                                                 | 40        |
| 6.2      | Azomethine Ylide 5b                                                 | 40        |
| 6.3      | Azomethine Ylide 5c                                                 | 41        |
| 6.4      | Azomethine Ylide 5d                                                 | 42        |
| 6.5      | Azomethine Ylide 5e                                                 | 42        |
| 6.6      | Azomethine Ylide 5f                                                 | 43        |
| 6.7      | Azomethine Ylide 5g                                                 | 44        |
| 6.8      | Azomethine Ylide 5h                                                 | 45        |
| 6.9      | Azomethine Ylide 5i                                                 | 46        |
| <b>7</b> | <b>Cartesian Coordinates and Energies of Zwitterions 7</b>          | <b>47</b> |
| 7.1      | Zwitterion 7a                                                       | 47        |
| 7.2      | Zwitterion 7b                                                       | 47        |
| 7.3      | Zwitterion 7c                                                       | 48        |
| 7.4      | Zwitterion 7d                                                       | 49        |
| 7.5      | Zwitterion 7e                                                       | 49        |
| 7.6      | Zwitterion 7f                                                       | 50        |
| 7.7      | Zwitterion 7g                                                       | 51        |
| 7.8      | Zwitterion 7h                                                       | 52        |
| 7.9      | Zwitterion 7i                                                       | 53        |
| <b>8</b> | <b>Cartesian Coordinates and Energies of Transition States TS-3</b> | <b>54</b> |
| 8.1      | Transition State <i>cis</i> -3a                                     | 54        |
| 8.2      | Transition State <i>trans</i> -3a                                   | 54        |
| 8.3      | Transition State <i>cis</i> -3b                                     | 55        |
| 8.4      | Transition State <i>trans</i> -3b                                   | 56        |
| 8.5      | Transition State <i>cis</i> -3c                                     | 57        |
| 8.6      | Transition State <i>trans</i> -3c                                   | 57        |

|           |                                                                     |           |
|-----------|---------------------------------------------------------------------|-----------|
| 8.7       | Transition State <i>cis</i> -3d                                     | 58        |
| 8.8       | Transition State <i>trans</i> -3d                                   | 59        |
| 8.9       | Transition State <i>cis</i> -3e                                     | 60        |
| 8.10      | Transition State <i>trans</i> -3e                                   | 61        |
| 8.11      | Transition State <i>cis</i> -3f                                     | 62        |
| 8.12      | Transition State <i>trans</i> -3f                                   | 62        |
| 8.13      | Transition State <i>cis</i> -3g                                     | 63        |
| 8.14      | Transition State <i>trans</i> -3g                                   | 64        |
| 8.15      | Transition State <i>cis</i> -3h                                     | 65        |
| 8.16      | Transition State <i>trans</i> -3h                                   | 66        |
| 8.17      | Transition State <i>cis</i> -3i                                     | 67        |
| 8.18      | Transition State <i>trans</i> -3i                                   | 68        |
| <b>9</b>  | <b>Cartesian Coordinates and Energies of Transition States TS-5</b> | <b>69</b> |
| 9.1       | Transition State 5a                                                 | 69        |
| 9.2       | Transition State 5b                                                 | 69        |
| 9.3       | Transition State 5c                                                 | 70        |
| 9.4       | Transition State 5d                                                 | 71        |
| 9.5       | Transition State 5e                                                 | 71        |
| 9.6       | Transition State 5f                                                 | 72        |
| 9.7       | Transition State 5g                                                 | 73        |
| 9.8       | Transition State 5h                                                 | 74        |
| 9.9       | Transition State 5i                                                 | 75        |
| <b>10</b> | <b>Cartesian Coordinates and Energies of Transition States TS-6</b> | <b>76</b> |
| 10.1      | Transition State 6a                                                 | 76        |
| 10.2      | Transition State 6b                                                 | 77        |
| 10.3      | Transition State 6c                                                 | 77        |
| 10.4      | Transition State 6d                                                 | 78        |
| 10.5      | Transition State 6e                                                 | 79        |
| 10.6      | Transition State 6f                                                 | 80        |
| 10.7      | Transition State 6g                                                 | 81        |
| 10.8      | Transition State 6h                                                 | 82        |
| 10.9      | Transition State 6i                                                 | 83        |
| <b>11</b> | <b>Cartesian Coordinates and Energies of Transition States TS-7</b> | <b>85</b> |
| 11.1      | Transition State 7a                                                 | 85        |
| 11.2      | Transition State 7b                                                 | 85        |
| 11.3      | Transition State 7c                                                 | 86        |
| 11.4      | Transition State 7d                                                 | 87        |
| 11.5      | Transition State 7e                                                 | 87        |
| 11.6      | Transition State 7f                                                 | 88        |
| 11.7      | Transition State 7g                                                 | 89        |
| 11.8      | Transition State 7h                                                 | 90        |

|                                                                                  |           |
|----------------------------------------------------------------------------------|-----------|
| 11.9 Transition State 7i . . . . .                                               | 91        |
| <b>12 Cartesian Coordinates and Energies of the 1,3-dipolar Cycloaddition</b>    | <b>92</b> |
| 12.1 Transition State TS-8 . . . . .                                             | 92        |
| 12.2 Transition State TS-9 . . . . .                                             | 93        |
| 12.3 Zwitterion 21 . . . . .                                                     | 94        |
| 12.4 Cycloadduct . . . . .                                                       | 95        |
| <b>13 Reaction Enthalpies for the Formation of Iminium Ions in Model Systems</b> | <b>97</b> |
| <b>14 Gaussian 09 Reference</b>                                                  | <b>98</b> |

## 1 Computational Methods

Geometry optimizations were performed with the meta-hybrid density functional M06-2X and a 6-31+G(d,p) basis set. Solvation by ethanol was taken into account by the SMD solvent model, which was applied to both optimizations as well as frequency calculations. It was recently shown that the presence of a polarizable continuum model does not have a great impact on frequencies, while it might be mandatory to locate certain transition states that only exist in polar media. Thermal corrections were calculated from unscaled harmonic vibrational frequencies at the same level of theory for a standard state of 1 mol L<sup>-1</sup> (17.12 mol L<sup>-1</sup> for ethanol) and 298.15 K, as the experimental conditions of refluxing ethanol and high pressure in sealed tubes cannot be reproduced. The resulting free energies refer to Gibbs free energies. Free energies as well as enthalpies are corrected for zero-point vibrational energy. All stationary points were characterized and confirmed by vibrational analysis. An ultrafine grid corresponding to 99 radial shells and 590 angular points was used throughout this study for numerical integration of the density. Natural population analyses used the NBO program (version 3.1) as implemented in GAUSSIAN 09. All calculations were performed with GAUSSIAN 09.

## 2 Cartesian Coordinates and Energies of Reactants

### 2.1 Aminoaldehyde 1a

```
C 1.27886 0.88489 0.00000
C 0.92145 -0.48648 0.00000
Br 2.29477 -1.78335 0.00000
C -0.39176 -0.91020 -0.00000
H -0.61615 -1.97185 -0.00000
C -1.42460 0.03109 0.00000
Br -3.21814 -0.56481 0.00000
C -1.13233 1.37796 0.00000
H -1.92232 2.12418 0.00000
C 0.20025 1.81316 0.00000
C 0.41600 3.25773 0.00000
N 2.56578 1.28543 0.00000
H 3.31918 0.61451 0.00000
H 2.78113 2.27347 0.00000
O 1.51167 3.80907 -0.00000
H -0.50487 3.86585 0.00000
```

```
SCF energy: -5543.213667 hartree
zero-point correction: +0.109165 hartree
enthalpy correction: +0.120198 hartree
free energy correction: +0.071580 hartree
quasiharmonic free energy correction: +0.071580 hartree
```

### 2.2 Aminoaldehyde 1b

```
C -0.06130 0.85729 0.00000
C 1.29772 1.25574 0.00000
C 2.31083 0.31703 0.00000
H 3.34253 0.65827 0.00000
C 2.03457 -1.06356 0.00000
C 0.71493 -1.46851 0.00000
H 0.46382 -2.52722 0.00000
C -0.34442 -0.53766 0.00000
C -1.69803 -1.06272 0.00000
N -1.04120 1.79156 0.00000
H -0.79964 2.77185 0.00000
H -2.01269 1.51538 0.00000
O -2.72873 -0.38861 0.00000
H -1.77191 -2.16511 0.00000
H 2.84119 -1.78844 0.00000
```

H 1.52919 2.31759 -0.00000

```
SCF energy: -400.803264 hartree
zero-point correction: +0.127466 hartree
enthalpy correction: +0.136177 hartree
free energy correction: +0.095339 hartree
quasiharmonic free energy correction: +0.095339 hartree
```

### 2.3 Pyrrolidine

C -0.77490 1.02160 -0.07164  
C 0.77490 1.02160 -0.07164  
C -1.15256 -0.45067 0.20083  
H -1.16073 1.33811 -1.04549  
H -1.19377 1.69281 0.68326  
C 1.15256 -0.45067 0.20083  
H 1.19378 1.69281 0.68325  
H 1.16073 1.33810 -1.04550  
N 0.00000 -1.26404 -0.21405  
H -2.05687 -0.77179 -0.32163  
H -1.30920 -0.60824 1.27457  
H 1.30920 -0.60823 1.27458  
H 2.05687 -0.77179 -0.32163  
H 0.00000 -1.30468 -1.23334

```
SCF energy: -212.501458 hartree
zero-point correction: +0.130838 hartree
enthalpy correction: +0.136672 hartree
free energy correction: +0.102787 hartree
quasiharmonic free energy correction: +0.103029 hartree
```

### 2.4 Piperidine

C -0.71501 1.25838 -0.22812  
C 0.74729 1.20944 0.20484  
C -1.45341 0.00000 0.23565  
H -0.75898 1.32999 -1.32284  
H -1.19013 2.15751 0.17969  
C -0.71501 -1.25838 -0.22812  
C 0.74729 -1.20944 0.20484  
N 1.38443 0.00000 -0.32418  
H 1.28964 -2.08288 -0.16987  
H 0.79260 -1.23752 1.30931  
H 0.79260 1.23752 1.30931  
H 1.28964 2.08287 -0.16987  
H -1.19013 -2.15751 0.17969  
H -0.75898 -1.32999 -1.32284  
H 2.36605 -0.00000 -0.05857  
H -2.48511 0.00000 -0.13305  
H -1.50512 0.00000 1.33370



```
SCF energy: -251.806902 hartree
zero-point correction: +0.160125 hartree
enthalpy correction: +0.166560 hartree
free energy correction: +0.131560 hartree
quasiharmonic free energy correction: +0.131560 hartree
```

## 2.5 Morpholine

```
C 1.17583 -0.75175 0.19829
C 1.19786 0.71365 -0.19891
O 0.00000 -1.39107 -0.29343
H 1.20904 -0.84568 1.29423
H 2.02620 -1.28682 -0.23103
C -1.17582 -0.75175 0.19829
C -1.19787 0.71364 -0.19891
N -0.00000 1.36606 0.33335
H -2.09038 1.19151 0.21548
H -1.24922 0.77972 -1.29908
H 1.24922 0.77972 -1.29908
H 2.09038 1.19151 0.21548
H -2.02619 -1.28683 -0.23103
H -1.20904 -0.84568 1.29423
H -0.00000 2.34594 0.06223
```

```
SCF energy: -287.696860 hartree
zero-point correction: +0.136732 hartree
enthalpy correction: +0.142874 hartree
free energy correction: +0.108381 hartree
quasiharmonic free energy correction: +0.108381 hartree
```

## 2.6 Tetrahydroisoquinoline

```
C 2.35550 0.62228 0.32137
N 2.29250 -0.63312 -0.42873
C 1.16927 1.49086 -0.07625
H 3.29367 1.13169 0.08723
H 2.33354 0.44125 1.41060
C -0.12866 0.71276 -0.03251
H 1.32655 1.86944 -1.09437
H 1.10013 2.36308 0.58293
C -0.11989 -0.68895 0.01222
C 1.18490 -1.45362 0.05723
H 1.10355 -2.35229 -0.56176
H 1.35496 -1.78903 1.09605
C -1.35783 1.38484 -0.04832
C -2.56169 0.68682 -0.01742
C -2.54975 -0.70947 0.03106
C -1.33355 -1.38612 0.04519
H -3.50434 1.22646 -0.02934
H -3.48262 -1.26539 0.05371
H -1.31842 -2.47381 0.07820
H -1.36312 2.47253 -0.08215
```

H 3.15873 -1.14843 -0.29542

```
SCF energy: -404.188831 hartree
zero-point correction: +0.183934 hartree
enthalpy correction: +0.192531 hartree
free energy correction: +0.151735 hartree
quasiharmonic free energy correction: +0.151735 hartree
```

## 2.7 Tetrahydroquinoline

C 2.55080 0.70879 0.02161  
C 2.54460 -0.68730 -0.03381  
C 1.33321 1.38691 0.05259  
C 0.10915 0.71341 0.03477  
C 0.11301 -0.69606 -0.02965  
C 1.34060 -1.38123 -0.06073  
C -1.19729 1.47914 0.09608  
C -2.38106 0.62431 -0.35760  
H -1.11943 2.38518 -0.51437  
H -1.36973 1.81324 1.12778  
C -2.30965 -0.74524 0.30470  
H -2.35860 0.49238 -1.44608  
H -3.32457 1.11456 -0.10088  
N -1.08110 -1.41126 -0.11416  
H -3.15419 -1.37112 0.00577  
H -2.34887 -0.62443 1.39941  
H -1.00094 -2.37337 0.19399  
H 3.48030 -1.23912 -0.05772  
H 1.33385 -2.46787 -0.10983  
H 3.48690 1.25828 0.03880  
H 1.32281 2.47471 0.09444

```
SCF energy: -404.196923 hartree
zero-point correction: +0.183297 hartree
enthalpy correction: +0.192058 hartree
free energy correction: +0.150968 hartree
quasiharmonic free energy correction: +0.150968 hartree
```

## 3 Cartesian Coordinates and Energies of Products 2

### 3.1 Product 2a

```
C 0.57206 0.26659 0.04559
C -0.52538 1.14037 0.00442
Br -0.21022 3.00614 -0.03315
C -1.83741 0.68835 -0.01484
H -2.66079 1.39347 -0.04413
C -2.06585 -0.68037 0.00077
Br -3.84816 -1.31984 -0.01706
C -1.00814 -1.58086 0.03346
H -1.19386 -2.65121 0.04004
C 0.30317 -1.11987 0.05573
C 1.44924 -2.10824 0.10634
N 2.67727 -1.46803 -0.33288
N 1.87985 0.72727 0.01552
C 3.89066 -2.24567 -0.08312
C 2.90078 -0.22989 0.39904
C 4.32080 0.16174 0.00903
C 5.02235 -1.20520 -0.19716
H 4.79776 0.77920 0.77321
H 4.28553 0.73110 -0.92443
H 3.97570 -3.06625 -0.80043
H 3.86498 -2.67970 0.93216
H 5.79653 -1.38796 0.55097
H 5.49489 -1.24891 -1.18091
H 2.02026 1.65951 0.38932
H 2.84655 -0.43008 1.49002
H 1.55335 -2.49337 1.13855
H 1.22899 -2.96288 -0.54090
```

|                                       |                      |
|---------------------------------------|----------------------|
| SCF energy:                           | -5679.332791 hartree |
| zero-point correction:                | +0.217735 hartree    |
| enthalpy correction:                  | +0.231407 hartree    |
| free energy correction:               | +0.176519 hartree    |
| quasiharmonic free energy correction: | +0.177241 hartree    |

### 3.2 Product 2b

```
C 1.04964 -0.69916 -0.03646
C 2.26554 -1.39945 -0.06992
H 2.24614 -2.48605 -0.11085
C 3.47619 -0.71585 -0.05170
H 4.40678 -1.27586 -0.07598
C 3.49649 0.68037 -0.00408
H 4.43886 1.21898 0.00691
C 2.28861 1.37481 0.02608
H 2.28953 2.46261 0.06147
```

C 1.06211 0.70822 0.01435  
C -0.23670 1.48411 0.08440  
N -1.34872 0.64359 -0.33376  
N -0.16822 -1.38959 -0.09945  
C -2.66893 1.18249 -0.01328  
C -1.31842 -0.63659 0.36325  
C -2.67207 -1.25974 0.03453  
C -3.60175 -0.03322 -0.15747  
H -3.00910 -1.93239 0.82653  
H -2.58364 -1.83593 -0.89136  
H -2.92134 2.01158 -0.68006  
H -2.68666 1.56216 1.02449  
H -4.40539 -0.00108 0.58116  
H -4.06148 -0.05230 -1.14835  
H -0.11891 -2.32762 0.28650  
H -1.24477 -0.45195 1.45731  
H -0.39238 1.84747 1.11867  
H -0.18346 2.36645 -0.56215

|                                       |             |                     |
|---------------------------------------|-------------|---------------------|
|                                       | SCF energy: | -536.916765 hartree |
| zero-point correction:                |             | +0.236299 hartree   |
| enthalpy correction:                  |             | +0.247304 hartree   |
| free energy correction:               |             | +0.200639 hartree   |
| quasiharmonic free energy correction: |             | +0.201069 hartree   |

### 3.3 Product 2c

C 0.32686 0.30807 0.14402  
C -0.78738 1.15040 0.01376  
Br -0.51263 3.02084 -0.06591  
C -2.08465 0.66243 -0.05924  
H -2.92279 1.34371 -0.15604  
C -2.27862 -0.71099 -0.00494  
Br -4.03918 -1.40123 -0.09647  
C -1.20166 -1.58142 0.11493  
H -1.36006 -2.65558 0.14881  
C 0.09412 -1.08299 0.18891  
C 1.26646 -2.03149 0.31027  
N 2.49475 -1.36118 -0.08819  
N 1.62262 0.79855 0.18204  
C 3.67885 -2.20182 0.07773  
C 2.63912 -0.12470 0.67740  
C 4.71649 -0.04526 -0.75141  
C 4.86365 -1.57501 -0.67661  
H 3.44941 -3.19646 -0.31491  
H 3.91333 -2.32746 1.15099  
H 5.79391 -1.84026 -0.16252  
H 4.92293 -1.99017 -1.68776  
H 1.71086 1.73999 0.54983  
H 1.33058 -2.40935 1.34856  
H 1.10505 -2.89535 -0.34217  
C 4.04516 0.46899 0.51977  
H 4.10940 0.23370 -1.61902

H 5.69490 0.42728 -0.88042  
H 3.97578 1.56200 0.52623  
H 4.64850 0.18340 1.38857  
H 2.44959 -0.34050 1.74877

SCF energy: -5718.629577 hartree  
zero-point correction: +0.246959 hartree  
enthalpy correction: +0.261527 hartree  
free energy correction: +0.205050 hartree  
quasiharmonic free energy correction: +0.205944 hartree

### 3.4 Product 2d

C 0.30603 0.32615 0.07791  
C -0.82503 1.15256 0.00834  
Br -0.58840 3.02853 -0.04328  
C -2.11476 0.64037 -0.02704  
H -2.96777 1.30799 -0.07940  
C -2.28261 -0.73700 0.00470  
Br -4.03297 -1.45681 -0.03999  
C -1.18673 -1.59023 0.07039  
H -1.32389 -2.66747 0.09389  
C 0.09983 -1.06700 0.10959  
C 1.29568 -1.98016 0.21564  
N 2.50779 -1.32377 -0.26847  
N 1.59079 0.83560 0.05519  
C 3.67179 -2.17795 -0.02140  
C 2.68999 -0.04432 0.40921  
O 5.09510 -0.23930 0.20474  
C 4.94132 -1.48410 -0.47281  
H 3.54248 -3.11326 -0.57482  
H 3.75413 -2.42356 1.05297  
H 5.81737 -2.08780 -0.22678  
H 4.91878 -1.30714 -1.55764  
H 1.69305 1.78506 0.39636  
H 1.41769 -2.29798 1.26783  
H 1.12686 -2.88262 -0.37983  
C 3.98919 0.60442 -0.05525  
H 3.91598 0.81741 -1.13186  
H 4.15728 1.53874 0.48733  
H 2.73704 -0.20450 1.50576

SCF energy: -5754.526331 hartree  
zero-point correction: +0.223442 hartree  
enthalpy correction: +0.237705 hartree  
free energy correction: +0.181704 hartree  
quasiharmonic free energy correction: +0.182635 hartree

### 3.5 Product 2e

C 0.39502 0.14350 0.05860  
C 1.39291 1.12168 -0.06600

Br 0.88356 2.93711 -0.21468  
 C 2.74328 0.80297 -0.08045  
 H 3.49030 1.58387 -0.17232  
 C 3.11042 -0.53182 0.02520  
 Br 4.94864 -0.98509 0.01674  
 C 2.15186 -1.53237 0.13389  
 H 2.44475 -2.57626 0.20194  
 C 0.80150 -1.20197 0.15102  
 C -0.24595 -2.28441 0.26089  
 N -1.54561 -1.80184 -0.19753  
 N -0.95290 0.45824 0.02797  
 H -1.17684 1.40113 0.32214  
 C -2.57828 -2.81582 0.00255  
 C -1.87371 -0.56886 0.50816  
 C -3.84911 -2.38600 -0.70954  
 H -2.77307 -2.97356 1.07964  
 H -2.20933 -3.76012 -0.40736  
 C -3.30888 -0.12811 0.28572  
 H -1.72331 -0.72208 1.59828  
 C -4.24619 -0.98931 -0.29799  
 H -4.66313 -3.08191 -0.48249  
 H -3.68491 -2.42059 -1.79357  
 C -5.56159 -0.54319 -0.47541  
 C -3.71064 1.14243 0.71733  
 C -5.02054 1.57528 0.53683  
 C -5.95057 0.72951 -0.07114  
 H -3.00324 1.80359 1.21378  
 H -5.31561 2.56424 0.87435  
 H -6.28644 -1.21458 -0.93035  
 H -6.97603 1.05704 -0.21524  
 H -0.30242 -2.63919 1.30685  
 H 0.04483 -3.13819 -0.35863

|  |                                       |                      |
|--|---------------------------------------|----------------------|
|  | SCF energy:                           | -5871.016638 hartree |
|  | zero-point correction:                | +0.270460 hartree    |
|  | enthalpy correction:                  | +0.287383 hartree    |
|  | free energy correction:               | +0.225240 hartree    |
|  | quasiharmonic free energy correction: | +0.227264 hartree    |

### 3.6 Product 2f

C 0.37141 0.22643 0.54874  
 C 1.32184 1.14198 0.07215  
 Br 0.82053 2.95394 -0.14563  
 C 2.62158 0.76786 -0.24054  
 H 3.33208 1.50315 -0.60194  
 C 2.98383 -0.56278 -0.08243  
 Br 4.75127 -1.09803 -0.50653  
 C 2.07068 -1.50423 0.37825  
 H 2.35915 -2.54559 0.49262  
 C 0.77368 -1.11981 0.69635  
 C -0.22573 -2.13606 1.22592  
 N -1.61035 -1.68458 1.09919

N -0.93551 0.59017 0.82094  
 H -1.09208 1.57344 1.01036  
 C -1.72226 -0.33684 1.64182  
 C -2.05340 -1.75786 -0.29768  
 C -3.17460 0.10388 1.69075  
 H -1.31733 -0.37181 2.66179  
 C -3.38891 -1.09263 -0.52272  
 H -2.11932 -2.81661 -0.56881  
 H -1.31731 -1.30009 -0.98098  
 C -3.90815 -0.17975 0.40184  
 H -3.22715 1.17196 1.93107  
 H -3.65918 -0.42994 2.51599  
 C -5.12815 0.45112 0.12959  
 C -4.09776 -1.36161 -1.69956  
 C -5.31108 -0.73313 -1.96243  
 C -5.83024 0.18001 -1.04098  
 H -3.68699 -2.07153 -2.41469  
 H -5.85040 -0.95298 -2.87923  
 H -5.52608 1.16367 0.84908  
 H -6.77510 0.67882 -1.23654  
 H -0.01770 -2.33534 2.28321  
 H -0.11089 -3.08238 0.68826

|                                       |                      |
|---------------------------------------|----------------------|
| SCF energy:                           | -5871.021824 hartree |
| zero-point correction:                | +0.270729 hartree    |
| enthalpy correction:                  | +0.287540 hartree    |
| free energy correction:               | +0.225195 hartree    |
| quasiharmonic free energy correction: | +0.227855 hartree    |

### 3.7 Product 2g

C -1.96413 -0.71840 -0.13998  
 C -2.90787 -1.73836 -0.33579  
 C -4.26841 -1.45509 -0.29201  
 H -4.98613 -2.25654 -0.44257  
 C -4.71063 -0.15036 -0.05681  
 C -3.77083 0.86111 0.13163  
 H -4.10045 1.88250 0.31145  
 C -2.40094 0.59577 0.09415  
 C -1.39044 1.69474 0.31810  
 N -0.06043 1.29746 -0.14295  
 N -0.59410 -0.99097 -0.21681  
 H -0.37167 -1.95177 0.01960  
 C 0.92907 2.30464 0.23021  
 C 0.27769 -0.00763 0.42103  
 C 2.24556 2.00805 -0.46544  
 H 1.06961 2.32954 1.32726  
 H 0.54736 3.28340 -0.07391  
 C 1.73652 -0.37392 0.20671  
 H 0.08352 0.01305 1.51606  
 C 2.66838 0.57966 -0.22353  
 H 3.02404 2.68865 -0.10544

```

H 2.13437 2.18410 -1.54248
C 4.00240 0.19525 -0.40804
C 2.16482 -1.67908 0.48192
C 3.49262 -2.05089 0.29544
C 4.41678 -1.10923 -0.16146
H 1.46221 -2.41838 0.85966
H 3.80495 -3.06834 0.51070
H 4.72070 0.93964 -0.74457
H 5.45580 -1.38831 -0.31054
H -1.36535 1.96168 1.39185
H -1.68904 2.59452 -0.22970
H -5.77202 0.07501 -0.02459
H -2.55969 -2.75176 -0.52126

```

```

SCF energy: -728.594924 hartree
zero-point correction: 0.289581 hartree
enthalpy correction: 0.303664 hartree
free energy correction: 0.250027 hartree
quasiharmonic free energy correction: 0.251016 hartree

```

### 3.8 Product 2h

```

C -1.94776 -0.68854 -0.20169
C -2.82746 -1.33466 -1.08475
C -4.07660 -0.78923 -1.36142
H -4.74532 -1.30572 -2.04437
C -4.46949 0.41356 -0.76860
C -3.59184 1.05747 0.10275
H -3.88282 1.99679 0.56966
C -2.33696 0.52460 0.40002
C -1.39979 1.21266 1.37821
N -0.01660 0.73942 1.27259
N -0.67487 -1.20686 0.04667
H -0.59894 -2.20844 -0.09868
C -0.00967 -0.72039 1.25895
C 0.63488 1.30208 0.08536
C 1.41299 -1.24934 1.33435
H -0.56345 -1.04153 2.15273
C 1.99024 0.69224 -0.17611
H 0.74382 2.37993 0.24511
H 0.01271 1.17486 -0.81732
C 2.35024 -0.53626 0.38910
H 1.41578 -2.32635 1.13021
H 1.76771 -1.12307 2.36364
C 3.60421 -1.08460 0.09220
C 2.88637 1.34849 -1.02835
C 4.13031 0.79700 -1.32030
C 4.49233 -0.42843 -0.75493
H 2.59932 2.30302 -1.46466
H 4.81513 1.31895 -1.98233
H 3.88042 -2.03984 0.53383
H 5.46055 -0.86869 -0.97508

```



H -1.74587 1.04154 2.40454  
H -1.41144 2.29512 1.21326  
H -5.44241 0.84357 -0.98523  
H -2.51687 -2.26778 -1.54899

SCF energy: -728.598803 hartree  
zero-point correction: 0.289710 hartree  
enthalpy correction: 0.303672 hartree  
free energy correction: 0.250164 hartree  
quasiharmonic free energy correction: 0.251364 hartree

### 3.9 Product 2i

C 0.14660 0.60488 -0.55868  
C 1.21482 1.24915 0.08430  
Br 0.97149 3.01394 0.72032  
C 2.44705 0.63846 0.27138  
H 3.25066 1.16927 0.76952  
C 2.62081 -0.66051 -0.18536  
Br 4.29169 -1.51420 0.07033  
C 1.58600 -1.34064 -0.81731  
H 1.72434 -2.36113 -1.16394  
C 0.35905 -0.71802 -1.00625  
C -0.78044 -1.43229 -1.70721  
N -2.07837 -0.85472 -1.37764  
N -1.09406 1.19491 -0.69863  
C -2.05479 0.59248 -1.62959  
C -4.47702 0.25257 -0.93057  
C -2.63273 -1.17397 -0.11390  
C -3.89253 -0.60280 0.15664  
C -4.51940 -0.86690 1.36953  
C -2.02812 -2.00659 0.83255  
C -2.68333 -2.27661 2.03763  
C -3.92353 -1.70812 2.31474  
H -1.05220 -2.44484 0.65071  
H -2.20676 -2.92818 2.76454  
H -5.48949 -0.41829 1.57143  
H -4.42443 -1.91328 3.25599  
C -3.43236 1.25244 -1.44626  
H -5.36841 0.77782 -0.57780  
H -4.78354 -0.39513 -1.76227  
H -3.33392 2.07424 -0.72956  
H -3.76445 1.68216 -2.39440  
H -0.64949 -1.35469 -2.79208  
H -0.77811 -2.49719 -1.46319  
H -1.12342 2.20558 -0.63595  
H -1.70534 0.71045 -2.66203

SCF energy: -5871.022425 hartree  
zero-point correction: +0.270676 hartree  
enthalpy correction: +0.287504 hartree  
free energy correction: +0.225393 hartree  
quasiharmonic free energy correction: +0.227765 hartree

## 4 Cartesian Coordinates and Energies of Hemiaminals 3

### 4.1 Hemiaminal 3a

```
C 1.04102 -1.29030 0.07044
C 1.99910 -0.26423 0.02493
Br 3.84059 -0.71073 0.06142
C 1.65928 1.08122 -0.03421
H 2.43312 1.84023 -0.06912
C 0.31699 1.42169 -0.04542
Br -0.18636 3.24499 -0.11210
C -0.66584 0.43972 -0.00079
H -1.70764 0.73244 0.00753
C -0.32298 -0.90536 0.04473
C -1.39175 -1.99250 0.18305
N -2.76803 -1.58653 0.18093
N 1.39586 -2.61745 0.20780
H 2.36195 -2.84336 0.00937
H 0.74016 -3.27635 -0.19688
C -3.27673 -0.87083 1.36638
C -3.36237 -1.05648 -1.05341
C -4.67895 -0.46252 -0.55415
H -3.51570 -1.85993 -1.77945
H -2.74345 -0.28712 -1.53988
C -4.28826 0.13800 0.80116
H -5.41566 -1.26194 -0.41657
H -5.09504 0.27274 -1.24707
H -2.47377 -0.37117 1.92328
H -3.75951 -1.57926 2.05155
H -5.13976 0.28848 1.46915
H -3.80821 1.11151 0.64798
O -1.17133 -2.91364 -0.87854
H -1.20782 -2.49342 1.14771
H -1.76815 -3.66528 -0.74302
```

```
SCF energy: -5755.732602 hartree
zero-point correction: +0.243861 hartree
enthalpy correction: +0.259923 hartree
free energy correction: +0.200301 hartree
quasiharmonic free energy correction: +0.201438 hartree
```

### 4.2 Hemiaminal 3b

```
C -2.22791 0.69707 -0.06033
C -3.41621 -0.05072 -0.01912
H -4.36457 0.47937 0.02916
C -3.38980 -1.44007 -0.04959
H -4.32404 -1.99387 -0.01634
C -2.17167 -2.11530 -0.12761
```

H -2.13992 -3.19969 -0.16348  
C -0.98897 -1.37771 -0.16702  
H -0.04021 -1.89611 -0.25809  
C -0.98880 0.01783 -0.11732  
C 0.29236 0.82678 -0.23177  
N 1.48234 0.01727 -0.29927  
N -2.29259 2.08728 -0.13344  
H -3.19611 2.47208 0.11584  
H -1.52760 2.56698 0.32649  
C 2.65930 0.70790 -0.84185  
C 1.96366 -0.55791 0.96328  
C 3.29123 -1.19668 0.55037  
H 1.24730 -1.26728 1.38469  
H 2.13802 0.23211 1.71076  
C 3.81381 -0.27455 -0.58141  
H 3.11582 -2.20683 0.16871  
H 3.98482 -1.27093 1.39139  
H 2.84681 1.65602 -0.30855  
H 2.51147 0.93729 -1.90081  
H 4.04091 -0.85352 -1.48013  
H 4.72267 0.25887 -0.29298  
O 0.30336 1.76034 0.86289  
H 0.24691 1.40343 -1.16770  
H 0.96054 2.44768 0.68112

|  |                                       |                     |
|--|---------------------------------------|---------------------|
|  | SCF energy:                           | -613.319781 hartree |
|  | zero-point correction:                | +0.262555 hartree   |
|  | enthalpy correction:                  | +0.276137 hartree   |
|  | free energy correction:               | +0.223679 hartree   |
|  | quasiharmonic free energy correction: | +0.224529 hartree   |

### 4.3 Hemiaminal 3c

C 1.10271 -1.33628 0.02954  
C 2.21839 -0.48383 0.03368  
Br 3.95615 -1.23374 0.12310  
C 2.10690 0.89994 -0.01294  
H 2.99562 1.52128 -0.00860  
C 0.84057 1.45881 -0.06252  
Br 0.65429 3.34151 -0.12569  
C -0.29347 0.65385 -0.06183  
H -1.27326 1.11295 -0.07030  
C -0.17698 -0.72959 -0.02482  
C -1.40769 -1.62671 0.08580  
N -2.70334 -1.01186 0.12624  
N 1.22539 -2.70599 0.14774  
H 2.14585 -3.08627 -0.03062  
H 0.48136 -3.23850 -0.28950  
C -3.09916 -0.42879 1.40951  
C -3.21096 -0.30053 -1.04584  
C -4.73088 -0.51192 -1.12301  
H -2.71479 -0.69197 -1.93706  
H -2.99948 0.77857 -1.00571

C -4.47387 0.24107 1.27125  
H -2.36549 0.30369 1.78519  
H -3.14908 -1.24075 2.14726  
O -1.33874 -2.54225 -1.00247  
H -1.30553 -2.17918 1.03521  
H -2.07327 -3.16705 -0.90286  
C -5.34926 -0.54201 0.29189  
H -4.35453 1.26940 0.90881  
H -4.94047 0.30633 2.25877  
H -6.36480 -0.13407 0.27383  
H -5.43170 -1.57723 0.64390  
H -4.94884 -1.45008 -1.64502  
H -5.16941 0.29944 -1.71515

|                                       |                      |
|---------------------------------------|----------------------|
| SCF energy:                           | -5795.028622 hartree |
| zero-point correction:                | +0.272896 hartree    |
| enthalpy correction:                  | +0.290128 hartree    |
| free energy correction:               | +0.227480 hartree    |
| quasiharmonic free energy correction: | +0.229461 hartree    |

#### 4.4 Hemiaminal 3d

C 1.11648 -1.33246 0.04849  
C 2.21764 -0.46099 0.03357  
Br 3.96906 -1.18062 0.10223  
C 2.08240 0.92030 -0.01921  
H 2.96072 1.55620 -0.02838  
C 0.80645 1.45791 -0.05674  
Br 0.58758 3.33689 -0.12484  
C -0.31352 0.63386 -0.04176  
H -1.30017 1.07794 -0.04231  
C -0.17363 -0.74741 0.00085  
C -1.38954 -1.66316 0.11932  
N -2.69391 -1.06257 0.13810  
N 1.26542 -2.69806 0.17855  
H 2.19170 -3.06307 -0.00132  
H 0.52791 -3.25008 -0.24492  
C -3.12149 -0.46165 1.40002  
C -3.20880 -0.38812 -1.04612  
C -4.73066 -0.56317 -1.04703  
H -2.78902 -0.85334 -1.94072  
H -2.95963 0.68175 -1.08445  
C -4.46215 0.23954 1.16632  
H -2.40521 0.27355 1.80156  
H -3.23269 -1.25843 2.14563  
O -1.30445 -2.59263 -0.95309  
H -1.29050 -2.19750 1.07915  
H -2.01690 -3.23983 -0.83694  
O -5.26771 -0.52487 0.28128  
H -4.31344 1.24875 0.75888  
H -5.01224 0.33272 2.10479  
H -5.00399 -1.54178 -1.45179  
H -5.20113 0.22016 -1.65624

```
SCF energy: -5830.917033 hartree
zero-point correction: +0.249552 hartree
enthalpy correction: +0.266502 hartree
free energy correction: +0.204253 hartree
quasiharmonic free energy correction: +0.206225 hartree
```

#### 4.5 Hemiaminal 3e

```
C -1.02752 1.11560 0.80970
C -2.13851 1.16442 -0.05531
Br -2.76767 2.85141 -0.64291
C -2.80781 0.03468 -0.50213
H -3.66052 0.12949 -1.16539
C -2.36023 -1.20745 -0.08095
Br -3.23965 -2.77102 -0.68109
C -1.26431 -1.30911 0.76464
H -0.92373 -2.28464 1.10046
C -0.58580 -0.17355 1.20175
C 0.65326 -0.44012 2.05363
N 1.90132 -0.58034 1.31182
N -0.38206 2.26835 1.19768
H -0.91043 3.12793 1.13133
H 0.18774 2.18907 2.03104
C 2.20649 0.55262 0.43873
C 1.99097 -1.83089 0.55542
C 4.12405 -0.88926 -0.38343
C 3.53906 0.37649 -0.25304
C 4.18079 1.49496 -0.79814
C 5.34860 -1.00846 -1.05279
C 5.98511 0.10634 -1.59061
C 5.39633 1.36719 -1.46370
H 5.80228 -1.99253 -1.15194
H 6.93390 -0.00542 -2.10752
H 3.71876 2.47455 -0.69355
H 5.88400 2.24431 -1.87907
O 0.78166 0.57926 3.02464
H 0.49764 -1.40437 2.55139
H 1.58753 0.40194 3.53275
H 2.22556 1.46816 1.03563
H 1.42294 0.67883 -0.33121
C 3.44835 -2.10565 0.20695
H 1.59343 -2.64699 1.16595
H 1.38478 -1.77713 -0.36666
H 3.50871 -2.94314 -0.49648
H 3.98281 -2.41042 1.11534
```

```
SCF energy: -5947.423272 hartree
zero-point correction: +0.295781 hartree
enthalpy correction: +0.315279 hartree
free energy correction: +0.247182 hartree
quasiharmonic free energy correction: +0.250574 hartree
```

#### 4.6 Hemiaminal 3f

C 1.44195 -1.22360 0.56733  
C 2.50646 -0.74056 -0.21973  
Br 3.66662 -1.98311 -1.05580  
C 2.75446 0.60917 -0.42115  
H 3.59009 0.92516 -1.03555  
C 1.91559 1.53323 0.18124  
Br 2.21650 3.38291 -0.07804  
C 0.84927 1.10637 0.96052  
H 0.20227 1.83445 1.44162  
C 0.58987 -0.24998 1.14810  
C -0.66787 -0.56746 1.95408  
N -1.89255 -0.70182 1.17314  
N 1.23023 -2.57755 0.71249  
H 2.02740 -3.17723 0.54669  
H 0.67314 -2.84379 1.51546  
C -1.83207 -1.67080 0.07621  
C -2.38048 0.58310 0.67984  
C -3.25020 -2.02761 -0.35195  
H -1.31544 -2.56815 0.41885  
H -1.26665 -1.25808 -0.77893  
C -3.69774 0.43867 -0.04756  
H -1.65379 1.04643 -0.01335  
H -2.50036 1.26671 1.52748  
C -4.10526 -0.79914 -0.56008  
H -3.70824 -2.65799 0.42079  
H -3.22070 -2.62122 -1.27191  
C -5.32143 -0.88257 -1.24994  
C -4.50188 1.56784 -0.23949  
C -5.70819 1.47605 -0.92747  
C -6.12099 0.24161 -1.43560  
H -4.17550 2.52563 0.16063  
H -6.32418 2.35977 -1.06608  
H -5.63831 -1.84498 -1.64661  
H -7.06048 0.15786 -1.97434  
O -0.45288 -1.73822 2.71557  
H -0.83942 0.28282 2.62541  
H -1.26856 -1.92509 3.20409

|                           |             |                      |
|---------------------------|-------------|----------------------|
|                           | SCF energy: | -5947.422568 hartree |
| zero-point                | correction: | +0.296212 hartree    |
| enthalpy                  | correction: | +0.315704 hartree    |
| free energy               | correction: | +0.247228 hartree    |
| quasiharmonic free energy | correction: | +0.251004 hartree    |

#### 4.7 Hemiaminal 3g

C -2.62460 1.02671 -0.01815  
C -3.53160 1.19399 -1.08218  
H -3.83795 2.20409 -1.34394  
C -4.03173 0.10834 -1.78842

```

H -4.73124 0.27708 -2.60245
C -3.64619 -1.18888 -1.44607
H -4.03866 -2.04734 -1.98148
C -2.75383 -1.36172 -0.39172
H -2.45690 -2.36856 -0.10424
C -2.22164 -0.28451 0.32681
C -1.20688 -0.62953 1.41035
N 0.19292 -0.66607 0.98640
N -2.12529 2.16077 0.61315
H -2.70320 2.98548 0.50575
H -1.80197 2.02009 1.56219
C 0.65046 0.56665 0.34731
C 0.50035 -1.81287 0.13054
C 2.75526 -0.74869 -0.17817
C 2.11105 0.48693 -0.03617
C 2.81887 1.66839 -0.28789
C 4.10141 -0.77557 -0.56441
C 4.80183 0.40151 -0.81189
C 4.15554 1.63272 -0.67381
H 4.60006 -1.73657 -0.67392
H 5.84501 0.36145 -1.11200
H 2.31079 2.62412 -0.17602
H 4.69231 2.55783 -0.86308
O -1.35069 0.27095 2.49387
H -1.42958 -1.64832 1.75057
H -0.70021 0.02393 3.16791
H 0.49952 1.40273 1.03526
H 0.05832 0.78170 -0.56125
C 2.00741 -2.03279 0.09854
H 0.00202 -2.70024 0.53189
H 0.12073 -1.65330 -0.89479
H 2.25754 -2.78071 -0.66163
H 2.33125 -2.43813 1.06538

```

```

SCF energy: -805.007307 hartree
zero-point correction: +0.315643 hartree
enthalpy correction: +0.332288 hartree
free energy correction: +0.272859 hartree
quasiharmonic free energy correction: +0.274725 hartree

```

## 4.8 Hemiaminal 3h

```

C 2.97737 -0.48454 -0.45185
C 3.84819 0.26430 -1.26660
H 4.46612 -0.26790 -1.98615
C 3.93291 1.64634 -1.16435
H 4.61868 2.18843 -1.80957
C 3.15396 2.32896 -0.22900
H 3.22074 3.40721 -0.12645
C 2.29429 1.59441 0.58313
H 1.69555 2.11164 1.33042
C 2.17227 0.20283 0.48667

```

C 1.13774 -0.44965 1.39653  
 N -0.20829 -0.58962 0.84195  
 N 2.91755 -1.86228 -0.63819  
 H 3.73837 -2.25494 -1.08316  
 H 2.61235 -2.39252 0.16875  
 C -0.27571 -1.27964 -0.44757  
 C -0.90485 0.69093 0.75970  
 C -1.71013 -1.72481 -0.70595  
 H 0.38155 -2.14963 -0.41943  
 H 0.07260 -0.61981 -1.26276  
 C -2.32278 0.52597 0.26195  
 H -0.37928 1.38746 0.07994  
 H -0.91287 1.15518 1.75205  
 C -2.70319 -0.61238 -0.46000  
 H -1.94669 -2.56970 -0.04655  
 H -1.80544 -2.08827 -1.73488  
 C -4.01818 -0.71100 -0.93209  
 C -3.25597 1.54304 0.49420  
 C -4.56014 1.43748 0.01970  
 C -4.94404 0.30179 -0.69799  
 H -2.95196 2.42418 1.05565  
 H -5.27429 2.23338 0.20978  
 H -4.31190 -1.59601 -1.49289  
 H -5.95917 0.20898 -1.07323  
 O 1.61090 -1.71843 1.81033  
 H 1.02051 0.20166 2.27235  
 H 0.93253 -2.11286 2.37827

SCF energy: -805.006897 hartree  
 zero-point correction: +0.315643 hartree  
 enthalpy correction: +0.332323 hartree  
 free energy correction: +0.272818 hartree  
 quasiharmonic free energy correction: +0.274601 hartree

#### 4.9 Hemiaminal 3i

C -1.16847 -1.13111 -0.53337  
 C -2.49915 -0.86701 -0.14863  
 Br -3.69781 -2.31943 0.04963  
 C -2.98108 0.40834 0.10128  
 H -4.01500 0.55612 0.39370  
 C -2.11116 1.48090 -0.02848  
 Br -2.73094 3.23515 0.31622  
 C -0.79423 1.27444 -0.41075  
 H -0.11780 2.11747 -0.51902  
 C -0.31346 -0.00921 -0.65821  
 C 1.15004 -0.08994 -1.06794  
 N 2.04034 -0.17397 0.06695  
 N -0.71906 -2.42211 -0.69171  
 H -1.41994 -3.13287 -0.85252  
 H 0.12024 -2.52989 -1.24804  
 C 1.72228 -1.17133 1.09258  
 C 4.36449 -0.24327 0.83889



C 3.40974 0.09141 -0.15196  
C 3.86589 0.71822 -1.32966  
C 5.70712 0.07586 0.62795  
C 6.15008 0.70446 -0.53307  
C 5.21294 1.01865 -1.51373  
H 6.42075 -0.18291 1.40774  
H 7.20135 0.93736 -0.67008  
H 3.18229 0.97989 -2.12941  
H 5.52209 1.50131 -2.43653  
O 1.31503 -1.16117 -1.99793  
H 1.36574 0.84827 -1.58219  
H 2.21408 -1.13101 -2.35757  
C 3.97157 -0.95119 2.11781  
C 2.47421 -0.85625 2.37500  
H 4.25851 -2.00824 2.04075  
H 4.54123 -0.53329 2.95418  
H 2.20247 0.15305 2.70576  
H 2.17209 -1.55743 3.15832  
H 1.97703 -2.18569 0.74613  
H 0.64723 -1.13860 1.27455

SCF energy: -5947.424750 hartree  
zero-point correction: +0.296110 hartree  
enthalpy correction: +0.315787 hartree  
free energy correction: +0.247079 hartree  
quasiharmonic free energy correction: +0.250602 hartree

## 5 Cartesian Coordinates and Energies of Azaquinone Methides 4

### 5.1 Azaquinone Methide *cis-4a*

```
C -0.38353 0.80980 -0.55338
C 0.94530 1.21328 -0.09233
C 1.96761 0.34156 0.12808
H 2.94757 0.70623 0.41930
C 1.75191 -1.05125 -0.03837
C 0.50927 -1.52412 -0.34348
H 0.32961 -2.59262 -0.42999
C -0.59110 -0.63525 -0.49587
C -1.84688 -1.27893 -0.64372
N -3.04128 -0.85530 -0.31287
H -1.82835 -2.30194 -1.02009
N -1.28962 1.60955 -1.04509
H -0.96106 2.57455 -1.00947
C -4.24947 -1.67618 -0.53951
C -3.34651 0.30177 0.54455
C -4.83931 0.15783 0.85636
H -3.08135 1.22653 0.02592
H -2.71297 0.22304 1.43662
C -5.12305 -1.33540 0.66000
H -5.42498 0.74512 0.14199
H -5.07457 0.51062 1.86235
H -3.96811 -2.72761 -0.62057
H -4.71974 -1.35658 -1.47590
H -6.17680 -1.55214 0.47444
H -4.79297 -1.90744 1.53357
Br 1.27169 3.06574 0.12621
Br 3.21444 -2.23049 0.19589
```

|                                       |                      |
|---------------------------------------|----------------------|
| SCF energy:                           | -5679.288336 hartree |
| zero-point correction:                | +0.215101 hartree    |
| enthalpy correction:                  | +0.229763 hartree    |
| free energy correction:               | +0.171725 hartree    |
| quasiharmonic free energy correction: | +0.173892 hartree    |

### 5.2 Azaquinone Methide *trans-4a*

```
C 0.54734 -1.48323 0.00767
C 1.81840 -0.75821 0.01057
C 1.92044 0.59752 0.00443
H 2.89524 1.07451 0.02583
C 0.74566 1.39339 -0.02919
C -0.48782 0.81369 -0.07756
H -1.35938 1.44971 -0.13821
C -0.62899 -0.60239 -0.08349
C -1.85764 -1.27951 -0.25423
```

N -3.09586 -0.84940 -0.22564  
H -1.76613 -2.34899 -0.43253  
N 0.41904 -2.77753 0.09298  
H 1.33408 -3.22414 0.10583  
C -4.23797 -1.76301 -0.44150  
C -3.57637 0.49944 0.13142  
C -5.10196 0.35232 0.21382  
H -3.28066 1.22140 -0.63294  
H -3.12640 0.78349 1.08878  
C -5.32598 -1.14823 0.42721  
H -5.55446 0.66407 -0.73225  
H -5.51937 0.96798 1.01241  
H -3.95007 -2.77913 -0.16925  
H -4.51706 -1.73532 -1.50108  
H -6.32368 -1.47631 0.12960  
H -5.16201 -1.41959 1.47535  
Br 3.41444 -1.77785 0.05411  
Br 0.93348 3.27729 -0.01862

|                                       |             |                      |
|---------------------------------------|-------------|----------------------|
|                                       | SCF energy: | -5679.290708 hartree |
| zero-point correction:                |             | +0.215849 hartree    |
| enthalpy correction:                  |             | +0.230523 hartree    |
| free energy correction:               |             | +0.171923 hartree    |
| quasiharmonic free energy correction: |             | +0.174541 hartree    |

### 5.3 Azaquinone Methide *cis*-4b

C 1.43779 0.89345 -0.33507  
C 2.77105 1.15566 0.19468  
H 3.07967 2.19667 0.26721  
C 3.63659 0.15211 0.51132  
H 4.63818 0.39989 0.85545  
C 3.26188 -1.22356 0.38167  
H 3.97621 -2.01037 0.59895  
C 1.97927 -1.51754 0.01236  
H 1.65651 -2.55543 -0.04954  
C 1.00063 -0.50041 -0.24130  
C -0.31078 -0.97471 -0.44430  
N -1.46747 -0.36739 -0.27406  
H -0.41047 -2.02388 -0.72654  
N 0.71242 1.80873 -0.93085  
H 1.21822 2.69668 -0.90758  
C -2.74685 -1.04515 -0.56455  
C -1.68801 0.88265 0.46837  
C -3.21128 0.98946 0.57742  
H -1.20952 1.71626 -0.05297  
H -1.20204 0.77621 1.44701  
C -3.69229 -0.46202 0.47795  
H -3.60401 1.57070 -0.26351  
H -3.51556 1.48134 1.50347  
H -2.61007 -2.12677 -0.50418  
H -3.06707 -0.78305 -1.57939  
H -4.73905 -0.55018 0.17982

H -3.55367 -0.97707 1.43480

```
SCF energy: -536.870958 hartree
zero-point correction: +0.234051 hartree
enthalpy correction: +0.246059 hartree
free energy correction: +0.196665 hartree
quasiharmonic free energy correction: +0.197697 hartree
```

#### 5.4 Azaquinone Methide *trans*-4b

C 2.10030 1.00535 0.12667  
C 3.40294 0.36006 0.02653  
H 4.28137 0.99945 0.08511  
C 3.53660 -0.98885 -0.09998  
H 4.53213 -1.42436 -0.14680  
C 2.39513 -1.84929 -0.18354  
H 2.52676 -2.91964 -0.30012  
C 1.14450 -1.29812 -0.15365  
H 0.28852 -1.95103 -0.27637  
C 0.94139 0.11473 -0.03097  
C -0.30393 0.75304 -0.15994  
N -1.52858 0.26975 -0.11921  
H -0.26247 1.82996 -0.32059  
N 1.95033 2.28585 0.36427  
H 2.86942 2.72906 0.39289  
C -2.70266 1.14120 -0.36327  
C -1.94437 -1.08203 0.28813  
C -3.42205 -0.90665 0.63342  
H -1.33112 -1.41697 1.12868  
H -1.81856 -1.77862 -0.54847  
C -3.87631 0.16703 -0.35911  
H -3.52438 -0.53995 1.66022  
H -3.97323 -1.84442 0.54071  
H -2.57743 1.67700 -1.30587  
H -2.77882 1.86652 0.45437  
H -4.80870 0.65569 -0.07047  
H -4.00495 -0.27072 -1.35455

```
SCF energy: -536.873989 hartree
zero-point correction: +0.234210 hartree
enthalpy correction: +0.246323 hartree
free energy correction: +0.196467 hartree
quasiharmonic free energy correction: +0.197702 hartree
```

#### 5.5 Azaquinone Methide *cis*-4c

C -0.20479 0.75003 -0.26406  
C 1.16799 1.21571 -0.06352  
C 2.24825 0.39354 0.05121  
C 2.06973 -1.01080 -0.00366  
C 0.81662 -1.53867 -0.12216  
H 0.67482 -2.61566 -0.15340

C -0.33221 -0.70329 -0.16530  
 C -1.55819 -1.42602 -0.22602  
 N -2.77049 -1.11238 0.15644  
 N -1.22466 1.50546 -0.56608  
 H -0.93234 2.48059 -0.61935  
 C -3.89218 -2.02658 -0.12344  
 C -3.13374 -0.00438 1.05103  
 C -4.28908 0.80353 0.46949  
 C -5.04429 -1.25383 -0.75884  
 H -4.21156 -2.46059 0.83260  
 H -3.53360 -2.82520 -0.77391  
 H 3.24453 0.80844 0.16766  
 Br 1.46120 3.08737 -0.02426  
 Br 3.59526 -2.12959 0.08333  
 H -5.87070 -1.95006 -0.93297  
 H -4.72147 -0.87022 -1.73468  
 H -3.93535 1.31132 -0.43411  
 H -4.57101 1.57236 1.19617  
 H -1.48339 -2.43519 -0.63117  
 H -2.25872 0.60935 1.23705  
 H -3.44508 -0.48168 1.99019  
 C -5.48065 -0.09811 0.14268  
 H -6.27271 0.48125 -0.34188  
 H -5.89822 -0.50543 1.07330

|                                       |                      |
|---------------------------------------|----------------------|
| SCF energy:                           | -5718.588530 hartree |
| zero-point correction:                | +0.244699 hartree    |
| enthalpy correction:                  | +0.260225 hartree    |
| free energy correction:               | +0.200716 hartree    |
| quasiharmonic free energy correction: | +0.202779 hartree    |

## 5.6 Azaquinone Methide *trans*-4c

C 0.88620 -1.48656 0.14039  
 C 2.08164 -0.66325 0.00668  
 C 2.06362 0.69905 -0.03461  
 C 0.82801 1.38993 0.01263  
 C -0.35203 0.70148 0.07662  
 H -1.28702 1.24642 0.02088  
 C -0.35461 -0.71450 0.11864  
 C -1.53498 -1.49615 -0.00774  
 N -2.76786 -1.22896 0.34132  
 N 0.85564 -2.78462 0.29623  
 H 1.79561 -3.17000 0.21653  
 C -3.88103 -2.06949 -0.12938  
 C -3.22186 -0.07456 1.12806  
 C -4.10122 0.82627 0.26202  
 C -4.79230 -1.23195 -1.02671  
 H -4.42750 -2.41907 0.75401  
 H -3.46801 -2.92977 -0.65796  
 H 2.99181 1.25670 -0.11094  
 Br 3.75573 -1.54653 -0.08787  
 Br 0.84278 3.28212 -0.07858

H -5.63768 -1.85244 -1.33979  
H -4.23438 -0.95125 -1.92874  
H -3.50474 1.24073 -0.56043  
H -4.45446 1.66347 0.87174  
H -1.39788 -2.47853 -0.45809  
H -2.36314 0.43597 1.55976  
H -3.81891 -0.48653 1.95081  
C -5.27928 0.02327 -0.29813  
H -5.87237 0.64525 -0.97560  
H -5.93674 -0.27275 0.52994

SCF energy: -5718.592638 hartree  
zero-point correction: +0.245400 hartree  
enthalpy correction: +0.260767 hartree  
free energy correction: +0.201722 hartree  
quasiharmonic free energy correction: +0.203485 hartree

## 5.7 Azaquinone Methide *cis*-4d

C -0.21469 0.74253 -0.25124  
C 1.15790 1.21553 -0.05778  
C 2.24073 0.39819 0.05134  
C 2.06797 -1.00904 -0.00197  
C 0.81877 -1.54322 -0.11035  
H 0.68138 -2.62071 -0.13980  
C -0.33676 -0.71233 -0.14684  
C -1.55536 -1.43792 -0.19932  
N -2.77417 -1.11306 0.16348  
N -1.23657 1.49369 -0.55268  
H -0.94757 2.46938 -0.61440  
C -3.90409 -2.00801 -0.12370  
C -3.15955 -0.00079 1.03622  
C -4.33360 0.74356 0.41921  
C -5.04135 -1.18546 -0.71295  
H -4.22703 -2.47016 0.81631  
H -3.58748 -2.78064 -0.82551  
H 3.23619 0.81653 0.16220  
Br 1.44195 3.08792 -0.02012  
Br 3.60043 -2.11798 0.07315  
O -5.42079 -0.14307 0.17404  
H -5.91851 -1.81896 -0.85925  
H -4.73631 -0.75992 -1.67974  
H -4.02045 1.21982 -0.51884  
H -4.69604 1.50608 1.11143  
H -1.47931 -2.45693 -0.57892  
H -2.31733 0.66272 1.19986  
H -3.46928 -0.45286 1.98667

SCF energy: -5754.475320 hartree  
zero-point correction: +0.221157 hartree  
enthalpy correction: +0.236423 hartree  
free energy correction: +0.176907 hartree  
quasiharmonic free energy correction: +0.179447 hartree

## 5.8 Azaquinone Methide *trans*-4d

C 0.88425 -1.48819 0.12962  
C 2.08055 -0.66173 0.00983  
C 2.05948 0.69969 -0.02414  
C 0.82056 1.38881 0.01075  
C -0.35796 0.69954 0.06156  
H -1.29275 1.24313 -0.00920  
C -0.35876 -0.71836 0.10237  
C -1.53500 -1.49826 -0.03091  
N -2.77026 -1.22863 0.31896  
N 0.85497 -2.78563 0.27932  
H 1.79593 -3.16985 0.20466  
C -3.89436 -2.03666 -0.17162  
C -3.23519 -0.09070 1.11780  
C -4.15987 0.76367 0.25900  
C -4.80679 -1.12741 -0.98842  
H -4.43424 -2.43532 0.69349  
H -3.51446 -2.85621 -0.78341  
H 2.98678 1.26036 -0.08810  
Br 3.75578 -1.54184 -0.07577  
Br 0.83387 3.28031 -0.07962  
O -5.24796 -0.02151 -0.21187  
H -5.69846 -1.67506 -1.29959  
H -4.27191 -0.76803 -1.87935  
H -3.60985 1.18850 -0.59321  
H -4.58420 1.57379 0.85483  
H -1.40167 -2.48083 -0.48225  
H -2.39516 0.47129 1.51985  
H -3.80853 -0.50894 1.95268

|                                       |                      |
|---------------------------------------|----------------------|
| SCF energy:                           | -5754.477992 hartree |
| zero-point correction:                | +0.221867 hartree    |
| enthalpy correction:                  | +0.236919 hartree    |
| free energy correction:               | +0.178553 hartree    |
| quasiharmonic free energy correction: | +0.180079 hartree    |

## 5.9 Azaquinone Methide *cis*-4e

C 0.72903 0.70951 -0.84838  
C 1.95279 1.19502 -0.20990  
Br 2.19226 3.06891 -0.08744  
C 2.94629 0.37893 0.23638  
H 3.85724 0.79871 0.65127  
C 2.79526 -1.03028 0.14260  
Br 4.22945 -2.13389 0.69910  
C 1.63224 -1.57122 -0.31999  
H 1.49455 -2.64882 -0.35282  
C 0.54941 -0.73469 -0.70936  
C -0.64935 -1.41863 -1.02948  
N -1.89344 -1.01125 -0.91209  
N -0.10232 1.43086 -1.54686  
H 0.18845 2.40849 -1.53691

C -2.97025 -1.89637 -1.41654  
C -2.25580 0.19623 -0.15751  
C -4.26560 -1.11752 -1.60268  
H -3.12121 -2.70454 -0.69201  
H -2.63352 -2.32457 -2.36109  
C -3.63234 0.10316 0.44736  
H -2.17360 1.06043 -0.82940  
H -1.50136 0.33752 0.62257  
C -4.65884 -0.49702 -0.29072  
H -5.03925 -1.79981 -1.96389  
H -4.11897 -0.34378 -2.36755  
C -5.95294 -0.53210 0.22835  
C -3.90417 0.66485 1.69522  
C -5.20320 0.64038 2.20411  
C -6.22810 0.04236 1.47013  
H -3.10040 1.12362 2.26594  
H -5.41222 1.08064 3.17459  
H -6.74528 -1.01133 -0.34156  
H -7.23862 0.01547 1.86717  
H -0.55221 -2.45071 -1.36929

|                           |             |                      |
|---------------------------|-------------|----------------------|
|                           | SCF energy: | -5870.967822 hartree |
| zero-point                | correction: | +0.267971 hartree    |
| enthalpy                  | correction: | +0.285885 hartree    |
| free energy               | correction: | +0.220008 hartree    |
| quasiharmonic free energy | correction: | +0.223984 hartree    |

## 5.10 Azaquinone Methide *trans*-4e

C 1.68094 -1.47300 0.10355  
C 2.92355 -0.70600 0.15910  
Br 4.53719 -1.65781 0.44167  
C 2.98063 0.64846 0.04931  
H 3.93114 1.16661 0.13037  
C 1.79039 1.38922 -0.17595  
Br 1.91926 3.27134 -0.34083  
C 0.58877 0.75828 -0.31499  
H -0.28651 1.34462 -0.56212  
C 0.50084 -0.65814 -0.21443  
C -0.65393 -1.40658 -0.53794  
N -1.92227 -1.06346 -0.58017  
N 1.56493 -2.75246 0.32709  
H 2.48328 -3.17335 0.46076  
C -2.89867 -2.05869 -1.08456  
C -2.42424 0.22848 -0.07988  
C -4.16343 -1.37208 -1.58415  
H -3.14630 -2.74368 -0.26638  
H -2.41518 -2.62037 -1.88424  
C -3.87590 0.17279 0.32160  
H -2.30370 0.97931 -0.87166  
H -1.80696 0.52530 0.77204  
C -4.76468 -0.57254 -0.46114  
H -4.86084 -2.13377 -1.94178



H -3.91545 -0.72266 -2.43406  
C -6.12274 -0.57949 -0.14285  
C -4.34480 0.90736 1.41061  
C -5.70606 0.90853 1.71603  
C -6.59507 0.16598 0.93811  
H -3.64648 1.47886 2.01711  
H -6.06960 1.48162 2.56370  
H -6.81002 -1.17065 -0.74306  
H -7.65417 0.15954 1.17846  
H -0.46728 -2.44887 -0.79118

SCF energy: -5870.969932 hartree  
zero-point correction: +0.268716 hartree  
enthalpy correction: +0.286552 hartree  
free energy correction: +0.221225 hartree  
quasiharmonic free energy correction: +0.224473 hartree

## 5.11 Azaquinone Methide *cis-4f*

C 0.73671 0.76094 -0.50580  
C 2.08899 1.20378 -0.16267  
Br 2.40828 3.06840 -0.09518  
C 3.13235 0.35412 0.04033  
H 4.12698 0.74205 0.23641  
C 2.91999 -1.04923 -0.02336  
Br 4.41059 -2.20025 0.17481  
C 1.66534 -1.55030 -0.20616  
H 1.49096 -2.62299 -0.21044  
C 0.54746 -0.67804 -0.33077  
C -0.71133 -1.32647 -0.34549  
N -1.88251 -0.88114 0.05360  
N -0.20776 1.51232 -0.99685  
H 0.10752 2.48108 -1.05095  
C -2.04381 0.33842 0.85575  
C -3.05629 -1.77541 -0.10996  
C -3.31955 0.27339 1.69346  
H -2.05715 1.20319 0.18519  
H -1.15571 0.43138 1.48935  
C -4.34038 -0.99427 -0.15292  
H -3.06879 -2.46716 0.74318  
H -2.92119 -2.35550 -1.02300  
C -4.49876 0.02399 0.79506  
H -3.42604 1.21733 2.23378  
H -3.23432 -0.52860 2.43860  
C -5.68555 0.75507 0.82823  
C -5.36058 -1.28246 -1.05755  
C -6.55259 -0.55755 -1.01048  
C -6.71389 0.45947 -0.06883  
H -5.22548 -2.07086 -1.79383  
H -7.35019 -0.78166 -1.71243  
H -5.80481 1.55467 1.55521  
H -7.63875 1.02801 -0.03737  
H -0.72005 -2.36701 -0.67085

```
SCF energy: -5870.967500 hartree
zero-point correction: +0.268243 hartree
enthalpy correction: +0.286074 hartree
free energy correction: +0.220667 hartree
quasiharmonic free energy correction: +0.224309 hartree
```

## 5.12 Azaquinone Methide *trans*-4f

```
C 1.66909 -1.46118 0.17509
C 2.94918 -0.78374 -0.02091
Br 4.50969 -1.85538 -0.10210
C 3.08423 0.56480 -0.13274
H 4.06645 1.00987 -0.25707
C 1.93202 1.39342 -0.09030
Br 2.16340 3.26630 -0.24653
C 0.68631 0.85404 0.04421
H -0.17372 1.50876 0.01179
C 0.51374 -0.55421 0.14891
C -0.73976 -1.20701 0.10195
N -1.95195 -0.76171 0.34788
N 1.51155 -2.73897 0.38263
H 2.40550 -3.22127 0.30582
C -2.23905 0.55726 0.93697
C -3.09032 -1.69426 0.14527
C -3.61013 0.56809 1.61059
H -2.22706 1.31352 0.14443
H -1.44727 0.78189 1.65680
C -4.36422 -0.95856 -0.16753
H -3.21472 -2.26912 1.07228
H -2.82856 -2.38487 -0.65606
C -4.65918 0.16708 0.61142
H -3.79601 1.57111 2.00229
H -3.60480 -0.12662 2.46046
C -5.85038 0.85950 0.39857
C -5.25420 -1.39039 -1.14938
C -6.45213 -0.70208 -1.34913
C -6.74919 0.42038 -0.57545
H -5.01368 -2.26194 -1.75319
H -7.14833 -1.03802 -2.11178
H -6.07519 1.74063 0.99433
H -7.67851 0.95944 -0.73504
H -0.69563 -2.25980 -0.17177
```

```
SCF energy: -5870.970183 hartree
zero-point correction: +0.268473 hartree
enthalpy correction: +0.286372 hartree
free energy correction: +0.220402 hartree
quasiharmonic free energy correction: +0.224224 hartree
```

### 5.13 Azaquinone Methide *cis*-4g

C 2.51066 -0.67144 0.75548  
C 3.67249 -1.49529 0.44483  
C 4.68827 -1.04419 -0.34289  
H 5.55924 -1.67481 -0.50570  
C 4.64278 0.25409 -0.94593  
C 3.51368 1.00738 -0.79205  
H 3.43607 1.97729 -1.27984  
C 2.37343 0.53770 -0.05801  
C 1.23283 1.35849 -0.14378  
N -0.04877 1.05627 -0.01032  
N 1.69248 -0.93047 1.74686  
H 1.97896 -1.80298 2.19574  
C -1.04466 2.13908 -0.11779  
C -0.51531 -0.33165 -0.00264  
C -2.26240 1.82177 0.73782  
H -1.34505 2.24313 -1.16767  
H -0.56786 3.06396 0.20669  
C -2.00624 -0.48059 -0.15921  
H -0.17723 -0.79424 0.93749  
H 0.01217 -0.86643 -0.80342  
C -2.87611 0.53220 0.26119  
H -2.98045 2.64289 0.66049  
H -1.95705 1.74416 1.78918  
C -4.25624 0.33303 0.17941  
C -2.52530 -1.67953 -0.65548  
C -3.90313 -1.87753 -0.72267  
C -4.77215 -0.86921 -0.30223  
H -1.84543 -2.46081 -0.98767  
H -4.29705 -2.81294 -1.10896  
H -4.92751 1.12889 0.49339  
H -5.84683 -1.01526 -0.35911  
H 1.40416 2.39608 -0.43210  
H 5.47869 0.61384 -1.53615  
H 3.73369 -2.46929 0.92578

|                                       |                     |
|---------------------------------------|---------------------|
| SCF energy:                           | -728.550196 hartree |
| zero-point correction:                | +0.286805 hartree   |
| enthalpy correction:                  | +0.302044 hartree   |
| free energy correction:               | +0.244430 hartree   |
| quasiharmonic free energy correction: | +0.247112 hartree   |

### 5.14 Azaquinone Methide *trans*-4g

C -3.51545 0.66419 0.54150  
C -4.71842 -0.11909 0.29153  
C -4.67415 -1.34268 -0.30121  
H -5.59575 -1.90279 -0.44192  
C -3.43860 -1.90739 -0.75603  
C -2.28313 -1.19293 -0.61162  
H -1.37149 -1.60912 -1.02188  
C -2.26564 0.10822 -0.00528

C -1.17311 0.99011 0.01051  
 N 0.12228 0.79953 -0.18170  
 N -3.51974 1.78015 1.22707  
 H -4.48282 2.01900 1.46737  
 C 1.00956 1.98233 -0.19319  
 C 0.72513 -0.53804 -0.28730  
 C 2.27223 1.70331 -0.99855  
 H 1.27882 2.23229 0.83982  
 H 0.44997 2.81422 -0.62217  
 C 2.20173 -0.54823 0.02123  
 H 0.57584 -0.91097 -1.30921  
 H 0.19466 -1.20530 0.39787  
 C 2.99169 0.53186 -0.38859  
 H 2.90380 2.59550 -0.99378  
 H 2.00095 1.49243 -2.04136  
 C 4.36982 0.49816 -0.17269  
 C 2.79090 -1.65181 0.63949  
 C 4.17068 -1.68609 0.84154  
 C 4.96083 -0.61082 0.43347  
 H 2.17000 -2.48440 0.96132  
 H 4.62589 -2.54633 1.32324  
 H 4.97946 1.34490 -0.47875  
 H 6.03443 -0.63100 0.59659  
 H -1.43183 2.02545 0.22755  
 H -3.43032 -2.87736 -1.24148  
 H -5.66385 0.29917 0.63050

|                                       |                     |
|---------------------------------------|---------------------|
| SCF energy:                           | -728.551657 hartree |
| zero-point correction:                | +0.287514 hartree   |
| enthalpy correction:                  | +0.302789 hartree   |
| free energy correction:               | +0.245060 hartree   |
| quasiharmonic free energy correction: | +0.247538 hartree   |

## 5.15 Azaquinone Methide *cis*-4h

C -2.63864 -0.80368 -0.62567  
 C -3.99342 -1.29706 -0.39871  
 C -5.00204 -0.47596 0.00489  
 H -6.00749 -0.87690 0.11045  
 C -4.77198 0.91278 0.27524  
 C -3.49317 1.38792 0.21097  
 H -3.28491 2.42732 0.45871  
 C -2.37811 0.54280 -0.10949  
 C -1.11399 1.13797 0.04254  
 N 0.06758 0.58264 0.26174  
 N -1.74058 -1.45981 -1.31548  
 H -2.13558 -2.35795 -1.60278  
 C 0.22111 -0.81168 0.69122  
 C 1.24722 1.47588 0.34085  
 C 1.52571 -1.00618 1.46347  
 H 0.18224 -1.46351 -0.18703  
 H -0.64506 -1.06017 1.31418  
 C 2.51745 0.73221 0.03066

H 1.29704 1.88628 1.35915  
H 1.10142 2.30216 -0.35552  
C 2.68167 -0.52122 0.63342  
H 1.63033 -2.06638 1.70764  
H 1.48186 -0.45015 2.40945  
C 3.85246 -1.24501 0.41003  
C 3.51791 1.25957 -0.78403  
C 4.69440 0.53748 -0.99279  
C 4.86041 -0.71301 -0.39666  
H 3.37910 2.23026 -1.25386  
H 5.47553 0.94695 -1.62645  
H 3.97604 -2.22352 0.86749  
H 5.77248 -1.27819 -0.56542  
H -1.08966 2.22855 0.04369  
H -5.59648 1.56032 0.55351  
H -4.18797 -2.34181 -0.63261

SCF energy: -728.550048 hartree  
zero-point correction: +0.287459 hartree  
enthalpy correction: +0.302540 hartree  
free energy correction: +0.245966 hartree  
quasiharmonic free energy correction: +0.247954 hartree

## 5.16 Azaquinone Methide *trans*-4h

C -3.48829 0.96138 0.08999  
C -4.73438 0.37651 -0.38910  
C -4.82841 -0.93137 -0.75056  
H -5.78683 -1.32840 -1.07722  
C -3.68803 -1.79790 -0.71912  
C -2.47539 -1.29357 -0.34342  
H -1.61587 -1.95043 -0.38044  
C -2.30712 0.08119 0.03439  
C -1.08142 0.72837 0.25639  
N 0.14183 0.26610 0.45952  
N -3.40882 2.17993 0.56324  
H -4.31785 2.63447 0.46827  
C 0.45518 -1.15566 0.67035  
C 1.24508 1.24452 0.60642  
C 1.83870 -1.32959 1.29747  
H 0.43472 -1.67497 -0.29417  
H -0.31728 -1.58214 1.31690  
C 2.53927 0.68882 0.07830  
H 1.35209 1.47982 1.67406  
H 0.96854 2.15855 0.08048  
C 2.86510 -0.61869 0.46025  
H 2.05576 -2.39785 1.37204  
H 1.83048 -0.91972 2.31590  
C 4.06338 -1.18528 0.02776  
C 3.40735 1.42644 -0.72444  
C 4.61312 0.86035 -1.14268  
C 4.93953 -0.44325 -0.76724  
H 3.14282 2.43846 -1.02080

H 5.29224 1.43356 -1.76681  
H 4.31145 -2.20479 0.31283  
H 5.87420 -0.88571 -1.09942  
H -1.14505 1.81492 0.27038  
H -3.78420 -2.83527 -1.02115  
H -5.60836 1.02380 -0.41874

SCF energy: -728.552369 hartree  
zero-point correction: +0.287512 hartree  
enthalpy correction: +0.302738 hartree  
free energy correction: +0.245113 hartree  
quasiharmonic free energy correction: +0.247720 hartree

## 5.17 Azaquinone Methide *cis-4i*

C 0.75888 0.97755 -0.43051  
C 2.21064 1.06230 -0.22523  
Br 3.01554 2.76864 -0.37424  
C 3.00355 -0.01221 0.01438  
H 4.07702 0.10742 0.12167  
C 2.42532 -1.31258 0.10948  
Br 3.58176 -2.78850 0.36683  
C 1.08039 -1.47969 0.02340  
H 0.63502 -2.46613 0.12041  
C 0.21046 -0.35748 -0.15379  
C -1.15700 -0.66800 -0.14995  
N -2.19933 0.12332 0.10260  
N 0.00607 1.93835 -0.87157  
C -2.08937 1.31652 0.95520  
C -4.48122 1.07675 1.64859  
C -3.51195 -0.30691 -0.25527  
H 0.56343 2.77667 -1.03582  
C -4.62471 0.12324 0.48657  
C -5.88711 -0.33609 0.10159  
C -3.67811 -1.13341 -1.37442  
C -4.94483 -1.58289 -1.72978  
C -6.05717 -1.18803 -0.98625  
H -2.82057 -1.39522 -1.98645  
H -5.06144 -2.22268 -2.59894  
H -6.75103 -0.01472 0.67876  
H -7.05066 -1.52881 -1.26099  
C -3.04087 1.15647 2.13516  
H -5.15310 0.77155 2.45657  
H -4.81031 2.07186 1.32183  
H -2.76942 0.25040 2.68967  
H -2.90830 2.00959 2.80624  
H -2.32214 2.20812 0.36517  
H -1.06129 1.38770 1.29998  
H -1.42131 -1.70555 -0.35108

```
SCF energy: -5870.970442 hartree
zero-point correction: +0.268340 hartree
enthalpy correction: +0.286069 hartree
free energy correction: +0.221432 hartree
quasiharmonic free energy correction: +0.224252 hartree
```

## 5.18 Azaquinone Methide *trans*-4i

```
C 1.16441 -1.37862 0.34537
C 2.56106 -1.00129 0.11837
Br 3.86687 -2.36712 0.20406
C 2.96316 0.27399 -0.11450
H 4.01609 0.50386 -0.24331
C 1.99883 1.32102 -0.20366
Br 2.61808 3.07162 -0.56696
C 0.67024 1.06222 -0.07118
H -0.05158 1.85651 -0.22535
C 0.21811 -0.27075 0.16959
C -1.12906 -0.64126 0.07624
N -2.21205 0.11819 0.23515
N 0.73942 -2.55603 0.69707
C -2.20484 1.35808 1.03258
C -4.66817 1.16930 1.41821
C -3.47470 -0.33059 -0.26220
H 1.50795 -3.22634 0.69992
C -4.66693 0.14933 0.30451
C -5.87725 -0.32630 -0.20857
C -3.51132 -1.21992 -1.34543
C -4.72889 -1.68268 -1.83022
C -5.92115 -1.24051 -1.25655
H -2.59132 -1.52591 -1.83236
H -4.74227 -2.37297 -2.66796
H -6.80204 0.03455 0.23542
H -6.87638 -1.59383 -1.63237
C -3.30424 1.27941 2.08318
H -5.43848 0.90769 2.14983
H -4.95041 2.14270 0.99652
H -3.11488 0.40961 2.72244
H -3.25064 2.17293 2.71096
H -2.34989 2.21871 0.36945
H -1.23313 1.43712 1.51588
H -1.32367 -1.68598 -0.15732
```

```
SCF energy: -5870.971898 hartree
zero-point correction: +0.268389 hartree
enthalpy correction: +0.286184 hartree
free energy correction: +0.221273 hartree
quasiharmonic free energy correction: +0.224083 hartree
```

## 6 Cartesian Coordinates and Energies of Azomethine Ylides 5

### 6.1 Azomethine Ylide 5a

C -0.38471 0.69919 -0.41323  
C 0.87764 1.20246 -0.08130  
Br 1.10407 3.08110 0.05657  
C 1.99564 0.39765 0.10759  
H 2.96020 0.83130 0.34309  
C 1.82518 -0.97551 -0.02414  
Br 3.32961 -2.11115 0.19728  
C 0.58657 -1.53244 -0.29123  
H 0.47200 -2.61025 -0.34981  
C -0.55178 -0.72060 -0.46871  
C -1.81674 -1.33248 -0.78746  
N -2.98865 -0.98819 -0.16653  
H -1.83320 -2.31840 -1.23615  
N -1.46251 1.52535 -0.68555  
H -1.22601 2.46781 -0.97139  
H -2.14598 1.10124 -1.30738  
C -4.25967 -1.55943 -0.69797  
C -3.23930 -0.15232 0.81717  
C -4.70564 -0.00997 1.07773  
H -2.43505 0.34753 1.33740  
C -5.26619 -1.27938 0.41241  
H -5.10719 0.89806 0.60499  
H -4.93112 0.05057 2.14574  
H -4.10323 -2.61609 -0.92082  
H -4.49313 -1.02597 -1.62429  
H -6.27744 -1.15320 0.02244  
H -5.26675 -2.10383 1.13108

|  |                                       |                      |
|--|---------------------------------------|----------------------|
|  | SCF energy:                           | -5679.277754 hartree |
|  | zero-point correction:                | +0.213918 hartree    |
|  | enthalpy correction:                  | +0.228825 hartree    |
|  | free energy correction:               | +0.170950 hartree    |
|  | quasiharmonic free energy correction: | +0.172773 hartree    |

### 6.2 Azomethine Ylide 5b

C 2.10723 0.88689 0.05370  
C 3.35979 0.28235 0.10522  
H 4.23509 0.91794 0.22300  
C 3.50962 -1.10619 0.01248  
H 4.49899 -1.55057 0.06433  
C 2.37837 -1.89453 -0.16200  
H 2.46686 -2.97247 -0.26458  
C 1.11225 -1.30503 -0.21121  
H 0.26600 -1.95099 -0.39966



C 0.92183 0.09047 -0.08199  
C -0.34593 0.76092 -0.11629  
N -1.57613 0.19332 -0.00666  
H -0.39548 1.83293 -0.22724  
N 2.00544 2.28016 0.21619  
H 2.90151 2.74448 0.11263  
H 1.32363 2.72967 -0.38516  
C -2.74192 1.13135 -0.07775  
C -2.01523 -1.03086 0.24488  
C -3.50702 -1.08790 0.36905  
H -1.34489 -1.84453 0.46542  
C -3.93393 0.21686 -0.31811  
H -3.81563 -1.10022 1.42514  
H -3.93334 -1.97762 -0.10351  
H -2.56084 1.86064 -0.86724  
H -2.79649 1.64365 0.88738  
H -4.85615 0.63813 0.08583  
H -4.06466 0.04870 -1.39091

|                           |             |                     |
|---------------------------|-------------|---------------------|
|                           | SCF energy: | -536.857724 hartree |
| zero-point                | correction: | +0.233275 hartree   |
| enthalpy                  | correction: | +0.245716 hartree   |
| free energy               | correction: | +0.195553 hartree   |
| quasiharmonic free energy | correction: | +0.196827 hartree   |

### 6.3 Azomethine Ylide 5c

C -0.12035 0.69895 -0.41086  
C 1.14755 1.19759 -0.10077  
C 2.26203 0.38800 0.09728  
C 2.07784 -0.98528 -0.00247  
C 0.83266 -1.53807 -0.24956  
H 0.71051 -2.61603 -0.28538  
C -0.30060 -0.72194 -0.44352  
C -1.56190 -1.32898 -0.78089  
N -2.76030 -0.98732 -0.18032  
H -1.56226 -2.32834 -1.20140  
N -1.19703 1.52702 -0.68313  
H -0.95785 2.46409 -0.98439  
H -1.88584 1.09719 -1.29590  
C -3.94807 -1.68799 -0.74999  
C -2.91126 -0.16898 0.83646  
C -4.22982 0.34775 1.32362  
H -2.00185 0.19669 1.29675  
C -5.22079 -0.87748 -0.59469  
H -4.02795 -2.64369 -0.22133  
H -3.72151 -1.88289 -1.79805  
H 3.23180 0.81896 0.31535  
Br 1.39218 3.07698 -0.00806  
Br 3.57454 -2.12954 0.23062  
H -6.05430 -1.48009 -0.96758  
H -5.16111 0.02561 -1.21558  
H -4.35114 1.38017 0.95947

H -4.18759 0.41770 2.41554  
C -5.41663 -0.49644 0.86795  
H -6.34859 0.05846 1.00856  
H -5.47994 -1.40912 1.47310

SCF energy: -5718.573809 hartree  
zero-point correction: +0.243403 hartree  
enthalpy correction: +0.259314 hartree  
free energy correction: +0.199273 hartree  
quasiharmonic free energy correction: +0.201292 hartree

#### 6.4 Azomethine Ylide 5d

C -0.12358 0.70902 -0.42769  
C 1.14598 1.19968 -0.10225  
C 2.25038 0.38000 0.09903  
C 2.06185 -0.99257 -0.01139  
C 0.81542 -1.53557 -0.27221  
H 0.68431 -2.61216 -0.31645  
C -0.30814 -0.70845 -0.46694  
C -1.57689 -1.30817 -0.80246  
N -2.75849 -0.97259 -0.18859  
H -1.59117 -2.28579 -1.26957  
N -1.19104 1.54536 -0.70281  
H -0.94732 2.48415 -0.99455  
H -1.88728 1.12505 -1.31308  
C -3.95597 -1.68439 -0.71027  
C -2.92599 -0.15215 0.82682  
C -4.27419 0.30824 1.29249  
H -2.04480 0.27164 1.28923  
C -5.20350 -0.85988 -0.48733  
H -4.02288 -2.63809 -0.17980  
H -3.79773 -1.86537 -1.77372  
H 3.22129 0.80292 0.32865  
Br 1.40075 3.07657 0.00442  
Br 3.54959 -2.14427 0.23196  
O -5.33099 -0.54516 0.89042  
H -6.08343 -1.43735 -0.77665  
H -5.17244 0.06486 -1.08201  
H -4.47088 1.32856 0.91931  
H -4.28704 0.34866 2.38487

SCF energy: -5754.459697 hartree  
zero-point correction: +0.219697 hartree  
enthalpy correction: +0.235327 hartree  
free energy correction: +0.175927 hartree  
quasiharmonic free energy correction: +0.177722 hartree

#### 6.5 Azomethine Ylide 5e

C 0.65473 0.57403 -0.67566  
C 1.82868 1.20803 -0.24300

Br 1.90228 3.10083 -0.26311  
 C 2.96116 0.51470 0.16080  
 H 3.85403 1.04651 0.46846  
 C 2.91191 -0.87519 0.14921  
 Br 4.44626 -1.85484 0.67845  
 C 1.76136 -1.55171 -0.21565  
 H 1.72866 -2.63624 -0.18613  
 C 0.60673 -0.85079 -0.60740  
 C -0.55810 -1.60697 -1.01850  
 N -1.81711 -1.34830 -0.60253  
 N -0.42916 1.28257 -1.14506  
 H -0.24582 2.22107 -1.47668  
 H -1.04493 0.76257 -1.76168  
 C -2.88953 -2.21783 -1.16399  
 C -2.18932 -0.45847 0.32440  
 C -4.12334 -1.39669 -1.49280  
 H -3.11416 -2.97227 -0.40325  
 H -2.48745 -2.70562 -2.05030  
 C -3.57645 -0.17784 0.59929  
 H -1.40688 0.03311 0.88705  
 C -4.58538 -0.63717 -0.27701  
 H -4.90502 -2.06810 -1.85932  
 H -3.88499 -0.69570 -2.30452  
 C -5.91953 -0.34833 -0.01342  
 C -3.94794 0.57893 1.72704  
 C -5.28683 0.86463 1.97596  
 C -6.28122 0.40148 1.11025  
 H -3.17659 0.93785 2.40422  
 H -5.55690 1.44858 2.85140  
 H -6.68519 -0.71032 -0.69624  
 H -7.32622 0.62087 1.30686  
 H -0.42479 -2.55647 -1.52102

|  |                                       |                      |
|--|---------------------------------------|----------------------|
|  | SCF energy:                           | -5870.970947 hartree |
|  | zero-point correction:                | +0.267258 hartree    |
|  | enthalpy correction:                  | +0.285290 hartree    |
|  | free energy correction:               | +0.220115 hartree    |
|  | quasiharmonic free energy correction: | +0.223288 hartree    |

## 6.6 Azomethine Ylide 5f

C 0.60132 0.58100 -0.26832  
 C 1.83785 1.21685 -0.12064  
 Br 1.89524 3.11302 -0.10853  
 C 3.04405 0.53140 -0.02649  
 H 3.98106 1.06681 0.06853  
 C 2.99596 -0.85692 -0.06621  
 Br 4.62144 -1.83184 0.03705  
 C 1.79610 -1.54150 -0.15676  
 H 1.78280 -2.62689 -0.14791  
 C 0.57016 -0.85061 -0.23829  
 C -0.65487 -1.59131 -0.40031  
 N -1.79317 -1.32411 0.33189

N -0.57816 1.28506 -0.43341  
 H -0.47738 2.23290 -0.77577  
 H -1.28793 0.76912 -0.94725  
 C -1.91572 -0.48354 1.33397  
 C -3.01802 -2.06018 -0.07725  
 C -3.26460 -0.13365 1.88550  
 H -1.01566 -0.03454 1.73148  
 C -4.17439 -1.10519 -0.20336  
 H -3.21748 -2.80667 0.70034  
 H -2.81020 -2.56729 -1.01856  
 C -4.31257 -0.14095 0.79990  
 H -3.21169 0.84412 2.37141  
 H -3.55387 -0.85470 2.66808  
 C -5.37787 0.75714 0.75174  
 C -5.09222 -1.17204 -1.25057  
 C -6.16268 -0.27728 -1.29017  
 C -6.30445 0.68549 -0.28997  
 H -4.97143 -1.92023 -2.02994  
 H -6.88013 -0.32711 -2.10379  
 H -5.48053 1.51343 1.52601  
 H -7.13267 1.38725 -0.32469  
 H -0.61777 -2.59651 -0.80227

|                                       |                      |
|---------------------------------------|----------------------|
| SCF energy:                           | -5870.956613 hartree |
| zero-point correction:                | +0.266646 hartree    |
| enthalpy correction:                  | +0.284766 hartree    |
| free energy correction:               | +0.219109 hartree    |
| quasiharmonic free energy correction: | +0.222604 hartree    |

## 6.7 Azomethine Ylide 5g

C 2.45308 -0.58603 0.75147  
 C 3.58174 -1.41982 0.66962  
 C 4.63859 -1.11732 -0.17861  
 H 5.50403 -1.77288 -0.21161  
 C 4.59385 0.03643 -0.97096  
 C 3.46827 0.84752 -0.92272  
 H 3.41482 1.73529 -1.54862  
 C 2.36280 0.55005 -0.09810  
 C 1.23959 1.47355 -0.07367  
 N -0.05096 1.10714 -0.15256  
 N 1.44029 -0.88489 1.65025  
 H 1.72408 -1.46570 2.43020  
 H 0.87435 -0.09640 1.94511  
 C -1.05501 2.20671 -0.12452  
 C -0.52944 -0.13306 -0.36079  
 C -2.25597 1.81262 0.71722  
 H -1.35030 2.38943 -1.16295  
 H -0.56394 3.09335 0.27301  
 C -1.93654 -0.42480 -0.30760  
 H 0.18960 -0.90846 -0.58629  
 C -2.84938 0.52454 0.21069  
 H -2.98873 2.62428 0.68849

H -1.93721 1.69283 1.76211  
 C -4.20642 0.22960 0.26973  
 C -2.43563 -1.67043 -0.74206  
 C -3.79558 -1.95441 -0.66925  
 C -4.69286 -1.00723 -0.16738  
 H -1.74429 -2.41001 -1.13918  
 H -4.15947 -2.91980 -1.01066  
 H -4.89223 0.97414 0.66902  
 H -5.75478 -1.22726 -0.11603  
 H 1.42307 2.53553 -0.18015  
 H 5.42161 0.28894 -1.62642  
 H 3.62764 -2.29654 1.31172

|  |                                       |                     |
|--|---------------------------------------|---------------------|
|  | SCF energy:                           | -728.554132 hartree |
|  | zero-point correction:                | +0.286242 hartree   |
|  | enthalpy correction:                  | +0.301597 hartree   |
|  | free energy correction:               | +0.244756 hartree   |
|  | quasiharmonic free energy correction: | +0.246703 hartree   |

## 6.8 Azomethine Ylide 5h

C -2.45467 -0.80722 -0.51049  
 C -3.71173 -1.42878 -0.49044  
 C -4.86529 -0.71073 -0.19174  
 H -5.82866 -1.21243 -0.19731  
 C -4.77677 0.65561 0.09604  
 C -3.52946 1.26933 0.11986  
 H -3.45439 2.32571 0.36894  
 C -2.33537 0.56649 -0.15234  
 C -1.06811 1.27137 -0.18176  
 N 0.04911 0.82266 0.47963  
 N -1.32222 -1.53205 -0.87157  
 H -1.51657 -2.34954 -1.43839  
 H -0.58231 -0.96301 -1.27453  
 C 0.16459 -0.24072 1.25091  
 C 1.27726 1.63935 0.29541  
 C 1.50775 -0.69264 1.74543  
 H -0.73443 -0.79145 1.48829  
 C 2.44942 0.75348 -0.02694  
 H 1.44654 2.17663 1.23618  
 H 1.09087 2.35925 -0.50024  
 C 2.58108 -0.42173 0.71954  
 H 1.46296 -1.75775 1.98812  
 H 1.77173 -0.17277 2.68200  
 C 3.65824 -1.27389 0.47841  
 C 3.38451 1.07662 -1.00894  
 C 4.46646 0.22583 -1.24089  
 C 4.60227 -0.94727 -0.49731  
 H 3.26655 1.98829 -1.58924  
 H 5.19649 0.47427 -2.00542  
 H 3.75754 -2.19303 1.05066  
 H 5.43975 -1.61359 -0.68278  
 H -1.06009 2.33661 -0.37880

H -5.67060 1.23118 0.31839  
H -3.77462 -2.48333 -0.75066

SCF energy: -728.537936 hartree  
zero-point correction: +0.285951 hartree  
enthalpy correction: +0.301316 hartree  
free energy correction: +0.244385 hartree  
quasiharmonic free energy correction: +0.246266 hartree

## 6.9 Azomethine Ylide 5i

C 0.66636 0.79732 -0.31508  
C 2.02311 1.10841 -0.20113  
Br 2.55796 2.92312 -0.33917  
C 3.01818 0.15024 -0.03776  
H 4.06108 0.43562 0.02603  
C 2.61674 -1.17855 0.03070  
Br 3.94262 -2.52242 0.23072  
C 1.28270 -1.54297 -0.01623  
H 0.99557 -2.58525 0.08059  
C 0.26933 -0.57193 -0.16654  
C -1.09941 -0.99430 -0.28741  
N -2.13860 -0.35584 0.38246  
N -0.30247 1.75901 -0.54688  
C -1.96402 0.55786 1.31851  
C -4.06898 1.66726 0.66221  
C -3.50329 -0.67367 -0.01294  
C -4.47181 0.33166 0.09858  
C -5.78080 0.04004 -0.28846  
C -3.83565 -1.94632 -0.47391  
C -5.15049 -2.21735 -0.84643  
C -6.12364 -1.22285 -0.76573  
H -3.09670 -2.73626 -0.53294  
H -5.40877 -3.21139 -1.19760  
H -6.53523 0.81808 -0.20605  
H -7.14721 -1.43379 -1.05989  
C -3.07835 1.42640 1.79932  
H -4.95086 2.21054 1.01023  
H -3.58733 2.27309 -0.11678  
H -3.59413 0.95408 2.64924  
H -2.65534 2.36608 2.16496  
H -1.28977 -2.01982 -0.56369  
H -0.96096 0.66180 1.71067  
H -1.10107 1.40270 -1.06720  
H 0.03811 2.63004 -0.93702

SCF energy: -5870.950816 hartree  
zero-point correction: +0.266781 hartree  
enthalpy correction: +0.284820 hartree  
free energy correction: +0.219929 hartree  
quasiharmonic free energy correction: +0.222634 hartree

## 7 Cartesian Coordinates and Energies of Zwitterions 7

### 7.1 Zwitterion 7a

C -0.43726 0.82207 -0.56227  
C 0.87546 1.22871 -0.13563  
Br 1.19235 3.08632 0.10924  
C 1.92463 0.35936 0.09336  
H 2.89080 0.74313 0.40555  
C 1.72910 -1.01053 -0.07338  
Br 3.16247 -2.21221 0.24360  
C 0.48464 -1.48891 -0.46792  
H 0.32377 -2.55567 -0.60160  
C -0.56368 -0.61051 -0.70722  
C -1.86962 -1.14552 -1.19921  
N -2.99015 -0.93983 -0.26215  
N -1.48636 1.60397 -0.79440  
H -1.21734 2.57705 -0.65807  
C -4.37926 -1.17145 -0.71621  
C -2.93061 -0.40607 0.89878  
C -4.27732 -0.21592 1.50108  
H -1.97772 -0.12647 1.33629  
C -5.18252 -1.05914 0.58298  
H -4.50505 0.85745 1.45477  
H -4.29560 -0.51071 2.55232  
H -4.43879 -2.14415 -1.20752  
H -4.61536 -0.38601 -1.44171  
H -6.15847 -0.60269 0.41900  
H -5.32803 -2.05095 1.01721  
H -2.18191 -0.63629 -2.11901  
H -1.82092 -2.22012 -1.39688

|                                       |                      |
|---------------------------------------|----------------------|
| SCF energy:                           | -5679.284778 hartree |
| zero-point correction:                | +0.214663 hartree    |
| enthalpy correction:                  | +0.229530 hartree    |
| free energy correction:               | +0.170341 hartree    |
| quasiharmonic free energy correction: | +0.173365 hartree    |

### 7.2 Zwitterion 7b

C 1.36570 0.84890 -0.49989  
C 2.67391 1.18804 -0.00963  
H 2.99307 2.22617 -0.09043  
C 3.52395 0.24873 0.54783  
H 4.50377 0.56765 0.89881  
C 3.14868 -1.10029 0.66844  
H 3.81868 -1.83350 1.10514  
C 1.88528 -1.46654 0.20313  
H 1.56513 -2.50552 0.27442

C 1.00949 -0.54195 -0.36523  
 C -0.30482 -0.99453 -0.91178  
 N -1.47515 -0.44787 -0.19255  
 N 0.49216 1.71623 -1.02903  
 H 0.92964 2.63849 -1.05530  
 C -2.83464 -0.63620 -0.74394  
 C -1.45116 0.35115 0.80621  
 C -2.80970 0.83099 1.17807  
 H -0.51250 0.62748 1.27417  
 C -3.73371 -0.10725 0.37828  
 H -2.88466 1.87824 0.85687  
 H -2.96592 0.80724 2.25855  
 H -2.98039 -1.69094 -0.98378  
 H -2.89594 -0.04631 -1.66424  
 H -4.61457 0.40184 -0.01259  
 H -4.06084 -0.93387 1.01311  
 H -0.40821 -2.08341 -0.88546  
 H -0.44408 -0.65843 -1.94721

|                           |             |                     |
|---------------------------|-------------|---------------------|
|                           | SCF energy: | -536.861143 hartree |
| zero-point                | correction: | +0.233447 hartree   |
| enthalpy                  | correction: | +0.245584 hartree   |
| free energy               | correction: | +0.195698 hartree   |
| quasiharmonic free energy | correction: | +0.197011 hartree   |

### 7.3 Zwitterion 7c

C -0.07387 0.94890 -0.60647  
 C 1.26224 1.20409 -0.13539  
 C 2.19970 0.22163 0.11661  
 C 1.86073 -1.11719 -0.07530  
 C 0.58634 -1.45076 -0.51833  
 H 0.31540 -2.49162 -0.67691  
 C -0.35143 -0.45948 -0.77846  
 C -1.68303 -0.84099 -1.33458  
 N -2.84007 -0.65053 -0.41503  
 N -1.02419 1.84199 -0.85684  
 H -0.65768 2.77909 -0.69780  
 C -4.14296 -1.04428 -0.99722  
 C -2.71704 -0.16214 0.76264  
 C -3.84999 0.05081 1.69997  
 C -5.30735 -0.40497 -0.26144  
 H -4.18574 -2.13794 -0.95512  
 H -4.11469 -0.74438 -2.04684  
 H 3.19145 0.49346 0.46398  
 Br 1.77614 3.01314 0.13944  
 Br 3.14392 -2.47193 0.26855  
 H -6.23232 -0.85618 -0.62955  
 H -5.34154 0.66582 -0.49483  
 H -3.95788 1.14146 1.79072  
 H -3.52429 -0.29787 2.68576  
 H -1.92173 -0.23081 -2.21215  
 H -1.70932 -1.89568 -1.62378



H -1.71177 0.10364 1.07818  
C -5.14851 -0.60544 1.24221  
H -5.99189 -0.17541 1.78737  
H -5.11951 -1.67753 1.46886

SCF energy: -5718.586421 hartree  
zero-point correction: +0.244372 hartree  
enthalpy correction: +0.260114 hartree  
free energy correction: +0.199741 hartree  
quasiharmonic free energy correction: +0.202231 hartree

#### 7.4 Zwitterion 7d

C -0.11664 0.91428 -0.60615  
C 1.21226 1.21524 -0.14103  
C 2.18180 0.26500 0.11092  
C 1.88717 -1.08538 -0.07626  
C 0.62361 -1.46253 -0.51328  
H 0.38621 -2.51211 -0.66754  
C -0.34711 -0.50291 -0.77332  
C -1.66703 -0.92961 -1.32187  
N -2.82074 -0.74092 -0.39848  
N -1.09799 1.77405 -0.85365  
H -0.76244 2.72360 -0.69967  
C -4.13715 -1.12343 -0.94630  
C -2.70744 -0.24088 0.77176  
C -3.87172 -0.04464 1.67921  
C -5.23358 -0.41670 -0.17751  
H -4.22290 -2.21101 -0.86878  
H -4.14905 -0.83689 -1.99995  
H 3.16474 0.57060 0.45511  
Br 1.66810 3.04051 0.12527  
Br 3.21421 -2.39600 0.26996  
O -5.05597 -0.64668 1.21518  
H -6.20705 -0.82233 -0.45392  
H -5.21695 0.66180 -0.38427  
H -3.99338 1.04182 1.81880  
H -3.62474 -0.47967 2.65225  
H -1.92790 -0.34337 -2.20959  
H -1.67362 -1.99110 -1.58582  
H -1.71968 0.05181 1.11668

SCF energy: -5754.468026 hartree  
zero-point correction: +0.220852 hartree  
enthalpy correction: +0.236195 hartree  
free energy correction: +0.176888 hartree  
quasiharmonic free energy correction: +0.178985 hartree

#### 7.5 Zwitterion 7e

C -0.53311 0.81944 0.88017

```

C -1.63064 1.33076 0.10250
Br -1.59567 3.16726 -0.38351
C -2.71595 0.57781 -0.30140
H -3.51442 1.03868 -0.87426
C -2.77469 -0.77457 0.03290
Br -4.26468 -1.81443 -0.51368
C -1.73883 -1.35549 0.75573
H -1.76873 -2.41294 1.00737
C -0.65458 -0.59170 1.16552
C 0.46902 -1.23920 1.91565
N 1.68381 -1.23379 1.06908
N 0.52048 1.49876 1.32588
H 0.44297 2.47051 1.02918
C 1.63218 -1.98399 -0.20295
C 2.63114 -0.38427 1.28585
C 3.03040 -2.38894 -0.63951
H 1.15710 -1.33323 -0.94646
H 0.99488 -2.85541 -0.04250
C 3.74802 -0.22759 0.37234
H 2.57669 0.20971 2.19155
C 3.95839 -1.20255 -0.61900
H 2.97888 -2.82496 -1.63997
H 3.41941 -3.16038 0.03783
C 5.03829 -1.05189 -1.48379
C 4.60550 0.87142 0.50583
C 5.67286 1.01483 -0.37298
C 5.88437 0.05290 -1.36423
H 4.42059 1.60515 1.28582
H 6.33855 1.86743 -0.28831
H 5.21856 -1.79686 -2.25387
H 6.71865 0.16326 -2.05073
H 0.24213 -2.28052 2.15583
H 0.72264 -0.69630 2.82980

```

|  |                                       |                      |
|--|---------------------------------------|----------------------|
|  | SCF energy:                           | -5870.962695 hartree |
|  | zero-point correction:                | 0.268819 hartree     |
|  | enthalpy correction:                  | 0.286491 hartree     |
|  | free energy correction:               | 0.221309 hartree     |
|  | quasiharmonic free energy correction: | 0.225022 hartree     |

## 7.6 Zwitterion 7f

```

C 0.94947 -1.17468 0.74539
C 2.13127 -1.12194 -0.07465
Br 2.77321 -2.75174 -0.81180
C 2.83826 0.03262 -0.34964
H 3.72915 -0.00961 -0.96822
C 2.39832 1.24759 0.17374
Br 3.36120 2.83895 -0.19988
C 1.24973 1.28871 0.95597
H 0.89236 2.23338 1.35820
C 0.54756 0.12426 1.23376

```

C -0.69560 0.18754 2.06507  
 N -1.87548 -0.13726 1.22368  
 N 0.23963 -2.25295 1.06659  
 H 0.66892 -3.07416 0.64288  
 C -2.48107 -1.26078 1.33778  
 C -2.16345 0.78474 0.10863  
 C -3.56735 -1.66881 0.40957  
 H -2.16947 -1.91425 2.14552  
 C -3.61169 0.72473 -0.29420  
 H -1.51161 0.49468 -0.72472  
 H -1.87922 1.78928 0.42890  
 C -4.30004 -0.48241 -0.16368  
 H -4.24093 -2.35644 0.92567  
 H -3.08000 -2.25006 -0.39020  
 C -5.63863 -0.56215 -0.55054  
 C -4.25739 1.84838 -0.81217  
 C -5.58920 1.76188 -1.21223  
 C -6.28010 0.55556 -1.08103  
 H -3.71638 2.78699 -0.90072  
 H -6.08984 2.63588 -1.61762  
 H -6.17500 -1.50049 -0.43557  
 H -7.32054 0.48819 -1.38445  
 H -0.85785 1.18888 2.47090  
 H -0.68354 -0.54477 2.87582

|                           |             |                      |
|---------------------------|-------------|----------------------|
|                           | SCF energy: | -5870.957117 hartree |
| zero-point                | correction: | 0.267689 hartree     |
| enthalpy                  | correction: | 0.285684 hartree     |
| free energy               | correction: | 0.218293 hartree     |
| quasiharmonic free energy | correction: | 0.223745 hartree     |

## 7.7 Zwitterion 7g

C -2.75502 0.87120 -0.21109  
 C -3.77701 0.47280 -1.14084  
 C -4.29849 -0.80867 -1.16352  
 H -5.07585 -1.04879 -1.88665  
 C -3.84693 -1.80144 -0.27599  
 C -2.84581 -1.45479 0.63175  
 H -2.46701 -2.20105 1.32981  
 C -2.31106 -0.16828 0.68366  
 C -1.21399 0.16099 1.64537  
 N 0.04880 0.38463 0.89111  
 N -2.21516 2.09712 -0.13699  
 H -2.66438 2.68740 -0.83922  
 C 0.49222 1.56964 0.68329  
 C 0.61199 -0.78076 0.18347  
 C 1.65291 1.82873 -0.21020  
 H -0.01238 2.38460 1.18957  
 C 2.09189 -0.62125 -0.03847  
 H 0.07941 -0.86781 -0.77160  
 H 0.38828 -1.66795 0.77924  
 C 2.60481 0.65965 -0.25127

H 2.14977 2.74941 0.10293  
H 1.23269 2.02278 -1.21026  
C 3.97130 0.83032 -0.47799  
C 2.94102 -1.72881 -0.05732  
C 4.30240 -1.55721 -0.30028  
C 4.81756 -0.27664 -0.51034  
H 2.53479 -2.72168 0.11809  
H 4.96190 -2.41956 -0.31646  
H 4.36912 1.83052 -0.62907  
H 5.87940 -0.13981 -0.69151  
H -1.02548 -0.65521 2.34709  
H -1.40495 1.08588 2.19638  
H -4.26280 -2.80344 -0.29527  
H -4.14478 1.21955 -1.84324

|  |                                       |                     |
|--|---------------------------------------|---------------------|
|  | SCF energy:                           | -728.542788 hartree |
|  | zero-point correction:                | +0.286424 hartree   |
|  | enthalpy correction:                  | +0.301644 hartree   |
|  | free energy correction:               | +0.244199 hartree   |
|  | quasiharmonic free energy correction: | +0.246846 hartree   |

## 7.8 Zwitterion 7h

C -2.22757 1.15020 0.10883  
C -3.17216 1.50801 -0.91455  
C -4.13347 0.62657 -1.37555  
H -4.82678 0.95793 -2.14639  
C -4.23131 -0.68233 -0.87054  
C -3.31902 -1.07062 0.11055  
H -3.35894 -2.08128 0.51628  
C -2.34910 -0.19826 0.60351  
C -1.35341 -0.66644 1.61822  
N -0.01497 -0.73222 0.98215  
N -1.28187 1.96468 0.60166  
H -1.35588 2.86595 0.12644  
C 0.16551 -1.68799 -0.12944  
C 0.84885 0.20721 1.17836  
C 1.63046 -2.06653 -0.27265  
H -0.20895 -1.20638 -1.04024  
H -0.45499 -2.55970 0.08516  
C 2.09058 0.28031 0.42795  
H 0.62696 0.94003 1.94548  
C 2.49506 -0.83406 -0.32800  
H 1.75678 -2.67071 -1.17421  
H 1.93784 -2.68121 0.58370  
C 3.69395 -0.76431 -1.03216  
C 2.87513 1.43866 0.48983  
C 4.06430 1.49821 -0.22761  
C 4.46876 0.39652 -0.98626  
H 2.53988 2.28230 1.08739  
H 4.67525 2.39444 -0.19723  
H 4.02319 -1.61792 -1.61837  
H 5.39854 0.44109 -1.54576

H -1.58904 -1.66933 1.98323  
H -1.25758 0.02045 2.46405  
H -4.99054 -1.36815 -1.23193  
H -3.11715 2.51445 -1.32718

SCF energy: -728.548640 hartree  
zero-point correction: +0.287054 hartree  
enthalpy correction: +0.302129 hartree  
free energy correction: +0.245240 hartree  
quasiharmonic free energy correction: +0.247531 hartree

## 7.9 Zwitterion 7i

C 0.60707 0.86521 -0.51111  
C 2.00071 1.14177 -0.28497  
Br 2.56480 2.95509 -0.33911  
C 2.95794 0.17538 -0.04702  
H 3.99331 0.46214 0.10677  
C 2.58106 -1.16630 -0.00141  
Br 3.88902 -2.49997 0.33263  
C 1.25148 -1.51912 -0.19694  
H 0.95037 -2.56293 -0.16337  
C 0.29399 -0.54436 -0.44867  
C -1.10822 -0.96161 -0.74911  
N -2.12297 -0.46423 0.23664  
N -0.36365 1.74572 -0.72928  
C -1.76548 0.12970 1.32182  
C -3.93026 1.30222 1.47713  
C -3.51503 -0.58212 -0.11880  
C -4.43343 0.28517 0.48824  
C -5.77665 0.17566 0.13416  
C -3.92049 -1.54187 -1.04490  
C -5.26931 -1.63382 -1.38067  
C -6.19710 -0.77432 -0.79581  
H -3.20820 -2.21856 -1.50197  
H -5.58931 -2.38125 -2.09928  
H -6.49643 0.84530 0.59708  
H -7.24792 -0.84538 -1.05906  
C -2.75857 0.71448 2.25768  
H -4.73083 1.60086 2.15685  
H -3.59632 2.19908 0.93998  
H -3.09566 -0.09759 2.92028  
H -2.25981 1.45889 2.87998  
H 0.03223 2.68420 -0.75461  
H -1.43898 -0.55078 -1.70848  
H -1.19428 -2.04995 -0.77385  
H -0.70165 0.15971 1.53716

SCF energy: -5870.962350 hartree  
zero-point correction: +0.267906 hartree  
enthalpy correction: +0.285752 hartree  
free energy correction: +0.220189 hartree  
quasiharmonic free energy correction: +0.223820 hartree

## 8 Cartesian Coordinates and Energies of Transition States TS-3

### 8.1 Transition State *cis-3a*

C -0.20209 0.90073 0.41829  
C 1.11350 1.20497 0.00612  
C 2.09105 0.23881 -0.16429  
H 3.09053 0.52397 -0.47473  
C 1.77571 -1.09410 0.07968  
C 0.49401 -1.45551 0.46522  
H 0.23875 -2.49642 0.64120  
C -0.49124 -0.47711 0.59533  
C -1.85555 -0.96400 0.88093  
N -2.83161 -0.84031 0.04033  
N -1.17389 1.82381 0.65197  
H -0.86718 2.78708 0.70255  
H -1.84310 1.47854 1.41759  
C -4.15613 -1.46177 0.28222  
C -2.83158 -0.04221 -1.20103  
C -4.06101 -0.56411 -1.93825  
H -1.88668 -0.18418 -1.73019  
H -2.93701 1.01408 -0.93407  
C -5.04365 -0.84371 -0.79611  
H -3.81801 -1.49136 -2.46804  
H -4.43649 0.16329 -2.66007  
H -4.47220 -1.24243 1.30344  
H -4.05256 -2.54363 0.15536  
H -5.85792 -1.51241 -1.08065  
H -5.47304 0.09548 -0.43329  
O -2.52726 0.53581 2.46348  
H -1.98506 -1.70105 1.66715  
H -1.98425 0.52484 3.26345  
Br 1.56514 3.01348 -0.31027  
Br 3.10751 -2.42031 -0.13809

|                                       |                      |
|---------------------------------------|----------------------|
| SCF energy:                           | -5755.695827 hartree |
| zero-point correction:                | +0.238687 hartree    |
| enthalpy correction:                  | +0.255163 hartree    |
| free energy correction:               | +0.194201 hartree    |
| quasiharmonic free energy correction: | +0.195793 hartree    |

### 8.2 Transition State *trans-3a*

C -0.57964 -1.30718 -0.15574  
C -1.85954 -0.71977 -0.03415  
C -2.05449 0.64711 0.02196  
H -3.05642 1.05133 0.12098  
C -0.94905 1.49224 -0.05568  
C 0.32615 0.97601 -0.20019

```

H 1.16706 1.64814 -0.32304
C 0.52159 -0.40882 -0.25029
C 1.83430 -0.96427 -0.60167
N 2.97049 -0.35017 -0.42911
N -0.35397 -2.64305 -0.20642
H -1.14341 -3.24047 0.00265
H 0.59938 -2.89082 0.22292
C 4.21633 -0.92996 -0.98883
C 3.27793 0.62144 0.64247
C 4.70780 0.25378 1.03026
H 2.55005 0.52200 1.45059
H 3.23972 1.63884 0.24042
C 5.32876 -0.12932 -0.31620
H 4.70019 -0.60903 1.70490
H 5.21856 1.08287 1.52356
H 4.20441 -0.84668 -2.07717
H 4.24795 -1.98632 -0.70406
H 6.24338 -0.71674 -0.21772
H 5.55371 0.77118 -0.89678
O 2.01421 -2.68660 0.79904
H 1.84119 -1.77075 -1.33102
H 1.93536 -2.28606 1.67588
Br -3.36969 -1.85400 0.05619
Br -1.21178 3.36515 0.00417

```

|  |                                       |                      |
|--|---------------------------------------|----------------------|
|  | SCF energy:                           | -5755.697042 hartree |
|  | zero-point correction:                | +0.238830 hartree    |
|  | enthalpy correction:                  | +0.255244 hartree    |
|  | free energy correction:               | +0.194251 hartree    |
|  | quasiharmonic free energy correction: | +0.195934 hartree    |

### 8.3 Transition State *cis-3b*

```

C -1.51944 0.55924 0.64602
C -2.80149 0.19336 1.10230
H -3.18103 0.65372 2.01102
C -3.57914 -0.71270 0.39556
H -4.56569 -0.97058 0.77094
C -3.12036 -1.27414 -0.80242
H -3.73947 -1.96563 -1.36395
C -1.85451 -0.93060 -1.26058
H -1.47234 -1.36001 -2.18372
C -1.03402 -0.05962 -0.53029
C 0.33407 0.13809 -1.03553
N 1.39616 -0.19805 -0.37187
N -0.74624 1.49457 1.29408
H -1.25016 2.06077 1.96657
H -0.16124 2.03016 0.61408
C 2.74850 -0.12209 -0.97420
C 1.46122 -0.63530 1.03439
C 2.84138 -1.27925 1.12268
H 0.62666 -1.30662 1.24861
H 1.38260 0.24481 1.68016

```

C 3.68362 -0.38718 0.20417  
H 2.80628 -2.30275 0.73415  
H 3.20836 -1.30727 2.15020  
H 2.87972 0.85752 -1.43738  
H 2.82597 -0.90016 -1.73999  
H 4.61578 -0.85496 -0.11745  
H 3.92158 0.55289 0.71202  
O 0.53248 2.42360 -0.92007  
H 0.47061 0.28649 -2.10244  
H -0.13587 2.87841 -1.45030

|  |                                       |                     |
|--|---------------------------------------|---------------------|
|  | SCF energy:                           | -613.281014 hartree |
|  | zero-point correction:                | +0.257883 hartree   |
|  | enthalpy correction:                  | +0.272023 hartree   |
|  | free energy correction:               | +0.218355 hartree   |
|  | quasiharmonic free energy correction: | +0.219320 hartree   |

#### 8.4 Transition State *trans-3b*

C 2.09808 0.78000 -0.11158  
C 3.38127 0.21332 0.03574  
H 4.23721 0.87819 0.11703  
C 3.54930 -1.16008 0.08609  
H 4.54903 -1.56964 0.20189  
C 2.44782 -2.02265 -0.01048  
H 2.58441 -3.09844 0.01489  
C 1.17993 -1.48281 -0.16280  
H 0.33531 -2.15133 -0.28928  
C 0.98009 -0.09157 -0.21451  
C -0.31890 0.48748 -0.55806  
N -1.46930 -0.12091 -0.44268  
N 1.90657 2.13566 -0.17182  
H 2.71563 2.69194 0.07737  
H 0.99875 2.41408 0.27115  
C -2.69402 0.50433 -0.99775  
C -1.81307 -1.13030 0.58061  
C -3.24575 -0.75891 0.95523  
H -1.10131 -1.07333 1.40707  
H -1.77920 -2.13186 0.14014  
C -3.83261 -0.30847 -0.38574  
H -3.24027 0.07419 1.66647  
H -3.77890 -1.60058 1.40168  
H -2.66341 0.47312 -2.08869  
H -2.71845 1.54665 -0.66416  
H -4.74135 0.28711 -0.28101  
H -4.05733 -1.17965 -1.00995  
O -0.51366 2.14162 0.93729  
H -0.31013 1.33255 -1.24215  
H -0.37432 1.68861 1.78025



```
SCF energy: -613.283151 hartree
zero-point correction: +0.258231 hartree
enthalpy correction: +0.272226 hartree
free energy correction: +0.218920 hartree
quasiharmonic free energy correction: +0.219888 hartree
```

### 8.5 Transition State *cis-3c*

```
C 0.03647 0.80998 0.40011
C -1.26663 1.22364 0.05175
Br -1.59553 3.07212 -0.16812
C -2.31675 0.33773 -0.12829
H -3.30303 0.70660 -0.38906
C -2.08770 -1.02309 0.03987
Br -3.51656 -2.24315 -0.18699
C -0.82162 -1.49032 0.36143
H -0.63638 -2.55390 0.48162
C 0.23263 -0.59021 0.50280
C 1.56304 -1.19463 0.73997
N 2.52829 -1.17793 -0.12182
N 1.08400 1.65280 0.61268
H 0.84663 2.63137 0.71746
H 1.75919 1.24218 1.33572
C 3.74780 -1.98489 0.13450
C 2.56785 -0.36666 -1.34773
C 3.68649 0.68343 -1.26160
H 1.59098 0.08453 -1.51380
H 2.76173 -1.07151 -2.16216
C 4.96684 -1.35538 -0.54021
H 3.55916 -2.99963 -0.22924
H 3.88395 -2.01547 1.21851
O 2.30524 0.25726 2.43070
H 1.64933 -1.92033 1.54278
H 3.23919 0.02201 2.35322
C 4.87791 0.16586 -0.43670
H 5.02442 -1.65825 -1.59171
H 5.86134 -1.74077 -0.04350
H 5.80553 0.63565 -0.77407
H 4.74494 0.43868 0.61798
H 3.29093 1.60333 -0.82540
H 3.99946 0.90666 -2.28656
```

```
SCF energy: -5794.989438 hartree
zero-point correction: +0.267958 hartree
enthalpy correction: +0.285641 hartree
free energy correction: +0.221620 hartree
quasiharmonic free energy correction: +0.224240 hartree
```

### 8.6 Transition State *trans-3c*

```
C 0.97946 -1.31001 -0.09388
C 2.15040 -0.51830 -0.05627
```

```

Br 3.82968 -1.38801 -0.09140
C 2.12326 0.86240 -0.00692
H 3.04917 1.42689 0.02267
C 0.89175 1.51375 -0.00689
Br 0.84199 3.40454 0.02309
C -0.28709 0.79296 -0.06516
H -1.23401 1.31612 -0.13576
C -0.25692 -0.60538 -0.09941
C -1.48812 -1.36380 -0.35935
N -2.69297 -0.96532 -0.06667
N 0.97947 -2.66457 -0.15897
H 1.87102 -3.11919 -0.00909
H 0.11374 -3.07858 0.32285
C -3.84725 -1.69560 -0.63377
C -3.04952 -0.09617 1.06400
C -3.92813 1.06580 0.58149
H -2.14884 0.23081 1.58096
H -3.60885 -0.73577 1.75657
C -5.12435 -0.85633 -0.50758
H -3.93946 -2.65024 -0.10218
H -3.61719 -1.89518 -1.68272
O -1.21411 -3.06396 1.09597
H -1.42192 -2.13298 -1.12652
H -1.89186 -3.65226 0.73790
C -4.78551 0.63057 -0.62053
H -5.61545 -1.05048 0.45258
H -5.81791 -1.16874 -1.29256
H -5.69590 1.23342 -0.67461
H -4.23299 0.79915 -1.55330
H -3.31181 1.93047 0.31476
H -4.56672 1.36953 1.41695

```

|                           |             |                      |
|---------------------------|-------------|----------------------|
|                           | SCF energy: | -5794.990802 hartree |
| zero-point                | correction: | +0.268655 hartree    |
| enthalpy                  | correction: | +0.285954 hartree    |
| free energy               | correction: | +0.223067 hartree    |
| quasiharmonic free energy | correction: | +0.225094 hartree    |

## 8.7 Transition State *cis*-3d

```

C -0.16656 1.06131 0.45487
C -1.49002 1.09974 -0.03810
Br -2.23494 2.77865 -0.48243
C -2.26455 -0.03579 -0.20101
H -3.27894 0.04617 -0.57691
C -1.73052 -1.27677 0.13576
Br -2.79218 -2.82968 -0.06631
C -0.43011 -1.37977 0.60289
H -0.00062 -2.34638 0.84969
C 0.35519 -0.23186 0.71915
C 1.76232 -0.44950 1.09920
N 2.75673 -0.18963 0.30760
N 0.60588 2.15442 0.68776

```

```

H 0.13166 3.04847 0.66112
H 1.29069 1.97317 1.50360
C 4.13203 -0.51778 0.69190
C 2.63468 0.52804 -0.97306
C 3.87022 0.22588 -1.81846
H 2.53687 1.60127 -0.78104
H 1.72922 0.17109 -1.47007
C 4.74757 -1.42478 -0.38116
H 4.12813 -1.01019 1.66436
H 4.67842 0.42540 0.78468
O 2.09155 1.25678 2.60973
H 1.97234 -1.09833 1.94252
H 1.53911 1.21828 3.40228
O 4.21517 -1.14299 -1.67502
H 4.51396 -2.47227 -0.17825
H 5.83645 -1.29194 -0.38238
H 4.71776 0.86504 -1.53991
H 3.64062 0.40007 -2.87069

```

```

SCF energy: -5830.876548 hartree
zero-point correction: +0.244144 hartree
enthalpy correction: +0.261544 hartree
free energy correction: +0.197967 hartree
quasiharmonic free energy correction: +0.200430 hartree

```

## 8.8 Transition State *trans-3d*

```

C -0.62506 -1.29366 0.18306
C -1.96514 -0.87146 0.00858
Br -3.31498 -2.18768 -0.13204
C -2.32899 0.45864 -0.05619
H -3.36919 0.73344 -0.19558
C -1.34412 1.43806 0.06712
Br -1.84189 3.26246 -0.00477
C -0.02153 1.08765 0.26434
H 0.71660 1.86335 0.42676
C 0.34994 -0.26189 0.32110
C 1.70079 -0.64851 0.74338
N 2.76594 0.10118 0.62596
N -0.23711 -2.58734 0.24561
H -0.93844 -3.27939 0.01499
H 0.77409 -2.71453 -0.13095
C 4.01023 -0.28084 1.29964
C 2.95237 1.11967 -0.42370
C 4.38548 1.02274 -0.95672
H 2.77660 2.12217 -0.02071
H 2.23563 0.91729 -1.22238
C 4.99137 -0.87794 0.27717
H 3.79044 -0.99882 2.09006
H 4.42080 0.62270 1.75851
O 2.15780 -2.38427 -0.58802
H 1.76267 -1.43912 1.48539
H 2.14459 -2.01812 -1.48301

```

O 4.77551 -0.33690 -1.02396  
H 4.84941 -1.95595 0.18671  
H 6.01889 -0.67245 0.60462  
H 5.08616 1.58949 -0.32988  
H 4.42171 1.43043 -1.96827

SCF energy: -5830.877372 hartree  
zero-point correction: +0.244744 hartree  
enthalpy correction: +0.261706 hartree  
free energy correction: +0.199811 hartree  
quasiharmonic free energy correction: +0.201248 hartree

## 8.9 Transition State *cis-3e*

C 0.96583 -1.12814 0.52788  
C 2.13103 -1.04683 -0.26536  
Br 2.75452 -2.61696 -1.11096  
C 2.84221 0.12856 -0.43946  
H 3.74025 0.13678 -1.04809  
C 2.39515 1.28938 0.18431  
Br 3.36635 2.89847 -0.03383  
C 1.23818 1.27879 0.94734  
H 0.87333 2.18726 1.41745  
C 0.51148 0.09626 1.08239  
C -0.77475 0.20383 1.79663  
N -1.92865 0.01497 1.23519  
N 0.27178 -2.27147 0.77257  
H 0.73818 -3.13177 0.51255  
H -0.18020 -2.23504 1.75033  
C -2.09108 -0.53760 -0.12420  
C -3.15090 0.28016 2.03799  
C -4.47930 0.13834 -0.04878  
C -3.29811 0.05924 -0.79609  
C -3.26956 0.48897 -2.12148  
C -5.63251 0.65513 -0.63762  
C -5.60978 1.07371 -1.96954  
C -4.43084 0.99096 -2.71113  
H -6.54791 0.72860 -0.05567  
H -6.51134 1.47193 -2.42581  
H -2.34430 0.43072 -2.68935  
H -4.41280 1.32422 -3.74439  
O -0.53466 -1.69640 3.15891  
H -0.78612 0.71739 2.75293  
H -1.45908 -1.83697 3.40223  
H -2.19424 -1.62568 -0.02771  
H -1.18464 -0.33250 -0.69454  
C -4.38817 -0.32227 1.38039  
H -2.98851 -0.14030 3.03285  
H -3.25855 1.36539 2.12305  
H -5.26745 -0.01966 1.95415  
H -4.32514 -1.41734 1.42227

```
SCF energy: -5947.374446 hartree
zero-point correction: +0.291255 hartree
enthalpy correction: +0.311027 hartree
free energy correction: +0.242055 hartree
quasiharmonic free energy correction: +0.245643 hartree
```

## 8.10 Transition State *trans-3e*

```
C 1.54452 -1.31398 -0.24398
C 2.80133 -0.75752 0.08986
Br 4.24335 -1.92959 0.43993
C 3.01882 0.60411 0.17404
H 3.99925 0.98506 0.43985
C 1.96563 1.47786 -0.09242
Br 2.26584 3.34338 -0.00506
C 0.72005 0.99336 -0.44644
H -0.07032 1.68457 -0.71568
C 0.49767 -0.38735 -0.51409
C -0.74523 -0.90824 -1.08877
N -1.89501 -0.29224 -1.09595
N 1.29978 -2.64256 -0.34266
H 2.03137 -3.25752 -0.01026
H 0.28093 -2.87452 -0.08046
C -2.29661 0.66351 -0.04109
C -2.94548 -0.82283 -1.99916
C -4.66941 0.04049 -0.45407
C -3.67192 0.33679 0.48193
C -3.96824 0.36805 1.84338
C -5.96674 -0.22445 -0.01770
C -6.26956 -0.17752 1.34439
C -5.27179 0.11705 2.27420
H -6.73905 -0.46659 -0.74350
H -7.28251 -0.37984 1.67999
H -3.18320 0.58819 2.56237
H -5.50558 0.14311 3.33434
O -1.14840 -2.59574 0.38025
H -0.63520 -1.70279 -1.82448
H -1.84496 -3.04122 -0.11947
H -2.29082 1.67518 -0.46492
H -1.56236 0.61778 0.76405
C -4.23107 -0.01065 -1.89139
H -2.55196 -0.80132 -3.01710
H -3.13690 -1.86293 -1.71209
H -4.99188 -0.47592 -2.52274
H -4.05680 1.00341 -2.27416
```

```
SCF energy: -5947.374883 hartree
zero-point correction: +0.291875 hartree
enthalpy correction: +0.311433 hartree
free energy correction: +0.243159 hartree
quasiharmonic free energy correction: +0.246239 hartree
```

### 8.11 Transition State *cis-3f*

C -0.77402 0.84072 0.48663  
C -2.06366 1.25275 0.08330  
Br -2.38476 3.10090 -0.14650  
C -3.10411 0.36758 -0.14164  
H -4.07891 0.73676 -0.44215  
C -2.88165 -0.99457 0.03285  
Br -4.29853 -2.21455 -0.25835  
C -1.63082 -1.46119 0.40523  
H -1.44942 -2.52502 0.52834  
C -0.58206 -0.56078 0.59277  
C 0.73545 -1.16940 0.87691  
N 1.70562 -1.16735 0.01634  
N 0.25365 1.68919 0.75853  
H 0.00467 2.66515 0.86182  
H 0.91811 1.26624 1.49506  
C 1.67258 -0.36012 -1.22641  
C 2.95841 -1.88824 0.33506  
C 2.96321 -0.53434 -2.02677  
H 1.55343 0.68812 -0.93766  
H 0.79932 -0.67155 -1.80581  
C 4.13549 -0.98338 0.09230  
H 3.00827 -2.76635 -0.31977  
H 2.90739 -2.22481 1.37090  
C 4.15315 -0.30587 -1.13372  
H 2.94761 0.17299 -2.85926  
H 3.00079 -1.54524 -2.45203  
C 5.22013 0.53890 -1.43565  
C 5.17008 -0.81902 1.01045  
C 6.24224 0.01861 0.69701  
C 6.26639 0.69429 -0.52354  
H 5.13885 -1.34270 1.96274  
H 7.05283 0.14879 1.40759  
H 5.23307 1.07474 -2.38136  
H 7.09799 1.35042 -0.76336  
O 1.49244 0.27996 2.52985  
H 0.80369 -1.88163 1.69168  
H 2.43819 0.12349 2.40124

SCF energy: -5947.374273 hartree  
zero-point correction: +0.291342 hartree  
enthalpy correction: +0.311058 hartree  
free energy correction: +0.240551 hartree  
quasiharmonic free energy correction: +0.245916 hartree

### 8.12 Transition State *trans-3f*

C 1.76141 -1.28494 -0.10503  
C 2.99606 -0.59555 -0.08737  
Br 4.59605 -1.60303 -0.09019  
C 3.08454 0.78261 -0.06704  
H 4.05440 1.26817 -0.04779

C 1.91232 1.53625 -0.07865  
 Br 2.02958 3.42414 -0.06908  
 C 0.67553 0.91984 -0.12108  
 H -0.21969 1.52503 -0.19637  
 C 0.58775 -0.47767 -0.13167  
 C -0.69046 -1.14679 -0.38972  
 N -1.87221 -0.65636 -0.13290  
 N 1.64207 -2.63467 -0.12393  
 H 2.49200 -3.16193 0.03071  
 H 0.74863 -2.95151 0.38643  
 C -2.12060 0.29922 0.96650  
 C -3.03324 -1.39115 -0.69546  
 C -3.41461 -0.05919 1.69541  
 H -2.21032 1.30965 0.55624  
 H -1.26543 0.25993 1.64386  
 C -4.32592 -0.64462 -0.51842  
 H -3.08847 -2.35350 -0.16817  
 H -2.83323 -1.58774 -1.74988  
 C -4.55286 -0.01947 0.71389  
 H -3.56672 0.65557 2.50808  
 H -3.31505 -1.05830 2.13960  
 C -5.76144 0.63804 0.94034  
 C -5.30111 -0.61399 -1.51403  
 C -6.51539 0.03173 -1.27673  
 C -6.74503 0.65602 -0.05027  
 H -5.11346 -1.09615 -2.47020  
 H -7.27676 0.05369 -2.05075  
 H -5.93159 1.13661 1.89142  
 H -7.68669 1.16569 0.13208  
 O -0.56035 -2.79028 1.16813  
 H -0.66514 -1.95960 -1.11272  
 H -1.26765 -3.36696 0.85083

|  |                                       |                      |
|--|---------------------------------------|----------------------|
|  | SCF energy:                           | -5947.375476 hartree |
|  | zero-point correction:                | +0.291793 hartree    |
|  | enthalpy correction:                  | +0.311410 hartree    |
|  | free energy correction:               | +0.242769 hartree    |
|  | quasiharmonic free energy correction: | +0.246095 hartree    |

### 8.13 Transition State *cis-3g*

C -2.59921 -0.14953 -0.80200  
 C -3.57233 -1.15227 -0.98337  
 C -4.08406 -1.85352 0.09883  
 H -4.83863 -2.61628 -0.07252  
 C -3.66328 -1.57124 1.40444  
 C -2.69783 -0.59210 1.59946  
 H -2.35018 -0.35778 2.60291  
 C -2.12791 0.08371 0.51117  
 C -1.04161 1.02439 0.81976  
 N 0.17958 0.91966 0.38861  
 N -2.10522 0.59771 -1.84686  
 H -2.64993 0.52857 -2.69869

```

H -1.90278 1.57488 -1.53886
C 0.60338 -0.05658 -0.63288
C 1.18489 1.88834 0.89646
C 2.96223 0.42654 -0.02333
C 2.00220 -0.53830 -0.35190
C 2.35655 -1.88303 -0.44423
C 4.27872 0.03534 0.21617
C 4.63794 -1.30997 0.11213
C 3.67911 -2.26824 -0.21807
H 5.02200 0.78291 0.48185
H 5.66552 -1.61032 0.29524
H 1.60203 -2.62504 -0.69308
H 3.95785 -3.31521 -0.29148
O -1.88403 2.86965 -0.40190
H -1.18446 1.69984 1.65784
H -1.11518 3.45428 -0.39472
H 0.54917 0.43852 -1.61043
H -0.10610 -0.88438 -0.63494
C 2.46711 1.84335 0.07172
H 0.73287 2.88206 0.86314
H 1.39649 1.62883 1.93803
H 3.20752 2.49393 0.54333
H 2.26700 2.24056 -0.93190
H -4.08327 -2.10509 2.25019
H -3.93363 -1.35047 -1.98925

```

|                                       |                     |
|---------------------------------------|---------------------|
| SCF energy:                           | -804.959589 hartree |
| zero-point correction:                | +0.311282 hartree   |
| enthalpy correction:                  | +0.328384 hartree   |
| free energy correction:               | +0.267841 hartree   |
| quasiharmonic free energy correction: | +0.269742 hartree   |

## 8.14 Transition State *trans*-3g

```

C 3.22953 -0.53341 0.55615
C 4.42610 0.21476 0.57893
C 4.54894 1.37989 -0.15753
H 5.48201 1.93554 -0.12148
C 3.48844 1.84685 -0.94874
C 2.30646 1.12486 -0.98408
H 1.50485 1.45680 -1.63615
C 2.15148 -0.05912 -0.23860
C 0.99493 -0.93099 -0.42212
N -0.18435 -0.56467 -0.85181
N 3.09531 -1.70302 1.25430
H 3.83642 -1.89200 1.91833
H 2.11600 -1.85028 1.59560
C -0.73264 0.78654 -0.61164
C -1.11939 -1.63567 -1.27217
C -3.01726 -0.19732 -0.61188
C -2.12074 0.70584 -0.02848
C -2.52830 1.52319 1.02440
C -4.32457 -0.27709 -0.13336

```



```

C -4.73852 0.55137 0.91147
C -3.84187 1.45002 1.49061
H -5.01809 -0.98665 -0.57796
H -5.75879 0.48929 1.27867
H -1.82149 2.21351 1.47808
H -4.16131 2.08729 2.30976
O 0.52650 -1.40925 1.76256
H 1.20430 -1.99580 -0.50462
H -0.18699 -2.04293 1.61346
H -0.76106 1.32987 -1.56414
H -0.06309 1.31285 0.06906
C -2.46148 -1.05990 -1.71119
H -0.64833 -2.19270 -2.08433
H -1.26540 -2.30805 -0.41896
H -3.13597 -1.88617 -1.94867
H -2.32379 -0.47015 -2.62704
H 3.59505 2.75062 -1.53901
H 5.25029 -0.14217 1.19093

```

```

SCF energy: -804.960978 hartree
zero-point correction: +0.311445 hartree
enthalpy correction: +0.328502 hartree
free energy correction: +0.267747 hartree
quasiharmonic free energy correction: +0.270047 hartree

```

## 8.15 Transition State *cis*-3h

```

C 2.52042 -0.21726 0.98423
C 3.79125 -0.78916 1.19742
C 4.78981 -0.69517 0.23956
H 5.75936 -1.14371 0.43820
C 4.56996 -0.01098 -0.96211
C 3.32163 0.55365 -1.19100
H 3.12590 1.08804 -2.11782
C 2.28500 0.42164 -0.25576
C 0.97893 0.97611 -0.65607
N -0.06779 0.24380 -0.89663
N 1.52959 -0.26494 1.93793
H 1.85745 -0.50797 2.86553
H 0.91969 0.58569 1.89059
C -0.12772 -1.20006 -0.57569
C -1.30228 0.89192 -1.39277
C -1.47810 -1.79385 -0.97640
H 0.02346 -1.31007 0.50203
H 0.69468 -1.69554 -1.09878
C -2.48457 0.42026 -0.59048
H -1.42156 0.61608 -2.44754
H -1.17275 1.97270 -1.32687
C -2.59136 -0.96326 -0.39715
H -1.52109 -2.82462 -0.61704
H -1.56007 -1.82150 -2.07054
C -3.66768 -1.47435 0.32643
C -3.44226 1.28632 -0.06762

```

C -4.52562 0.76744 0.64421  
C -4.63692 -0.60960 0.83972  
H -3.34217 2.35878 -0.21577  
H -5.27599 1.43791 1.05224  
H -3.74769 -2.54629 0.48923  
H -5.47598 -1.01149 1.40013  
O 0.39527 2.08355 1.30439  
H 0.95797 1.98589 -1.05007  
H -0.55719 2.12635 1.14280  
H 5.35790 0.07955 -1.70222  
H 3.98032 -1.29214 2.14245

SCF energy: -804.959567 hartree  
zero-point correction: +0.311228 hartree  
enthalpy correction: +0.328373 hartree  
free energy correction: +0.267547 hartree  
quasiharmonic free energy correction: +0.269759 hartree

### 8.16 Transition State *trans*-3h

C -3.47297 0.58662 -0.18436  
C -4.67537 -0.14938 -0.24191  
C -4.65902 -1.52945 -0.34273  
H -5.60004 -2.07105 -0.38561  
C -3.44586 -2.23199 -0.39225  
C -2.25505 -1.52543 -0.33808  
H -1.31928 -2.06584 -0.42968  
C -2.24192 -0.12236 -0.22945  
C -1.01017 0.64969 -0.37292  
N 0.20360 0.21058 -0.15419  
N -3.46626 1.95393 -0.10703  
H -4.36803 2.37345 0.08514  
H -2.66057 2.30457 0.46429  
C 0.50340 -0.83959 0.83995  
C 1.31445 1.08406 -0.60531  
C 1.74884 -0.46883 1.64373  
H 0.67816 -1.79013 0.32657  
H -0.36634 -0.93920 1.49177  
C 2.66057 0.42951 -0.46329  
H 1.28365 1.99323 0.01131  
H 1.12655 1.36666 -1.64248  
C 2.90923 -0.30643 0.70170  
H 1.94053 -1.25737 2.37587  
H 1.55961 0.46235 2.19378  
C 4.16432 -0.88183 0.89788  
C 3.66177 0.59284 -1.41979  
C 4.92109 0.02866 -1.21124  
C 5.17155 -0.70780 -0.05292  
H 3.45779 1.16141 -2.32382  
H 5.70159 0.15675 -1.95533  
H 4.35269 -1.46574 1.79547  
H 6.14870 -1.15435 0.10664  
O -1.27164 2.09701 1.35725

H -1.07418 1.54122 -0.99316  
H -0.56522 2.72751 1.16551  
H -3.43588 -3.31237 -0.48917  
H -5.61714 0.39159 -0.20062

SCF energy: -804.961489 hartree  
zero-point correction: +0.311689 hartree  
enthalpy correction: +0.328681 hartree  
free energy correction: +0.268287 hartree  
quasiharmonic free energy correction: +0.270286 hartree

### 8.17 Transition State *cis-3i*

C -0.99896 -1.07479 -0.42806  
C -2.35793 -0.95107 -0.05087  
Br -3.35822 -2.53095 0.22573  
C -2.98877 0.26939 0.10785  
H -4.03669 0.30821 0.38685  
C -2.26648 1.44062 -0.11050  
Br -3.12474 3.11581 0.07975  
C -0.92729 1.38614 -0.45667  
H -0.35614 2.29677 -0.61312  
C -0.28783 0.14837 -0.56456  
C 1.16381 0.22484 -0.79011  
C 1.63485 -0.87857 1.32308  
N -0.36548 -2.24712 -0.66935  
H -0.96445 -3.06159 -0.72864  
H 0.41359 -2.10715 -1.44798  
N 2.05218 -0.16508 0.08140  
C 2.78716 -1.08403 2.29308  
C 4.25980 0.34651 0.96930  
C 3.44453 0.11735 -0.14747  
C 3.94805 0.19789 -1.44664  
C 5.59682 0.67838 0.75104  
C 6.10921 0.78562 -0.54102  
C 5.28456 0.54013 -1.63797  
H 6.23870 0.85215 1.61061  
H 7.15243 1.04659 -0.69046  
H 3.31220 -0.01587 -2.29918  
H 5.67884 0.60241 -2.64721  
O 1.27480 -1.51447 -2.45751  
H 1.51299 0.88589 -1.57666  
H 2.16917 -1.86065 -2.33942  
C 3.67242 0.15957 2.34034  
H 2.35427 -1.30444 3.27232  
H 3.38999 -1.94772 1.99328  
H 4.47175 0.05492 3.07814  
H 3.06872 1.03229 2.62339  
H 1.19223 -1.82978 1.01809  
H 0.85677 -0.25928 1.77919

```
SCF energy: -5947.372340 hartree
zero-point correction: +0.290375 hartree
enthalpy correction: +0.310045 hartree
free energy correction: +0.241667 hartree
quasiharmonic free energy correction: +0.244663 hartree
```

### 8.18 Transition State *trans-3i*

```
C 1.55824 -1.29124 -0.11095
C 2.62264 -0.35699 -0.03563
Br 4.38018 -1.01185 0.20403
C 2.43128 1.00530 -0.13156
H 3.27752 1.68075 -0.06182
C 1.13820 1.49986 -0.32180
Br 0.87345 3.36610 -0.48394
C 0.06378 0.64103 -0.42325
H -0.92693 1.03449 -0.62200
C 0.26068 -0.74338 -0.31778
C -0.82466 -1.67060 -0.62659
C -3.04798 -2.32561 -1.24453
N 1.70771 -2.63024 -0.01347
H 2.62870 -2.95827 0.24876
H 0.82748 -3.10891 0.43058
N -2.10490 -1.42495 -0.51824
C -4.44226 -1.71081 -1.37327
C -3.77781 0.25075 -0.08336
C -2.66231 -0.45607 0.37726
C -2.12226 -0.24354 1.64471
C -4.32668 1.22889 0.74635
C -3.76857 1.49129 1.99722
C -2.67542 0.74837 2.44949
H -5.19742 1.78371 0.40707
H -4.19902 2.26212 2.62930
H -1.28030 -0.83859 1.98452
H -2.25930 0.93279 3.43493
O -0.50492 -3.27064 1.04279
H -0.56793 -2.51713 -1.25874
H -1.02051 -3.98035 0.63765
C -4.36146 -0.17865 -1.40069
H -4.90171 -2.09974 -2.28551
H -5.06996 -2.01395 -0.53009
H -5.34907 0.26597 -1.54356
H -3.72282 0.14470 -2.23363
H -3.07685 -3.27663 -0.70393
H -2.61155 -2.48988 -2.23083
```

```
SCF energy: -5947.374382 hartree
zero-point correction: +0.290332 hartree
enthalpy correction: +0.310222 hartree
free energy correction: +0.240745 hartree
quasiharmonic free energy correction: +0.244540 hartree
```

## 9 Cartesian Coordinates and Energies of Transition States TS-5

### 9.1 Transition State 5a

C -0.44628 0.64349 -0.40793  
C 0.82635 1.20529 -0.08669  
C 1.96320 0.45093 0.07858  
H 2.91900 0.92730 0.26696  
C 1.86606 -0.94820 -0.01635  
C 0.65715 -1.56013 -0.23191  
H 0.58078 -2.64258 -0.27748  
C -0.52013 -0.78860 -0.37147  
C -1.75327 -1.50181 -0.55336  
N -2.94053 -1.09515 -0.15229  
N -1.52989 1.35896 -0.78751  
H -1.38176 2.36171 -0.68766  
C -4.18060 -1.78379 -0.59762  
C -3.23325 0.02956 0.63107  
C -4.74283 0.07426 0.80454  
H -2.52023 0.98300 -0.15561  
H -2.59938 0.08558 1.51954  
C -5.19775 -1.35381 0.45032  
H -5.19794 0.79305 0.11166  
H -5.03041 0.36614 1.81761  
H -3.99027 -2.85710 -0.64964  
H -4.43490 -1.41185 -1.59541  
H -6.21998 -1.40250 0.06922  
H -5.11774 -2.00248 1.32835  
H -1.72527 -2.49343 -0.99733  
Br 0.97615 3.08935 0.04124  
Br 3.44039 -1.98526 0.17686

|                                       |                      |
|---------------------------------------|----------------------|
| SCF energy:                           | -5679.263909 hartree |
| zero-point correction:                | +0.210104 hartree    |
| enthalpy correction:                  | +0.224033 hartree    |
| free energy correction:               | +0.168525 hartree    |
| quasiharmonic free energy correction: | +0.169511 hartree    |

### 9.2 Transition State 5b

C 1.33563 0.81102 -0.32587  
C 2.64998 1.23137 0.03453  
C 3.63198 0.32232 0.35763  
H 4.63488 0.67371 0.58521  
C 3.35168 -1.06476 0.37957  
C 2.06914 -1.49242 0.11921  
H 1.82780 -2.55264 0.16113  
C 1.02082 -0.57920 -0.17377  
C -0.29555 -1.11279 -0.36984

N -1.42790 -0.48725 -0.11581  
 N 0.41601 1.66082 -0.85580  
 H 0.74347 2.62636 -0.81647  
 C -2.73252 -1.03702 -0.56596  
 C -1.58662 0.75998 0.51967  
 C -3.08169 1.03916 0.56605  
 H -0.66725 1.50812 -0.28170  
 H -1.02986 0.79832 1.46065  
 C -3.72502 -0.34377 0.35692  
 H -3.38358 1.71378 -0.24549  
 H -3.38399 1.50384 1.50788  
 H -2.70715 -2.12549 -0.48899  
 H -2.88265 -0.75402 -1.61317  
 H -4.72560 -0.29926 -0.07898  
 H -3.77926 -0.88143 1.30933  
 H -0.40002 -2.14574 -0.69444  
 H 4.13422 -1.77873 0.61574  
 H 2.87530 2.29496 -0.00812

|                           |             |                     |
|---------------------------|-------------|---------------------|
|                           | SCF energy: | -536.847217 hartree |
| zero-point                | correction: | +0.229007 hartree   |
| enthalpy                  | correction: | +0.240260 hartree   |
| free energy               | correction: | +0.193155 hartree   |
| quasiharmonic free energy | correction: | +0.193403 hartree   |

### 9.3 Transition State 5c

C -0.14589 0.68954 -0.40509  
 C 1.15092 1.20025 -0.10144  
 C 2.25366 0.39909 0.07430  
 C 2.08973 -0.99560 0.00596  
 C 0.85420 -1.55643 -0.19358  
 H 0.73146 -2.63521 -0.22081  
 C -0.29005 -0.73601 -0.34261  
 C -1.54620 -1.40868 -0.51912  
 N -2.74917 -0.98526 -0.15835  
 H -1.51819 -2.42128 -0.91376  
 N -1.20459 1.43868 -0.78413  
 H -1.03056 2.43706 -0.67914  
 H -2.18439 1.06128 -0.13656  
 C -3.88425 -1.86964 -0.55549  
 C -2.94097 0.15141 0.64037  
 C -4.35353 0.63122 0.92365  
 H -2.25462 0.13639 1.49072  
 C -5.22807 -1.16692 -0.52315  
 H -3.88587 -2.69921 0.16064  
 H -3.66250 -2.26185 -1.54858  
 H 3.23202 0.83332 0.24868  
 Br 1.38368 3.07769 -0.01759  
 Br 3.61559 -2.10129 0.20802  
 H -5.99775 -1.92550 -0.69551  
 H -5.29347 -0.43793 -1.34076  
 H -4.62527 1.42860 0.21647

H -4.35958 1.08738 1.91806  
C -5.41451 -0.46106 0.81497  
H -6.41633 -0.02646 0.88974  
H -5.30348 -1.18758 1.63083

SCF energy: -5718.556823 hartree  
zero-point correction: +0.239356 hartree  
enthalpy correction: +0.254466 hartree  
free energy correction: +0.195954 hartree  
quasiharmonic free energy correction: +0.197778 hartree

#### 9.4 Transition State 5d

C -0.14672 0.71199 -0.36441  
C 1.16405 1.20251 -0.09082  
C 2.25762 0.38461 0.06636  
C 2.07490 -1.00662 0.00274  
C 0.82825 -1.54764 -0.18315  
H 0.68945 -2.62421 -0.21417  
C -0.30541 -0.71123 -0.31623  
C -1.56397 -1.38390 -0.49528  
N -2.76695 -0.96313 -0.15378  
H -1.52857 -2.40028 -0.88060  
N -1.20071 1.48526 -0.70649  
H -1.01524 2.48026 -0.59569  
H -2.16660 1.11294 -0.09732  
C -3.89781 -1.87440 -0.47862  
C -2.98976 0.16756 0.65398  
C -4.41948 0.61832 0.79509  
H -2.39876 0.11328 1.57054  
C -5.23136 -1.15637 -0.43306  
H -3.88168 -2.66673 0.27656  
H -3.73065 -2.30643 -1.46651  
H 3.24472 0.80561 0.22361  
Br 1.42914 3.07491 -0.01473  
Br 3.58545 -2.13470 0.18654  
O -5.37106 -0.45066 0.78725  
H -6.03315 -1.89562 -0.49077  
H -5.33099 -0.45916 -1.27787  
H -4.70193 1.30485 -0.01884  
H -4.53709 1.14931 1.74166

SCF energy: -5754.445761 hartree  
zero-point correction: +0.216041 hartree  
enthalpy correction: +0.230786 hartree  
free energy correction: +0.173081 hartree  
quasiharmonic free energy correction: +0.174680 hartree

#### 9.5 Transition State 5e

C 0.57692 0.50511 -0.57849  
C 1.77684 1.20925 -0.23680

Br 1.75536 3.10047 -0.30123  
 C 2.95343 0.58105 0.08423  
 H 3.84812 1.15894 0.28919  
 C 2.98700 -0.82571 0.12828  
 Br 4.62288 -1.68446 0.54650  
 C 1.85683 -1.56352 -0.10960  
 H 1.87722 -2.64826 -0.05505  
 C 0.62984 -0.91963 -0.39899  
 C -0.50686 -1.77658 -0.58459  
 N -1.76500 -1.49680 -0.31991  
 N -0.53103 1.07014 -1.08542  
 H -0.48101 2.08771 -1.07662  
 C -2.81128 -2.46607 -0.71635  
 C -2.16518 -0.31275 0.35471  
 C -3.99220 -1.72493 -1.32498  
 H -3.12355 -3.00082 0.18721  
 H -2.36973 -3.16947 -1.42133  
 C -3.61480 -0.10410 0.52492  
 H -1.55593 0.59757 -0.43115  
 H -1.56596 -0.15944 1.25715  
 C -4.53827 -0.73785 -0.32549  
 H -4.75767 -2.45241 -1.60947  
 H -3.66475 -1.21318 -2.23938  
 C -5.89999 -0.46436 -0.20009  
 C -4.08608 0.79790 1.49059  
 C -5.44676 1.07203 1.60186  
 C -6.36140 0.44370 0.75359  
 H -3.37606 1.28563 2.15483  
 H -5.79477 1.77328 2.35504  
 H -6.60442 -0.97159 -0.85589  
 H -7.42364 0.65160 0.84041  
 H -0.32218 -2.79454 -0.91893

|                                       |                      |
|---------------------------------------|----------------------|
| SCF energy:                           | -5870.954334 hartree |
| zero-point correction:                | +0.263326 hartree    |
| enthalpy correction:                  | +0.280461 hartree    |
| free energy correction:               | +0.217294 hartree    |
| quasiharmonic free energy correction: | +0.219903 hartree    |

## 9.6 Transition State 5f

C 0.59466 0.60505 -0.23292  
 C 1.88419 1.20700 -0.12768  
 Br 2.00232 3.09670 -0.14362  
 C 3.05076 0.48290 -0.07287  
 H 4.01158 0.98486 -0.04927  
 C 2.97462 -0.92080 -0.06470  
 Br 4.58626 -1.91727 -0.02416  
 C 1.76318 -1.56477 -0.07293  
 H 1.70840 -2.64912 -0.04022  
 C 0.55938 -0.82178 -0.09552  
 C -0.66885 -1.56614 -0.06547  
 N -1.80822 -1.17407 0.48224



```

N -0.54976 1.27332 -0.50190
H -0.42111 2.28362 -0.47893
C -1.95810 -0.00679 1.24223
C -3.01634 -2.00546 0.25195
C -3.35436 0.23777 1.78225
H -1.42511 0.90739 0.28236
H -1.14563 0.09946 1.96618
C -4.18835 -1.12744 -0.09270
H -3.20951 -2.54828 1.18578
H -2.80416 -2.72137 -0.54139
C -4.37903 0.00869 0.70318
H -3.41461 1.26024 2.16464
H -3.57410 -0.43287 2.62981
C -5.45981 0.85144 0.44628
C -5.06724 -1.42215 -1.13294
C -6.15460 -0.58129 -1.37726
C -6.34905 0.55328 -0.58859
H -4.90275 -2.30333 -1.74802
H -6.84264 -0.80721 -2.18645
H -5.60524 1.74164 1.05339
H -7.19048 1.21179 -0.78413
H -0.66526 -2.57875 -0.45770

```

```

SCF energy: -5870.944405 hartree
zero-point correction: +0.263196 hartree
enthalpy correction: +0.280289 hartree
free energy correction: +0.217403 hartree
quasiharmonic free energy correction: +0.219822 hartree

```

## 9.7 Transition State 5g

```

C 2.33483 -0.73116 0.61828
C 3.49116 -1.56787 0.51240
C 4.65167 -1.11940 -0.06991
H 5.52306 -1.76851 -0.09527
C 4.73311 0.18485 -0.62115
C 3.61433 0.98284 -0.60937
H 3.64669 1.97689 -1.05048
C 2.37823 0.53253 -0.06557
C 1.26813 1.42794 -0.16609
N -0.01372 1.12265 -0.21539
N 1.26047 -1.05566 1.36557
H 1.33131 -2.01289 1.71265
C -1.01327 2.21063 -0.17970
C -0.48107 -0.21658 -0.35565
C -2.15034 1.83229 0.75813
H -1.39341 2.34728 -1.19828
H -0.51233 3.12231 0.14458
C -1.94203 -0.41139 -0.30580
H 0.18715 -0.80603 0.64900
H 0.01782 -0.70997 -1.19608
C -2.78272 0.54516 0.29235
H -2.88579 2.64209 0.76920

```

H -1.75715 1.72741 1.77779  
C -4.15086 0.29596 0.40429  
C -2.50600 -1.60414 -0.78567  
C -3.87113 -1.84745 -0.66184  
C -4.70192 -0.89811 -0.06156  
H -1.86205 -2.34413 -1.25594  
H -4.28865 -2.77677 -1.03921  
H -4.79023 1.05042 0.85783  
H -5.76798 -1.08172 0.03287  
H 1.48713 2.48756 -0.27921  
H 5.66089 0.53920 -1.05821  
H 3.44351 -2.55875 0.95879

SCF energy: -728.537791 hartree  
zero-point correction: +0.282295 hartree  
enthalpy correction: +0.296719 hartree  
free energy correction: +0.242007 hartree  
quasiharmonic free energy correction: +0.243369 hartree

## 9.8 Transition State 5h

C -2.40557 -0.80447 -0.47019  
C -3.69695 -1.40799 -0.50636  
C -4.84192 -0.66103 -0.34573  
H -5.81253 -1.14372 -0.42310  
C -4.76652 0.73074 -0.09868  
C -3.52996 1.32303 0.02714  
H -3.45317 2.38590 0.24746  
C -2.32748 0.57368 -0.08528  
C -1.08841 1.26825 0.10820  
N 0.03640 0.75489 0.58333  
N -1.27623 -1.46296 -0.84089  
H -1.46078 -2.45520 -0.99113  
C 0.14802 -0.54425 1.11360  
C 1.26231 1.58895 0.53841  
C 1.53088 -0.90578 1.62649  
H -0.39905 -1.26390 0.00831  
H -0.67136 -0.74628 1.81031  
C 2.42836 0.76861 0.05656  
H 1.44635 1.94419 1.56037  
H 1.08144 2.44648 -0.10962  
C 2.58161 -0.50087 0.62784  
H 1.57197 -1.98180 1.81682  
H 1.74563 -0.40538 2.58587  
C 3.65315 -1.30298 0.23709  
C 3.33628 1.23402 -0.89260  
C 4.41475 0.43144 -1.26961  
C 4.57155 -0.83491 -0.70524  
H 3.20164 2.21799 -1.33509  
H 5.12564 0.79137 -2.00742  
H 3.76955 -2.29377 0.66950  
H 5.40646 -1.46242 -1.00366  
H -1.06359 2.33816 -0.07953

H -5.67265 1.31801 0.00816  
H -3.75719 -2.47185 -0.72424

SCF energy: -728.527389 hartree  
zero-point correction: +0.282154 hartree  
enthalpy correction: +0.296538 hartree  
free energy correction: +0.241874 hartree  
quasiharmonic free energy correction: +0.243260 hartree

## 9.9 Transition State 5i

C 0.73205 0.87659 0.38828  
C 2.13495 1.06592 0.21150  
Br 2.83507 2.82000 0.35048  
C 3.01289 0.03102 0.00166  
H 4.07885 0.21575 -0.07287  
C 2.50213 -1.27658 -0.09832  
Br 3.71787 -2.70595 -0.36094  
C 1.15636 -1.52107 -0.02543  
H 0.76665 -2.52922 -0.13035  
C 0.24115 -0.45383 0.16483  
C -1.14507 -0.79671 0.20947  
N -2.16463 -0.01690 -0.16458  
N -0.12716 1.84074 0.78939  
C -1.97701 1.17248 -0.88482  
C -4.27883 0.85537 -1.80562  
C -3.49874 -0.42689 0.19800  
H 0.30528 2.76253 0.81742  
C -4.55858 -0.06184 -0.64509  
C -5.83875 -0.51092 -0.32121  
C -3.71647 -1.16732 1.35971  
C -5.00216 -1.61259 1.65766  
C -6.06298 -1.29361 0.81125  
H -2.89570 -1.37503 2.03875  
H -5.17300 -2.19103 2.56008  
H -6.66942 -0.23166 -0.96418  
H -7.06810 -1.63083 1.04564  
C -3.23481 1.87452 -1.34157  
H -5.20715 1.33742 -2.12628  
H -3.88456 0.28615 -2.65793  
H -3.66917 2.48179 -0.53681  
H -2.96380 2.55734 -2.15075  
H -1.21847 1.02418 -1.65757  
H -1.09847 1.82214 0.07438  
H -1.41036 -1.81547 0.47094

SCF energy: -5870.943383 hartree  
zero-point correction: +0.263133 hartree  
enthalpy correction: +0.280199 hartree  
free energy correction: +0.217450 hartree  
quasiharmonic free energy correction: +0.219715 hartree

## 10 Cartesian Coordinates and Energies of Transition States TS-6

### 10.1 Transition State 6a

```
C 0.07759 0.79427 -0.10641
C -1.25595 1.16971 -0.32486
Br -1.64496 2.96929 -0.76565
C -2.31695 0.27781 -0.21811
H -3.33478 0.61328 -0.38454
C -2.03960 -1.04034 0.10861
Br -3.46658 -2.27660 0.26230
C -0.73077 -1.46707 0.30323
H -0.52064 -2.50662 0.53654
C 0.33200 -0.57083 0.19556
C 1.72904 -1.03338 0.44310
N 2.54816 -1.07844 -0.74916
H 1.75234 -2.03242 0.88568
N 1.13082 1.68092 -0.22766
H 1.93076 1.48184 0.38068
H 0.87702 2.66098 -0.21822
C 3.94574 -1.56239 -0.61137
C 2.32176 -0.59978 -1.92179
C 3.50938 -0.69548 -2.81892
H 1.35924 -0.17000 -2.17628
H 2.41059 -0.18558 1.23713
C 4.41688 -1.68193 -2.06102
H 3.95843 0.30202 -2.91117
H 3.23102 -1.02570 -3.82211
H 3.94003 -2.50065 -0.05413
H 4.49184 -0.80717 -0.03769
H 5.47662 -1.44877 -2.16524
H 4.24423 -2.69766 -2.42508
H 1.10407 0.77111 2.70224
C 2.55073 0.39990 4.24861
C 2.14507 1.06894 2.93986
O 3.00337 0.73561 1.87865
H 2.12241 2.16214 3.08410
H 1.86993 0.67215 5.06370
H 3.56573 0.69881 4.53362
H 2.53595 -0.69048 4.13776
```

```
SCF energy: -5834.261287 hartree
zero-point correction: +0.291699 hartree
enthalpy correction: +0.311455 hartree
free energy correction: +0.241644 hartree
quasiharmonic free energy correction: +0.245541 hartree
```

## 10.2 Transition State 6b

C 1.27486 -0.73165 0.80547  
C 2.41220 -1.48917 1.12570  
H 2.74652 -1.51819 2.16029  
C 3.11800 -2.17325 0.14035  
H 4.00146 -2.74362 0.41349  
C 2.69897 -2.11684 -1.19007  
H 3.24744 -2.64214 -1.96594  
C 1.55619 -1.38484 -1.50890  
H 1.21260 -1.34338 -2.54037  
C 0.82042 -0.69431 -0.53691  
C -0.36603 0.12587 -0.91740  
N -1.62528 -0.37842 -0.42169  
H -0.46578 0.23350 -2.00094  
N 0.55938 -0.07329 1.80719  
H 0.15102 0.81481 1.50817  
H 1.08130 0.03522 2.66978  
C -2.85611 0.38511 -0.74702  
C -1.85603 -1.31126 0.43531  
C -3.29207 -1.37854 0.83588  
H -1.05324 -1.93604 0.80946  
H -0.28191 1.35787 -0.35248  
C -3.97623 -0.53011 -0.25182  
H -3.39808 -0.93905 1.83639  
H -3.65077 -2.40873 0.88846  
H -2.87149 0.58895 -1.81904  
H -2.79931 1.33333 -0.20311  
H -4.82885 0.03576 0.12421  
H -4.31595 -1.17589 -1.06553  
H 1.61878 2.27465 -0.80217  
C 1.31795 4.31909 -0.20373  
C 1.19524 2.82372 0.06142  
O -0.13558 2.43382 0.27915  
H 1.83184 2.56369 0.92816  
H 2.36349 4.60881 -0.36030  
H 0.92683 4.89047 0.64532  
H 0.74596 4.59865 -1.09533

|                                       |                     |
|---------------------------------------|---------------------|
| SCF energy:                           | -691.844827 hartree |
| zero-point correction:                | +0.310745 hartree   |
| enthalpy correction:                  | +0.327859 hartree   |
| free energy correction:               | +0.266061 hartree   |
| quasiharmonic free energy correction: | +0.268741 hartree   |

## 10.3 Transition State 6c

C -0.11975 0.74585 -0.24099  
C -1.44289 0.98838 -0.63800  
C -2.47867 0.09207 -0.40193  
C -2.18391 -1.09804 0.24502  
C -0.88216 -1.39840 0.62737  
H -0.65841 -2.34262 1.11440

C 0.15743 -0.49746 0.39179  
 C 1.53163 -0.80389 0.87727  
 N 2.52189 -1.06737 -0.16181  
 N 0.91071 1.63264 -0.50249  
 H 0.61840 2.57310 -0.73915  
 H 1.64640 1.63696 0.20909  
 C 3.83080 -1.50613 0.38853  
 C 2.34401 -0.89005 -1.42468  
 C 3.39913 -1.05701 -2.46469  
 C 4.98090 -1.22192 -0.55986  
 H 3.73337 -2.57762 0.59335  
 H 3.95286 -0.98461 1.33913  
 H -3.48941 0.32765 -0.71573  
 Br -1.85619 2.61107 -1.52164  
 Br -3.57550 -2.33778 0.58755  
 H 5.88097 -1.69018 -0.15239  
 H 5.15884 -0.14046 -0.60417  
 H 3.63235 -0.04792 -2.83425  
 H 2.94515 -1.58709 -3.30831  
 H 2.03271 0.28444 1.54012  
 H 1.53794 -1.67289 1.54116  
 H 1.35017 -0.59163 -1.74339  
 C 4.65367 -1.75446 -1.95031  
 H 5.48260 -1.58656 -2.64224  
 H 4.48059 -2.83567 -1.89673  
 O 2.40566 1.35634 2.04619  
 C 1.32496 1.79152 2.83278  
 C 1.79060 2.50768 4.09304  
 H 0.69270 0.93120 3.12493  
 H 0.66731 2.47232 2.25934  
 H 2.40520 1.84135 4.70830  
 H 0.93792 2.84357 4.69406  
 H 2.39338 3.38511 3.83403

|  |                                       |                      |
|--|---------------------------------------|----------------------|
|  | SCF energy:                           | -5873.560923 hartree |
|  | zero-point correction:                | +0.321310 hartree    |
|  | enthalpy correction:                  | +0.342051 hartree    |
|  | free energy correction:               | +0.270002 hartree    |
|  | quasiharmonic free energy correction: | +0.274408 hartree    |

#### 10.4 Transition State 6d

C -0.11394 0.75200 -0.22874  
 C -1.43804 1.00587 -0.61844  
 C -2.47829 0.11629 -0.37954  
 C -2.19091 -1.07830 0.26338  
 C -0.89006 -1.38911 0.63903  
 H -0.66992 -2.33555 1.12336  
 C 0.15385 -0.49482 0.39913  
 C 1.53071 -0.81875 0.86819  
 N 2.49229 -1.10515 -0.18751  
 N 0.92228 1.62998 -0.49306  
 H 0.63733 2.57015 -0.73924

H 1.66141 1.63245 0.21656  
 C 3.80196 -1.58280 0.31401  
 C 2.31960 -0.90995 -1.44591  
 C 3.39004 -1.12879 -2.46435  
 C 4.89202 -1.27769 -0.68941  
 H 3.70818 -2.65797 0.49047  
 H 3.98983 -1.07695 1.26280  
 H -3.48874 0.35997 -0.68824  
 Br -1.84385 2.63455 -1.49358  
 Br -3.59013 -2.30865 0.60589  
 O 4.52297 -1.79740 -1.96019  
 H 5.81994 -1.76769 -0.39242  
 H 5.06220 -0.19462 -0.76099  
 H 3.66159 -0.14554 -2.88165  
 H 2.97625 -1.73281 -3.27690  
 H 2.06360 0.24860 1.50177  
 H 1.53843 -1.68313 1.53766  
 H 1.35168 -0.56196 -1.79208  
 O 2.47445 1.33387 1.99422  
 C 1.43164 1.77649 2.82558  
 C 1.95317 2.46924 4.07723  
 H 0.79565 0.92298 3.13090  
 H 0.76404 2.47481 2.28554  
 H 2.57711 1.78538 4.66308  
 H 1.12754 2.81203 4.71136  
 H 2.56138 3.33973 3.80773

|                                       |                      |
|---------------------------------------|----------------------|
| SCF energy:                           | -5909.443866 hartree |
| zero-point correction:                | +0.297654 hartree    |
| enthalpy correction:                  | +0.318077 hartree    |
| free energy correction:               | +0.246533 hartree    |
| quasiharmonic free energy correction: | +0.250916 hartree    |

## 10.5 Transition State 6e

C 0.74782 0.47604 0.62224  
 C 1.90587 -0.04451 1.22021  
 Br 2.14546 0.15381 3.08706  
 C 2.90374 -0.68732 0.49789  
 H 3.78828 -1.06326 0.99976  
 C 2.74124 -0.82809 -0.87188  
 Br 4.09020 -1.69216 -1.88209  
 C 1.59867 -0.35597 -1.50589  
 H 1.46958 -0.48816 -2.57586  
 C 0.59732 0.28816 -0.77908  
 C -0.59210 0.84138 -1.48509  
 N -1.84885 0.17307 -1.20352  
 N -0.25585 1.08798 1.34915  
 H -0.00206 1.37160 2.28756  
 H -0.75429 1.82922 0.84598  
 C -3.00258 0.65426 -2.00413  
 C -2.04127 -0.73561 -0.30333  
 C -4.24923 0.77431 -1.14658

```

C -3.36778 -1.23782 0.01967
C -4.49533 -0.50770 -0.39555
H -5.09915 1.02086 -1.78781
H -4.12445 1.59786 -0.43100
C -5.76185 -0.97273 -0.05552
C -3.50895 -2.41186 0.76954
C -4.78141 -2.87241 1.09246
C -5.90449 -2.15158 0.68041
H -2.62374 -2.95597 1.08815
H -4.89969 -3.78622 1.66589
H -6.63987 -0.41307 -0.36694
H -6.89832 -2.50772 0.93510
H -0.46219 0.84345 -2.57090
H -0.83761 2.08210 -1.07026
O -1.07051 3.21358 -0.51690
C 0.16063 3.88741 -0.48947
C 0.00939 5.36895 -0.80894
H 0.86292 3.43697 -1.21853
H 0.64640 3.78666 0.49985
H -0.41319 5.50478 -1.81052
H 0.97674 5.88312 -0.76949
H -0.66235 5.84678 -0.08724
H -3.14318 -0.06985 -2.81441
H -2.71819 1.61491 -2.43229
H -1.17481 -1.13744 0.21301

```

|  |                                       |                      |
|--|---------------------------------------|----------------------|
|  | SCF energy:                           | -6025.947670 hartree |
|  | zero-point correction:                | +0.345108 hartree    |
|  | enthalpy correction:                  | +0.368017 hartree    |
|  | free energy correction:               | +0.290416 hartree    |
|  | quasiharmonic free energy correction: | +0.296318 hartree    |

## 10.6 Transition State 6f

```

C -1.10160 0.83040 0.29701
C -2.39855 1.17495 -0.11723
Br -2.78199 2.98062 -0.54027
C -3.42745 0.24822 -0.22215
H -4.41794 0.56070 -0.53428
C -3.15615 -1.07672 0.08409
Br -4.53966 -2.36307 -0.05128
C -1.87934 -1.47253 0.46270
H -1.67025 -2.51605 0.67846
C -0.84421 -0.54201 0.56193
C 0.51109 -0.99715 1.00256
N 1.50289 -1.05817 -0.06351
N -0.08219 1.75751 0.39080
H -0.38006 2.72520 0.37713
H 0.58970 1.57047 1.14509
C 1.44563 -0.44757 -1.19466
C 2.69683 -1.88127 0.24914
C 2.58044 -0.48599 -2.16549
H 0.53868 0.09445 -1.43869

```



C 3.95851 -1.22553 -0.23889  
H 2.53457 -2.84781 -0.24415  
H 2.71784 -2.04226 1.32687  
C 3.90798 -0.53920 -1.45276  
H 2.51286 0.37857 -2.82925  
H 2.44975 -1.38026 -2.79546  
C 5.05124 0.09326 -1.94018  
C 5.14745 -1.28677 0.48730  
C 6.29422 -0.66803 -0.00958  
C 6.24478 0.02291 -1.22161  
H 5.17380 -1.81293 1.43823  
H 7.22142 -0.71524 0.55343  
H 5.00535 0.64175 -2.87740  
H 7.13446 0.51447 -1.60387  
H 0.45947 -1.99994 1.43235  
H 1.02443 -0.13086 1.90856  
O 1.44470 0.80755 2.65176  
C 2.84357 0.89835 2.55815  
C 3.30244 1.80454 1.41887  
H 3.29327 -0.10268 2.42071  
H 3.25680 1.28310 3.50452  
H 2.91961 1.44474 0.45554  
H 4.39711 1.83947 1.35540  
H 2.93305 2.82570 1.57084

SCF energy: -6025.941958 hartree  
zero-point correction: +0.344886 hartree  
enthalpy correction: +0.367485 hartree  
free energy correction: +0.291857 hartree  
quasiharmonic free energy correction: +0.296458 hartree

## 10.7 Transition State 6g

C -1.90248 -1.13015 -0.76607  
C -2.64645 -2.25400 -1.16009  
C -3.27554 -3.06165 -0.21804  
H -3.85430 -3.91902 -0.55023  
C -3.17334 -2.76604 1.14282  
C -2.41648 -1.66551 1.54017  
H -2.31939 -1.43110 2.59801  
C -1.76363 -0.84026 0.61498  
C -1.01256 0.36480 1.06940  
N 0.42525 0.30723 0.89749  
N -1.25004 -0.34578 -1.71618  
H -1.58654 -0.49041 -2.66154  
H -1.20777 0.64914 -1.48251  
C 1.17486 1.43620 1.50067  
C 1.07340 -0.59536 0.23392  
C 2.28899 1.90677 0.58331  
C 2.50323 -0.49489 -0.01881  
C 3.14575 0.74310 0.15890  
H 2.88301 2.66213 1.10385  
H 1.85380 2.38222 -0.30605

```

C 4.50740 0.84157 -0.11049
C 3.21575 -1.61353 -0.46751
C 4.57913 -1.50458 -0.72324
C 5.22204 -0.27778 -0.54438
H 2.69802 -2.55882 -0.60775
H 5.13911 -2.36981 -1.06359
H 5.01221 1.79535 0.01913
H 6.28563 -0.19077 -0.74608
H -1.19998 0.60234 2.12113
H -1.34679 1.42875 0.32666
O -1.65923 2.35866 -0.48478
C -3.06016 2.33636 -0.56660
C -3.65410 3.73926 -0.58292
H -3.48729 1.78105 0.29167
H -3.39642 1.79860 -1.47327
H -3.37983 4.28151 0.32880
H -4.74790 3.70609 -0.64859
H -3.27570 4.30351 -1.44247
H 1.57094 1.07155 2.45526
H 0.45662 2.23171 1.69637
H 0.52103 -1.45668 -0.12773
H -3.66751 -3.38768 1.88295
H -2.73840 -2.47494 -2.22104

```

|  |                                       |                     |
|--|---------------------------------------|---------------------|
|  | SCF energy:                           | -883.530872 hartree |
|  | zero-point correction:                | +0.364397 hartree   |
|  | enthalpy correction:                  | +0.384524 hartree   |
|  | free energy correction:               | +0.315499 hartree   |
|  | quasiharmonic free energy correction: | +0.319576 hartree   |

## 10.8 Transition State 6h

```

C 2.35238 -0.57483 0.88802
C 3.53641 -1.14619 1.38031
C 4.52728 -1.59799 0.51396
H 5.43908 -2.02568 0.92153
C 4.35488 -1.49213 -0.86740
C 3.17070 -0.94708 -1.36075
H 3.01892 -0.87008 -2.43530
C 2.15219 -0.49081 -0.51346
C 0.92816 0.15103 -1.07130
N -0.30163 -0.61059 -0.89851
N 1.35206 -0.15544 1.76459
H 1.67132 -0.04213 2.72017
H 0.83052 0.66386 1.44520
C -0.44885 -1.66686 -0.17835
C -1.48476 -0.01855 -1.56529
C -1.79191 -2.27976 0.04937
H 0.44001 -2.11250 0.25511
C -2.70155 -0.08886 -0.68339
H -1.63556 -0.58621 -2.49191
H -1.23737 1.01118 -1.82353
C -2.86981 -1.22661 0.10761

```

```

H -1.76419 -2.87792 0.96254
H -1.98800 -2.97662 -0.78101
C -3.99240 -1.34171 0.92717
C -3.64865 0.93448 -0.65571
C -4.77821 0.81026 0.15241
C -4.95013 -0.32788 0.94216
H -3.50028 1.82424 -1.26196
H -5.51790 1.60492 0.17369
H -4.11457 -2.22245 1.55237
H -5.82508 -0.42123 1.57858
H 1.02196 0.35562 -2.14171
H 0.64058 1.31002 -0.41164
O 0.40725 2.30617 0.30089
C 1.61959 3.01016 0.37978
C 1.44128 4.49678 0.09708
H 2.34861 2.59722 -0.34487
H 2.08190 2.88995 1.37691
H 1.03833 4.64899 -0.91026
H 2.39585 5.03080 0.17139
H 0.74282 4.94138 0.81459
H 5.12588 -1.83674 -1.54960
H 3.67659 -1.21442 2.45676

```

```

SCF energy: -883.523914 hartree
zero-point correction: +0.363820 hartree
enthalpy correction: +0.384085 hartree
free energy correction: +0.314386 hartree
quasiharmonic free energy correction: +0.319062 hartree

```

## 10.9 Transition State 6i

```

C -1.01417 0.83631 0.19555
C -2.38458 1.11098 0.08723
Br -2.96748 2.91295 0.08567
C -3.34814 0.11367 -0.00548
H -4.39907 0.37144 -0.07539
C -2.92979 -1.20789 -0.00079
Br -4.21876 -2.58988 -0.12790
C -1.57981 -1.53031 0.07037
H -1.26184 -2.56810 0.05033
C -0.61338 -0.52758 0.16328
C 0.82063 -0.89190 0.33192
N 1.69043 -0.46975 -0.77922
N -0.05864 1.83542 0.25557
C 1.27123 0.19846 -1.80450
C 3.45448 1.30897 -2.06089
C 3.11212 -0.70176 -0.61544
C 4.00739 0.17932 -1.23610
C 5.37432 -0.03352 -1.06339
C 3.56399 -1.78449 0.13628
C 4.93442 -1.98131 0.29038
C 5.84070 -1.10265 -0.30011
H 2.87204 -2.47551 0.60108

```

H 5.28797 -2.82377 0.87629  
H 6.07451 0.64925 -1.53708  
H 6.90848 -1.25377 -0.17428  
C 2.20338 0.81978 -2.78398  
H 4.20230 1.66289 -2.77345  
H 3.19098 2.15010 -1.40562  
H 2.46091 0.06322 -3.54009  
H 1.68076 1.62943 -3.29681  
H 0.92819 -1.96866 0.45972  
H 0.19764 0.28954 -1.92906  
H 0.76684 1.60780 0.81123  
H -0.41245 2.75712 0.48214  
H 4.35187 0.61491 1.62442  
H 1.31380 -0.19674 1.38178  
H 2.83563 -1.06691 2.74256  
O 1.72949 0.61022 2.25725  
C 4.12296 0.65983 2.69590  
C 2.77234 0.01204 2.98072  
H 4.93044 0.15690 3.24185  
H 4.11033 1.71392 2.99614  
H 2.57195 0.07052 4.06431

SCF energy: -6025.937376 hartree  
zero-point correction: +0.344845 hartree  
enthalpy correction: +0.367522 hartree  
free energy correction: +0.292354 hartree  
quasiharmonic free energy correction: +0.296092 hartree

## 11 Cartesian Coordinates and Energies of Transition States TS-7

### 11.1 Transition State 7a

C 0.58012 0.47073 -0.42370  
C -0.62158 1.19214 -0.14233  
C -1.85889 0.59773 0.02826  
C -1.95786 -0.78982 -0.02968  
C -0.82659 -1.56375 -0.25771  
H -0.89880 -2.64767 -0.29200  
C 0.40817 -0.95827 -0.45854  
C 1.59237 -1.81263 -0.80217  
N 2.80772 -1.47409 -0.04491  
N 1.80856 0.98518 -0.59257  
C 4.12697 -1.67437 -0.67292  
C 2.84203 -0.52229 0.84303  
C 4.24507 -0.10956 1.14949  
C 5.08483 -1.16408 0.40350  
H 4.42635 -0.07387 2.22602  
H 4.39328 0.89994 0.75085  
H 4.16228 -1.06811 -1.58689  
H 4.25671 -2.72653 -0.93359  
H 5.35008 -1.97851 1.08268  
H 5.99984 -0.75266 -0.02379  
H 1.78301 1.99507 -0.45687  
H 1.97012 -0.28425 1.43797  
H 1.37365 -2.87625 -0.67566  
H 1.86891 -1.64771 -1.85237  
H -2.73629 1.20803 0.21560  
Br -0.52409 3.08507 -0.03131  
Br -3.64594 -1.61708 0.22409

|  |                                       |                      |
|--|---------------------------------------|----------------------|
|  | SCF energy:                           | -5679.280166 hartree |
|  | zero-point correction:                | +0.214837 hartree    |
|  | enthalpy correction:                  | +0.228631 hartree    |
|  | free energy correction:               | +0.173402 hartree    |
|  | quasiharmonic free energy correction: | +0.174399 hartree    |

### 11.2 Transition State 7b

C -1.13841 0.73552 -0.47378  
C -2.41283 1.33253 -0.22285  
H -2.52454 2.39760 -0.41963  
C -3.49251 0.59796 0.24090  
H -4.44454 1.09978 0.40094  
C -3.37359 -0.77347 0.51352  
H -4.21890 -1.34617 0.88102  
C -2.13522 -1.38037 0.30605  
H -2.01206 -2.44156 0.51786

C -1.03827 -0.66763 -0.17919  
C 0.24958 -1.37841 -0.46763  
N 1.43669 -0.68815 0.06702  
N -0.04340 1.40179 -0.90360  
C 2.73455 -0.83661 -0.61648  
C 1.37086 0.42431 0.73502  
C 2.70361 1.09447 0.81856  
C 3.65804 0.03480 0.23539  
H 2.93941 1.39216 1.84271  
H 2.66343 2.00231 0.20663  
H 2.62408 -0.45551 -1.63940  
H 3.01276 -1.89168 -0.65408  
H 4.09118 -0.56126 1.04284  
H 4.46786 0.46954 -0.35127  
H -0.27457 2.39321 -0.98893  
H 0.49988 0.66688 1.32851  
H 0.24222 -2.40741 -0.09666  
H 0.42595 -1.41202 -1.55157

|                           |             |                     |
|---------------------------|-------------|---------------------|
|                           | SCF energy: | -536.857885 hartree |
| zero-point                | correction: | +0.233427 hartree   |
| enthalpy                  | correction: | +0.244573 hartree   |
| free energy               | correction: | +0.197706 hartree   |
| quasiharmonic free energy | correction: | +0.197968 hartree   |

### 11.3 Transition State 7c

C -0.44901 0.56713 -0.81220  
C 0.62593 1.27484 -0.17923  
Br 0.36815 3.11207 0.22773  
C 1.84693 0.71029 0.13938  
H 2.62511 1.31479 0.59334  
C 2.06261 -0.63979 -0.12607  
Br 3.73466 -1.42443 0.30735  
C 1.04985 -1.40924 -0.68661  
H 1.19821 -2.47190 -0.86110  
C -0.16713 -0.83179 -1.02319  
C -1.27958 -1.69901 -1.53876  
N -2.42899 -1.53958 -0.62022  
N -1.62719 1.07600 -1.18829  
C -2.24201 -2.03668 0.75747  
C -3.30561 -0.63206 -0.92624  
C -3.51188 -1.88571 1.57788  
H -1.42348 -1.47078 1.21533  
H -1.92891 -3.08125 0.67288  
H -4.27672 -2.58342 1.21552  
H -3.28280 -2.15130 2.61337  
H -1.62272 -1.39903 -2.53356  
H -0.98770 -2.75154 -1.55786  
C -4.35420 -0.15153 0.01358  
H -4.50696 0.91417 -0.17874  
H -5.28431 -0.65534 -0.28804  
H -3.38667 -0.37158 -1.97364

H -1.69288 2.05185 -0.90359  
C -4.02252 -0.45126 1.47108  
H -4.90818 -0.29903 2.09292  
H -3.24715 0.24084 1.82225

SCF energy: -5718.586289 hartree  
zero-point correction: +0.244294 hartree  
enthalpy correction: +0.259030 hartree  
free energy correction: +0.201639 hartree  
quasiharmonic free energy correction: +0.203169 hartree

#### 11.4 Transition State 7d

C 0.43270 0.62319 0.81072  
C -0.66608 1.28784 0.17029  
Br -0.47104 3.12830 -0.25400  
C -1.86496 0.67732 -0.14494  
H -2.66270 1.24931 -0.60730  
C -2.03462 -0.67762 0.13392  
Br -3.67483 -1.52590 -0.29868  
C -0.99994 -1.40480 0.70881  
H -1.11323 -2.46913 0.89860  
C 0.19481 -0.78012 1.04268  
C 1.33350 -1.59668 1.57721  
N 2.45902 -1.44840 0.62634  
N 1.59572 1.17069 1.17695  
C 2.28245 -1.99896 -0.72823  
C 3.33893 -0.53135 0.86249  
C 3.58027 -1.86283 -1.49679  
H 1.48094 -1.45039 -1.23159  
H 1.98939 -3.04728 -0.62439  
H 4.36311 -2.50310 -1.06766  
H 3.42721 -2.13332 -2.54192  
H 1.69288 -1.24209 2.54792  
H 1.07398 -2.65530 1.64550  
C 4.34208 -0.11194 -0.15846  
H 4.43277 0.97648 -0.13691  
H 5.31205 -0.54024 0.14430  
H 3.47197 -0.19565 1.88260  
H 1.62654 2.14655 0.88632  
O 3.99908 -0.50256 -1.46757

SCF energy: -5754.468305 hartree  
zero-point correction: +0.220598 hartree  
enthalpy correction: +0.235071 hartree  
free energy correction: +0.177989 hartree  
quasiharmonic free energy correction: +0.179682 hartree

#### 11.5 Transition State 7e

C -0.35828 0.55738 0.95949  
C -1.30786 1.29842 0.18157

```

Br -0.89861 3.10192 -0.24374
C -2.51069 0.78466 -0.26289
H -3.19616 1.40896 -0.82705
C -2.83047 -0.54281 0.01909
Br -4.48365 -1.25139 -0.58193
C -1.93825 -1.34280 0.72151
H -2.16628 -2.38889 0.91057
C -0.73904 -0.81442 1.18319
C 0.26853 -1.71104 1.83951
N 1.49031 -1.67357 1.00618
N 0.79615 1.01210 1.45647
H 0.96562 1.96473 1.13704
C 1.37157 -2.13035 -0.39136
C 2.39945 -0.78839 1.31175
C 2.74971 -2.42326 -0.96043
H 0.87428 -1.34417 -0.97317
H 0.73826 -3.01981 -0.39217
C 3.47106 -0.44865 0.38370
H 2.45326 -0.45433 2.33886
C 3.65992 -1.23969 -0.76172
H 2.65809 -2.66591 -2.02211
H 3.18004 -3.29879 -0.45669
C 4.70662 -0.92585 -1.62725
C 4.32338 0.62544 0.66817
C 5.35708 0.93275 -0.20805
C 5.54477 0.15565 -1.35533
H 4.15807 1.21619 1.56561
H 6.01564 1.77042 -0.00208
H 4.86616 -1.53026 -2.51627
H 6.35295 0.39312 -2.04093
H -0.08766 -2.74189 1.89394
H 0.55654 -1.36996 2.83841

```

|  |                                       |                      |
|--|---------------------------------------|----------------------|
|  | SCF energy:                           | -5870.971488 hartree |
|  | zero-point correction:                | +0.268264 hartree    |
|  | enthalpy correction:                  | +0.285138 hartree    |
|  | free energy correction:               | +0.222685 hartree    |
|  | quasiharmonic free energy correction: | +0.225291 hartree    |

## 11.6 Transition State 7f

```

C -0.71349 1.00477 0.89509
C -1.78743 1.22123 -0.02937
Br -1.99023 2.95699 -0.77158
C -2.69720 0.24910 -0.39943
H -3.50372 0.48936 -1.08447
C -2.56388 -1.03985 0.11385
Br -3.80830 -2.38007 -0.38742
C -1.51476 -1.34426 0.97183
H -1.38345 -2.35731 1.34354
C -0.61706 -0.35680 1.35763
C 0.57616 -0.71767 2.19125
N 1.77298 -0.36960 1.39188

```



N 0.16799 1.91362 1.32590  
 H 0.02166 2.80046 0.84615  
 C 2.27908 0.81708 1.54350  
 C 1.97560 -1.10518 0.13171  
 C 3.25346 1.36159 0.54849  
 H 2.14177 1.30200 2.49965  
 C 3.40098 -0.96720 -0.32887  
 H 1.28814 -0.69882 -0.62230  
 H 1.70837 -2.14897 0.31034  
 C 4.03700 0.25945 -0.12341  
 H 3.90880 2.08470 1.03778  
 H 2.66941 1.91268 -0.20202  
 C 5.35459 0.43604 -0.54667  
 C 4.07772 -2.01262 -0.95698  
 C 5.38972 -1.82910 -1.39178  
 C 6.02807 -0.60515 -1.18475  
 H 3.57776 -2.96656 -1.10423  
 H 5.91580 -2.64246 -1.88236  
 H 5.85157 1.38792 -0.37735  
 H 7.05281 -0.46313 -1.51494  
 H 0.60276 -1.78555 2.41790  
 H 0.63850 -0.14320 3.12010

|  |                                       |                      |
|--|---------------------------------------|----------------------|
|  | SCF energy:                           | -5870.964786 hartree |
|  | zero-point correction:                | +0.267527 hartree    |
|  | enthalpy correction:                  | +0.284567 hartree    |
|  | free energy correction:               | +0.221395 hartree    |
|  | quasiharmonic free energy correction: | +0.224392 hartree    |

## 11.7 Transition State 7g

C 1.97338 -1.09880 0.21497  
 C 2.76650 -1.65612 -0.84178  
 C 3.83818 -0.97661 -1.39308  
 H 4.42068 -1.45429 -2.17833  
 C 4.18108 0.31730 -0.96306  
 C 3.39869 0.90751 0.02792  
 H 3.61649 1.92340 0.35630  
 C 2.33233 0.23292 0.62425  
 C 1.43271 0.93634 1.59373  
 N 0.08433 0.98696 0.97962  
 N 0.94177 -1.72594 0.81266  
 H 0.77905 -2.61852 0.34339  
 C -0.05316 1.71286 -0.29661  
 C -0.74964 0.02567 1.26029  
 C -1.51358 2.04578 -0.55304  
 H 0.34430 1.07987 -1.09936  
 H 0.55839 2.61463 -0.22802  
 C -1.96684 -0.17766 0.48370  
 H -0.60609 -0.51218 2.18743  
 C -2.36284 0.80725 -0.43677  
 H -1.61372 2.49115 -1.54601  
 H -1.85726 2.78906 0.17834

C -3.54252 0.61902 -1.15500  
C -2.74601 -1.32227 0.69378  
C -3.91520 -1.50164 -0.03564  
C -4.30962 -0.52985 -0.96047  
H -2.41970 -2.06618 1.41608  
H -4.51881 -2.39130 0.11269  
H -3.86098 1.37458 -1.86831  
H -5.22329 -0.66793 -1.53124  
H 1.76319 1.96019 1.78481  
H 1.31937 0.40665 2.54475  
H 5.02304 0.84571 -1.39787  
H 2.51183 -2.65209 -1.19963

|                                       |                     |
|---------------------------------------|---------------------|
| SCF energy:                           | -728.547932 hartree |
| zero-point correction:                | +0.286831 hartree   |
| enthalpy correction:                  | +0.301029 hartree   |
| free energy correction:               | +0.246777 hartree   |
| quasiharmonic free energy correction: | +0.248216 hartree   |

## 11.8 Transition State 7h

C -2.50638 0.87864 -0.20822  
C -3.40315 0.59044 -1.28886  
C -4.07427 -0.61595 -1.38617  
H -4.75931 -0.77490 -2.21653  
C -3.88178 -1.63658 -0.43925  
C -2.98057 -1.40561 0.59897  
H -2.78309 -2.18974 1.32926  
C -2.31552 -0.18698 0.73961  
C -1.26200 -0.00996 1.78948  
N 0.01754 0.23116 1.07627  
N -1.84828 2.04319 -0.04574  
H -2.04294 2.64911 -0.84462  
C 0.36087 1.45703 0.83030  
C 0.54641 -0.86834 0.25141  
C 1.44503 1.76516 -0.15206  
H -0.02826 2.22531 1.48261  
C 2.01080 -0.65931 -0.02409  
H -0.02031 -0.89977 -0.68844  
H 0.36708 -1.80225 0.78855  
C 2.45770 0.64803 -0.23139  
H 1.91233 2.71734 0.10661  
H 0.96149 1.89984 -1.13016  
C 3.80553 0.88462 -0.50367  
C 2.90671 -1.72630 -0.09409  
C 4.25024 -1.48859 -0.38124  
C 4.69929 -0.18271 -0.58517  
H 2.55222 -2.73956 0.07723  
H 4.94728 -2.31940 -0.43594  
H 4.15306 1.90376 -0.65267  
H 5.74691 0.00550 -0.80042  
H -1.14884 -0.90168 2.41051  
H -1.42626 0.86361 2.42798

H -4.41036 -2.58094 -0.51980  
H -3.55920 1.36180 -2.04145

```
SCF energy: -728.541429 hartree
zero-point correction: +0.286250 hartree
enthalpy correction: +0.300565 hartree
free energy correction: +0.245859 hartree
quasiharmonic free energy correction: +0.247544 hartree
```

## 11.9 Transition State 7i

C 0.51782 0.72972 -0.37517  
C 1.88681 1.13440 -0.26455  
Br 2.28030 2.98686 -0.39714  
C 2.94363 0.25933 -0.09521  
H 3.96037 0.63475 -0.04081  
C 2.68348 -1.10452 0.01574  
Br 4.12272 -2.31519 0.26395  
C 1.37746 -1.57428 -0.04437  
H 1.17113 -2.63700 0.05049  
C 0.32193 -0.69209 -0.24216  
C -1.05821 -1.25236 -0.41698  
N -2.10447 -0.57724 0.40199  
N -0.54865 1.52473 -0.52179  
C -1.75932 0.34257 1.25389  
C -3.89864 1.54815 0.94194  
C -3.47413 -0.73758 0.00135  
C -4.38688 0.29214 0.26841  
C -5.71461 0.11467 -0.11757  
C -3.87517 -1.91444 -0.63076  
C -5.20680 -2.06763 -1.01059  
C -6.12822 -1.05348 -0.75656  
H -3.16604 -2.71130 -0.82498  
H -5.51901 -2.98364 -1.50195  
H -6.42826 0.90881 0.08571  
H -7.16642 -1.17165 -1.05116  
C -2.77250 1.20638 1.91186  
H -4.72015 2.03865 1.46871  
H -3.52569 2.24797 0.18419  
H -3.15752 0.64475 2.77698  
H -2.27465 2.09715 2.29865  
H -0.24959 2.49894 -0.54079  
H -1.39018 -1.10375 -1.45134  
H -1.07219 -2.32161 -0.19532  
H -0.73576 0.33104 1.60608

```
SCF energy: -5870.961087 hartree
zero-point correction: +0.267717 hartree
enthalpy correction: +0.284702 hartree
free energy correction: +0.222192 hartree
quasiharmonic free energy correction: +0.224309 hartree
```

## 12 Cartesian Coordinates and Energies of the 1,3-dipolar Cycloaddition

### 12.1 Transition State TS-8

C 2.52329 1.19552 0.26174  
C 3.88578 1.28739 -0.01850  
C 4.71946 0.17586 -0.14209  
H 5.77158 0.29595 -0.37104  
C 4.14978 -1.07010 0.03068  
C 2.79632 -1.22374 0.31091  
H 2.41976 -2.22189 0.48094  
C 1.95769 -0.10863 0.44381  
C 0.54230 -0.16729 0.74755  
N -0.12456 -1.33485 1.10552  
N 1.73599 2.32486 0.44577  
C -0.00992 -2.55437 0.66276  
C -1.24514 -1.21548 2.08571  
C -2.00787 -2.53443 1.94785  
H -1.83273 -0.32926 1.83253  
H -0.79292 -1.07322 3.07124  
C -1.00983 -3.48470 1.26030  
H -2.88442 -2.39775 1.31087  
H -2.34205 -2.90513 2.91754  
H -1.47424 -4.10482 0.48774  
H -0.51115 -4.15849 1.96832  
Br 4.67640 2.99777 -0.23201  
Br 5.24235 -2.61278 -0.12125  
C -0.32920 -0.10432 -1.35720  
H 0.12992 0.68207 1.28067  
O 0.03811 -1.19383 -1.85114  
H 0.72974 -2.82555 -0.07455  
C -1.74274 0.15441 -0.95672  
H 0.26484 0.80670 -1.53357  
C -2.73478 -0.86012 -0.96527  
C -2.06019 1.45189 -0.55217  
C -3.33073 1.76721 -0.10629  
C -4.00594 -0.49470 -0.47006  
C -4.31813 0.78796 -0.05171  
H -1.28734 2.21493 -0.59379  
H -5.31637 1.01906 0.30386  
N -2.47409 -2.13906 -1.37653  
H -3.25088 -2.70967 -1.67896  
H -1.58668 -2.27811 -1.84671  
Br -5.37481 -1.80392 -0.43911  
Br -3.74034 3.53780 0.42059  
H 2.12510 3.18269 0.07383  
H 0.76449 2.22183 0.18119

SCF energy: -11222.509770 hartree  
zero-point correction: +0.324507 hartree  
enthalpy correction: +0.350234 hartree  
free energy correction: +0.266874 hartree  
quasiharmonic free energy correction: +0.272462 hartree

## 12.2 Transition State TS-9

C 2.46817 1.15836 -0.18525  
C 3.85806 1.32953 -0.29139  
C 4.76159 0.28940 -0.12424  
H 5.82712 0.46603 -0.21990  
C 4.26359 -0.96643 0.17417  
C 2.89647 -1.18206 0.29445  
H 2.55257 -2.16615 0.58268  
C 1.98772 -0.14470 0.10471  
C 0.49636 -0.32992 0.31774  
N 0.10600 -1.61022 0.86442  
N 1.60702 2.24413 -0.24942  
C 0.18960 -2.69004 0.12379  
C -0.92098 -1.72012 1.92855  
C -1.66424 -3.02168 1.59001  
H -1.56145 -0.83590 1.91294  
H -0.40217 -1.76226 2.89038  
C -0.73879 -3.75462 0.60039  
H -2.61414 -2.79194 1.10297  
H -1.86319 -3.61307 2.48438  
H -1.26847 -4.20115 -0.24602  
H -0.14388 -4.54809 1.06930  
Br 4.56210 3.04790 -0.66625  
Br 5.46115 -2.40879 0.42845  
C -0.38238 -0.30038 -1.05066  
H 0.16006 0.44782 1.01074  
O -0.22931 -1.48118 -1.69098  
H 1.01675 -2.87601 -0.54250  
C -1.83614 0.06586 -0.67314  
H 0.02598 0.53791 -1.64173  
C -2.93390 -0.81142 -0.87531  
C -2.06125 1.32135 -0.10947  
C -3.32844 1.73089 0.27820  
C -4.19904 -0.36045 -0.44146  
C -4.41727 0.88653 0.12247  
H -1.22649 2.00093 0.03465  
H -5.41348 1.18533 0.42913  
N -2.78593 -2.06724 -1.41833  
H -3.58697 -2.45536 -1.89704  
H -1.86965 -2.20251 -1.84608  
Br -5.69627 -1.50355 -0.66214  
Br -3.57479 3.45054 1.03223  
H 2.02742 3.09994 -0.59106  
H 0.72342 2.08309 -0.71299

SCF energy: -11222.518087 hartree  
zero-point correction: +0.327102 hartree  
enthalpy correction: +0.351786 hartree  
free energy correction: +0.270662 hartree  
quasiharmonic free energy correction: +0.275919 hartree

### 12.3 Zwitterion 21

C 2.55353 1.26623 0.02304  
C 3.95381 1.30510 -0.07400  
C 4.74097 0.16121 -0.08295  
H 5.81976 0.23856 -0.16154  
C 4.11336 -1.06843 0.01121  
C 2.73000 -1.15729 0.11255  
H 2.28177 -2.13783 0.20575  
C 1.94403 -0.01119 0.12193  
C 0.43680 -0.04688 0.22172  
N -0.11320 -1.22917 0.89600  
N 1.80599 2.42852 0.10482  
C -0.12559 -2.43988 0.45904  
C -0.86049 -1.08418 2.17474  
C -1.65706 -2.38888 2.25081  
H -1.47777 -0.18531 2.11917  
H -0.12562 -0.97037 2.97803  
C -0.84788 -3.36146 1.37671  
H -2.64765 -2.24041 1.81065  
H -1.77619 -2.73702 3.27671  
H -1.44919 -4.08474 0.82350  
H -0.09394 -3.91807 1.95000  
Br 4.83250 2.97835 -0.18724  
Br 5.15015 -2.65019 0.00457  
C -0.28208 0.07080 -1.19368  
H 0.12139 0.79417 0.84653  
O 0.02770 -0.95275 -2.02369  
H 0.36737 -2.70011 -0.47031  
C -1.78085 0.24965 -0.86316  
H 0.05693 1.05491 -1.57895  
C -2.69714 -0.82872 -0.90558  
C -2.20589 1.50716 -0.44603  
C -3.51811 1.72178 -0.04334  
C -4.00737 -0.57083 -0.46362  
C -4.43484 0.68088 -0.04180  
H -1.49043 2.32730 -0.43591  
H -5.46092 0.83500 0.27365  
N -2.29026 -2.08825 -1.30016  
H -3.01191 -2.69626 -1.66657  
H -1.42082 -2.03324 -1.84478  
Br -5.26622 -1.98713 -0.48022  
Br -4.06532 3.44744 0.51370  
H 2.28249 3.27565 -0.17777  
H 0.86582 2.39539 -0.26729

```
SCF energy: -11222.527464 hartree
zero-point correction: +0.326989 hartree
enthalpy correction: +0.352544 hartree
free energy correction: +0.269045 hartree
quasiharmonic free energy correction: +0.274987 hartree
```

## 12.4 Cycloadduct

```
C -2.56285 1.01682 0.04207
C -3.31210 -0.16457 0.18467
C -2.81465 -1.31076 0.79253
H -3.42406 -2.20575 0.85445
C -1.53055 -1.27658 1.31425
C -0.77638 -0.11298 1.25085
H 0.23014 -0.09128 1.66116
C -1.26554 1.01950 0.60557
C -0.26098 2.11379 0.32913
N -0.71993 3.50760 0.27640
N -3.02469 2.10081 -0.67231
C -0.02710 4.12471 -0.88550
C -0.36382 4.30088 1.47803
C 0.91248 5.05483 1.10227
H -0.25613 3.63894 2.34148
H -1.17357 5.00691 1.69369
C 0.64628 5.38688 -0.36941
H 1.78472 4.39681 1.19419
H 1.08017 5.93986 1.72039
H 1.53885 5.61866 -0.95558
H -0.05087 6.22730 -0.45229
Br -5.06928 -0.21742 -0.51743
Br -0.81664 -2.80692 2.16985
C 0.36327 1.91146 -1.07434
H 0.55006 2.01893 1.06616
O 0.95379 3.17719 -1.32684
H -0.72931 4.29331 -1.71106
C 1.30006 0.73646 -1.07650
H -0.43873 1.73504 -1.80592
C 2.56509 0.77833 -0.44516
C 0.75784 -0.47414 -1.49874
C 1.42533 -1.66759 -1.26173
C 3.22886 -0.45089 -0.28121
C 2.67713 -1.66624 -0.66589
H -0.22405 -0.47917 -1.96420
H 3.21969 -2.59009 -0.49774
N 3.07507 1.95403 0.05817
H 4.06783 1.98020 0.24902
H 2.70197 2.80524 -0.34612
Br 4.93307 -0.46433 0.54237
Br 0.63845 -3.30311 -1.79707
H -4.02612 2.16592 -0.80035
H -2.56431 2.97719 -0.43393
```

```
SCF energy: -11222.573349 hartree
zero-point correction: +0.328735 hartree
enthalpy correction: +0.353529 hartree
free energy correction: +0.271108 hartree
quasiharmonic free energy correction: +0.277736 hartree
```



## 13 Reaction Enthalpies for the Formation of Iminium Ions in Model Systems

### Exocyclic Iminium Ions:

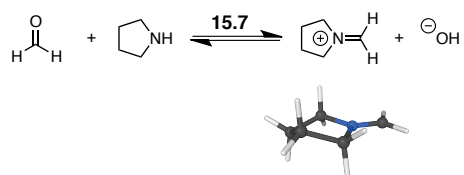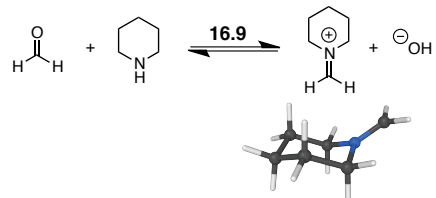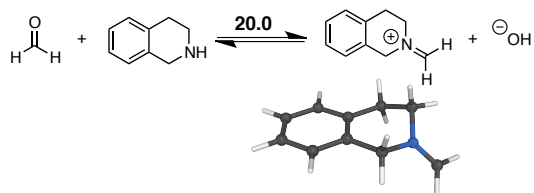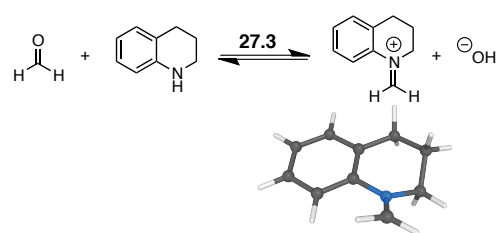

### Endocyclic Iminium Ions:

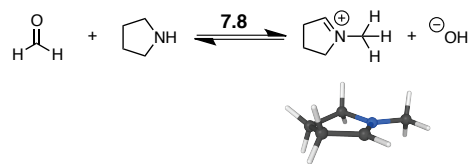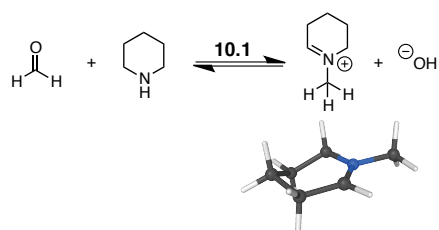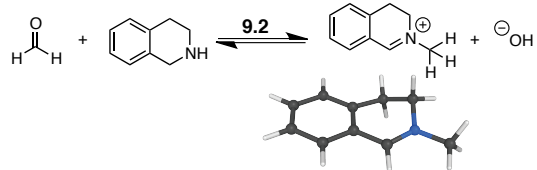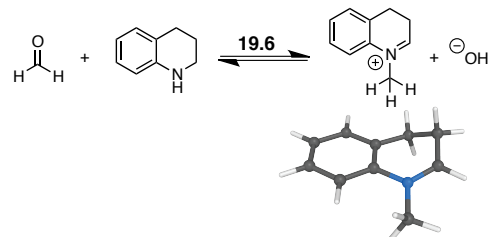

## 14 Gaussian 09 Reference

Frisch, M. J.; Trucks, G. W.; Schlegel, H.; Scuseria, G. E.; Robb, M. A.; Cheeseman, J. R.; Scalmani, G.; Barone, V.; Mennucci, B.; Petersson, G. A.; Nakatsuji, H.; Caricato, M.; Li, X.; Hratchian, H. P.; Izmaylov, A. F.; Bloino, J.; Zheng, G.; Sonnenberg, J. L.; Hada, M.; Ehara, M.; Toyota, K.; Fukuda, R.; Hasegawa, J.; Ishida, M.; Nakajima, T.; Honda, Y.; Kitao, O.; Nakai, H.; Vreven, T.; Montgomery, J. A.; Peralta, J. E.; Ogliaro, F.; Bearpark, M.; Heyd, J. J.; Brothers, E.; Kudin, K. N.; Staroverov, V. N.; Kobayashi, R.; Normand, J.; Raghavachari, K.; Rendell, A.; Burant, J. C.; Iyengar, S. S.; Tomasi, J.; Cossi, M.; Rega, N.; Millam, J. M.; Klene, M.; Knox, J. E.; Cross, J. B.; Bakken, V.; Adamo, C.; Jaramillo, J.; Gomperts, R.; Stratmann, R. E.; Yazyev, O.; Austin, A. J.; Cammi, R.; Pomelli, C.; Ochterski, J. W.; Martin, R. L.; Morokuma, K.; Zakrzewski, V. G.; Voth, G. A.; Salvador, P.; Dannenberg, J. J.; Dapprich, S.; Daniels, A. D.; Farkas, Foresman, J. B.; Ortiz, J. V.; Cioslowski, J.; Fox, D. J. *Gaussian 09*, Revision C.01 2009.
